# Supplementary material
Source: publisher figshare collection journal article supplement (https://acs.figshare.com/ndownloader/files/4594549)
Supplement: Supplementary file 1 [file 4594549]

data_global                        

 #1. SUBMISSION DETAILS
 _publ_contact_author_name     'Sonny C. Lee'                    
 _publ_contact_author_address
;                                                                               
 Department of Chemistry
 University of Waterloo
 200 University Avenue West
 Waterloo, Ontario  N2L 3G1
 CANADA  
;
 _publ_contact_author_email   'sclee@uwaterloo.ca'
 _publ_contact_author_fax     '519-746-0435'
 _publ_contact_author_phone   '519-885-1211 x37501'
 _publ_requested_journal      'Inorganic Chemistry'

 #2, TITLE AND AUTHOR LIST

 _publ_section_title               
;
Synthesis and Elaboration of the Dinuclear Iron Imide 
Cluster Core [Fe2(mu-NR)2]2+
;
 loop_
     _publ_author_name
     _publ_author_address

    'Lee, Sonny C.'
;
 Department of Chemistry
 University of Waterloo
 200 University Avenue West
 Waterloo, Ontario  N2L 3G1
 CANADA  
; 
     'Verma, Atul K.'
;
 Department of Chemistry
 Princeton University
 Princeton
 NJ 08544
 USA
; 
    'Zdilla, Michael J.'
; 
 Department of Chemistry
 Princeton University
 Princeton
 NJ 08544
 USA
;

 #3. RESULTS
 
data_2 
 
_audit_creation_method            SHELXL-97 
_chemical_name_systematic 
; 
 ? 
; 
_chemical_name_common             
'di-t-butylaminebis(2,4,6-triphenylbenzenethiolato)iron(II)' 
_chemical_melting_point           'not determined' 
_chemical_formula_moiety          
'(Fe 2+)(S C24 H17 1-)2 (N C4 H11)2, (C7 H8)0.5' 
_chemical_formula_sum 
 'C59.50 H60 Fe N2 S2' 
_chemical_formula_weight          923.07 
_chemical_compound_source         'synthesis, S. C. Lee Lab'
 
loop_ 
 _atom_type_symbol 
 _atom_type_description 
 _atom_type_scat_dispersion_real 
 _atom_type_scat_dispersion_imag 
 _atom_type_scat_source 
 'C'  'C'   0.0033   0.0016 
 'International Tables Vol C Tables 4.2.6.8 and 6.1.1.4' 
 'H'  'H'   0.0000   0.0000 
 'International Tables Vol C Tables 4.2.6.8 and 6.1.1.4' 
 'Fe'  'Fe'   0.3463   0.8444 
 'International Tables Vol C Tables 4.2.6.8 and 6.1.1.4' 
 'N'  'N'   0.0061   0.0033 
 'International Tables Vol C Tables 4.2.6.8 and 6.1.1.4' 
 'S'  'S'   0.1246   0.1234 
 'International Tables Vol C Tables 4.2.6.8 and 6.1.1.4' 
 
_symmetry_cell_setting            'triclinic' 
_symmetry_space_group_name_H-M    'P -1' 
 
loop_ 
 _symmetry_equiv_pos_as_xyz 
 'x, y, z' 
 '-x, -y, -z' 
 
_cell_length_a                    11.188(2) 
_cell_length_b                    12.099(2) 
_cell_length_c                    19.913(4) 
_cell_angle_alpha                 104.66(3) 
_cell_angle_beta                  92.79(3) 
_cell_angle_gamma                 95.16(3) 
_cell_volume                      2590.1(9) 
_cell_formula_units_Z             2 
_cell_measurement_temperature     200(2) 
_cell_measurement_reflns_used     11543 
_cell_measurement_theta_min       1.06 
_cell_measurement_theta_max       22.2 
 
_exptl_crystal_description        'plate' 
_exptl_crystal_colour             'yellow' 
_exptl_crystal_size_max           0.22 
_exptl_crystal_size_mid           0.08 
_exptl_crystal_size_min           0.05 
_exptl_crystal_density_meas       ? 
_exptl_crystal_density_diffrn     1.184 
_exptl_crystal_density_method     'not measured' 
_exptl_crystal_F_000              978 
_exptl_absorpt_coefficient_mu     0.410 
_exptl_absorpt_correction_type    'none' 
_exptl_absorpt_correction_T_min   ? 
_exptl_absorpt_correction_T_max   ? 
_exptl_absorpt_process_details    ? 
 
_exptl_special_details 
; 
Small single yellow crystal cut from a multiple cluster.  Collected in
4 scan sets at 2 x 180 seconds to 45 degrees.  Processed to 45 and scaled to
Scan set 4 did not have refined mosaicity due to "blowing up."  It was
processed using 1.2 degree mosaicity
 
Solved using direct methods.
Solvent toluene disorderred across inversion center.  Modelled by
a full 6-memberred ring with 1/2 occupied methyl and hydrogen on each
side.
 
This model has no absorption corrections.
; 
 
_diffrn_ambient_temperature       200(2) 
_diffrn_radiation_wavelength      0.71073 
_diffrn_radiation_type            MoK\a 
_diffrn_radiation_source          'fine-focus sealed tube' 
_diffrn_radiation_monochromator   graphite 
_diffrn_measurement_device_type   'Nonius KappaCCD' 
_diffrn_measurement_method        '\w scans' 
_diffrn_detector_area_resol_mean  ? 
_diffrn_standards_number          0 
_diffrn_standards_interval_count  ? 
_diffrn_standards_interval_time   ? 
_diffrn_standards_decay_%         ? 
_diffrn_reflns_number             11543 
_diffrn_reflns_av_R_equivalents   0.085 
_diffrn_reflns_av_sigmaI/netI     0.1572 
_diffrn_reflns_limit_h_min        0 
_diffrn_reflns_limit_h_max        11 
_diffrn_reflns_limit_k_min        -12 
_diffrn_reflns_limit_k_max        12 
_diffrn_reflns_limit_l_min        -21 
_diffrn_reflns_limit_l_max        20 
_diffrn_reflns_theta_min          1.06 
_diffrn_reflns_theta_max          22.20 
_diffrn_measured_fraction_theta_max    0.981 
_diffrn_reflns_theta_full              22.20 
_diffrn_measured_fraction_theta_full   0.981 
_refine_diff_density_max    0.364 
_refine_diff_density_min   -0.365 
_refine_diff_density_rms    0.062
_reflns_number_total              6387 
_reflns_number_gt                 4774 
_reflns_threshold_expression      >2sigma(I) 
 
_computing_data_collection        'NONIUS COLLECT'
_computing_cell_refinement        'DENZO-SMN'
_computing_data_reduction         'DENZO-SMN, Platon, Siemens SHELXTL'
_computing_structure_solution     'Siemens SHELXTL'
_computing_structure_refinement   'Siemens SHELXTL'
_computing_molecular_graphics     'Siemens SHELXTL'
_computing_publication_material   'CIFTAB, Siemens SHELXTL' 
 
_refine_special_details 
; 
 Refinement of F^2^ against ALL reflections.  The weighted R-factor wR and 
 goodness of fit S are based on F^2^, conventional R-factors R are based 
 on F, with F set to zero for negative F^2^. The threshold expression of 
 F^2^ > 2sigma(F^2^) is used only for calculating R-factors(gt) etc. and is 
 not relevant to the choice of reflections for refinement.  R-factors based 
 on F^2^ are statistically about twice as large as those based on F, and R- 
 factors based on ALL data will be even larger. 
; 
 
_refine_ls_structure_factor_coef  Fsqd  
_refine_ls_matrix_type            full 
_refine_ls_weighting_scheme       calc  
_refine_ls_weighting_details 
 'calc w=1/[\s^2^(Fo^2^)+(0.0000P)^2^+3.7524P] where P=(Fo^2^+2Fc^2^)/3' 
_atom_sites_solution_primary      direct 
_atom_sites_solution_secondary    difmap 
_atom_sites_solution_hydrogens    geom 
_refine_ls_hydrogen_treatment     constr 
_refine_ls_extinction_method      none 
_refine_ls_extinction_coef        ? 
_refine_ls_number_reflns          6387 
_refine_ls_number_parameters      591 
_refine_ls_number_restraints      1 
_refine_ls_R_factor_all           0.1816 
_refine_ls_R_factor_gt            0.1226 
_refine_ls_wR_factor_ref          0.1800 
_refine_ls_wR_factor_gt           0.1630 
_refine_ls_goodness_of_fit_ref    1.272 
_refine_ls_restrained_S_all       1.272 
_refine_ls_shift/su_max           0.000 
_refine_ls_shift/su_mean          0.000 
 
loop_ 
 _atom_site_label 
 _atom_site_type_symbol 
 _atom_site_fract_x 
 _atom_site_fract_y 
 _atom_site_fract_z 
 _atom_site_U_iso_or_equiv 
 _atom_site_adp_type 
 _atom_site_occupancy 
 _atom_site_symmetry_multiplicity 
 _atom_site_calc_flag 
 _atom_site_refinement_flags 
 _atom_site_disorder_assembly 
 _atom_site_disorder_group 
Fe1 Fe 0.97227(9) 0.28495(8) 0.24460(6) 0.0312(3) Uani 1 1 d . . . 
S1 S 0.91464(16) 0.12669(15) 0.15116(11) 0.0377(6) Uani 1 1 d . . . 
S2 S 0.84400(16) 0.37160(15) 0.32505(10) 0.0345(5) Uani 1 1 d . . . 
N1 N 1.0902(5) 0.2182(6) 0.3076(3) 0.0392(17) Uani 1 1 d . . . 
H1 H 1.0519 0.2194 0.3476 0.017(18) Uiso 1 1 calc R . . 
H2 H 1.0907 0.1419 0.2848 0.14(5) Uiso 1 1 calc R . . 
N2 N 1.0426(7) 0.4056(5) 0.1908(4) 0.051(2) Uani 1 1 d . . . 
H4 H 1.1246 0.4153 0.2008 0.07(3) Uiso 1 1 calc R . . 
H3 H 1.0297 0.3696 0.1441 0.10(4) Uiso 1 1 calc R . . 
C1 C 1.2183(6) 0.2617(6) 0.3311(4) 0.040(2) Uani 1 1 d . . . 
C2 C 1.2198(8) 0.3843(7) 0.3760(5) 0.079(3) Uani 1 1 d . . . 
H2A H 1.1773 0.3836 0.4178 0.118 Uiso 1 1 calc R . . 
H2B H 1.1797 0.4303 0.3495 0.118 Uiso 1 1 calc R . . 
H2C H 1.3032 0.4177 0.3895 0.118 Uiso 1 1 calc R . . 
C3 C 1.2827(7) 0.2584(8) 0.2659(5) 0.078(3) Uani 1 1 d . . . 
H3A H 1.2452 0.3061 0.2395 0.116 Uiso 1 1 calc R . . 
H3B H 1.2773 0.1790 0.2372 0.116 Uiso 1 1 calc R . . 
H3C H 1.3675 0.2879 0.2785 0.116 Uiso 1 1 calc R . . 
C4 C 1.2761(7) 0.1876(7) 0.3720(5) 0.065(3) Uani 1 1 d . . . 
H4A H 1.2340 0.1898 0.4143 0.098 Uiso 1 1 calc R . . 
H4B H 1.3608 0.2170 0.3847 0.098 Uiso 1 1 calc R . . 
H4C H 1.2706 0.1083 0.3433 0.098 Uiso 1 1 calc R . . 
C5 C 1.0044(7) 0.5225(6) 0.1997(4) 0.038(2) Uani 1 1 d . . . 
C6 C 1.0311(9) 0.5833(7) 0.2763(5) 0.086(4) Uani 1 1 d . . . 
H6A H 1.1178 0.5889 0.2884 0.129 Uiso 1 1 calc R . . 
H6B H 0.9877 0.5397 0.3045 0.129 Uiso 1 1 calc R . . 
H6C H 1.0052 0.6606 0.2854 0.129 Uiso 1 1 calc R . . 
C7 C 0.8732(7) 0.5113(8) 0.1780(6) 0.091(4) Uani 1 1 d . . . 
H7A H 0.8597 0.4717 0.1284 0.137 Uiso 1 1 calc R . . 
H7B H 0.8456 0.5879 0.1861 0.137 Uiso 1 1 calc R . . 
H7C H 0.8282 0.4669 0.2052 0.137 Uiso 1 1 calc R . . 
C8 C 1.0771(7) 0.5879(6) 0.1558(4) 0.056(3) Uani 1 1 d . . . 
H8A H 1.1629 0.5946 0.1706 0.084 Uiso 1 1 calc R . . 
H8B H 1.0509 0.6648 0.1623 0.084 Uiso 1 1 calc R . . 
H8C H 1.0640 0.5461 0.1066 0.084 Uiso 1 1 calc R . . 
C11 C 1.0467(6) 0.0548(5) 0.1347(4) 0.0313(19) Uani 1 1 d . . . 
C12 C 1.1346(7) 0.0856(6) 0.0925(4) 0.0334(19) Uani 1 1 d . . . 
C13 C 1.2343(6) 0.0265(6) 0.0803(4) 0.034(2) Uani 1 1 d . . . 
H13A H 1.2912 0.0483 0.0509 0.041 Uiso 1 1 calc R . . 
C14 C 1.2554(6) -0.0648(6) 0.1097(4) 0.0322(19) Uani 1 1 d . . . 
C15 C 1.1695(6) -0.0922(5) 0.1525(4) 0.0310(19) Uani 1 1 d . . . 
H15A H 1.1820 -0.1522 0.1741 0.037 Uiso 1 1 calc R . . 
C16 C 1.0666(6) -0.0373(5) 0.1653(4) 0.0286(18) Uani 1 1 d . . . 
C21 C 0.7411(6) 0.2536(6) 0.3307(4) 0.0295(18) Uani 1 1 d . . . 
C22 C 0.7573(6) 0.1971(6) 0.3844(4) 0.035(2) Uani 1 1 d . . . 
C23 C 0.6748(6) 0.1036(6) 0.3848(4) 0.037(2) Uani 1 1 d . . . 
H23A H 0.6849 0.0660 0.4209 0.045 Uiso 1 1 calc R . . 
C24 C 0.5792(7) 0.0628(6) 0.3354(4) 0.038(2) Uani 1 1 d . . . 
C25 C 0.5656(6) 0.1194(6) 0.2831(4) 0.039(2) Uani 1 1 d . . . 
H25A H 0.5016 0.0922 0.2479 0.046 Uiso 1 1 calc R . . 
C26 C 0.6430(6) 0.2146(6) 0.2810(4) 0.0305(19) Uani 1 1 d . . . 
C121 C 1.1269(7) 0.1853(6) 0.0607(4) 0.0316(19) Uani 1 1 d . . . 
C122 C 1.0298(7) 0.1955(6) 0.0188(4) 0.044(2) Uani 1 1 d . . . 
H12A H 0.9618 0.1397 0.0112 0.053 Uiso 1 1 calc R . . 
C123 C 1.0286(8) 0.2861(7) -0.0130(4) 0.058(3) Uani 1 1 d . . . 
H12B H 0.9611 0.2911 -0.0425 0.069 Uiso 1 1 calc R . . 
C124 C 1.1261(9) 0.3678(7) -0.0010(4) 0.053(2) Uani 1 1 d . . . 
H12C H 1.1254 0.4306 -0.0215 0.063 Uiso 1 1 calc R . . 
C125 C 1.2249(8) 0.3593(6) 0.0407(5) 0.051(2) Uani 1 1 d . . . 
H12D H 1.2921 0.4161 0.0491 0.061 Uiso 1 1 calc R . . 
C126 C 1.2256(7) 0.2666(6) 0.0706(4) 0.040(2) Uani 1 1 d . . . 
H12E H 1.2949 0.2593 0.0981 0.049 Uiso 1 1 calc R . . 
C141 C 1.3627(6) -0.1277(6) 0.0967(4) 0.0332(19) Uani 1 1 d . . . 
C142 C 1.3581(7) -0.2441(6) 0.0944(4) 0.041(2) Uani 1 1 d . . . 
H14E H 1.2840 -0.2855 0.0989 0.050 Uiso 1 1 calc R . . 
C143 C 1.4607(8) -0.2994(7) 0.0856(4) 0.053(2) Uani 1 1 d . . . 
H14D H 1.4561 -0.3789 0.0837 0.063 Uiso 1 1 calc R . . 
C144 C 1.5699(8) -0.2418(8) 0.0794(4) 0.057(2) Uani 1 1 d . . . 
H14C H 1.6405 -0.2803 0.0746 0.068 Uiso 1 1 calc R . . 
C145 C 1.5745(7) -0.1273(8) 0.0804(4) 0.055(2) Uani 1 1 d . . . 
H14B H 1.6488 -0.0868 0.0753 0.066 Uiso 1 1 calc R . . 
C146 C 1.4735(7) -0.0714(7) 0.0887(4) 0.041(2) Uani 1 1 d . . . 
H14A H 1.4787 0.0075 0.0890 0.049 Uiso 1 1 calc R . . 
C161 C 0.9831(6) -0.0765(6) 0.2134(4) 0.0333(19) Uani 1 1 d . . . 
C162 C 0.8619(7) -0.1078(6) 0.1953(5) 0.049(2) Uani 1 1 d . . . 
H16E H 0.8287 -0.1030 0.1514 0.059 Uiso 1 1 calc R . . 
C163 C 0.7882(8) -0.1460(7) 0.2403(6) 0.066(3) Uani 1 1 d . . . 
H16D H 0.7050 -0.1680 0.2272 0.079 Uiso 1 1 calc R . . 
C164 C 0.8358(10) -0.1523(7) 0.3043(6) 0.067(3) Uani 1 1 d . . . 
H16C H 0.7843 -0.1762 0.3357 0.081 Uiso 1 1 calc R . . 
C165 C 0.9564(10) -0.1244(6) 0.3233(5) 0.061(3) Uani 1 1 d . . . 
H16A H 0.9891 -0.1312 0.3668 0.073 Uiso 1 1 calc R . . 
C166 C 1.0303(7) -0.0859(6) 0.2778(5) 0.048(2) Uani 1 1 d . . . 
H16B H 1.1138 -0.0657 0.2907 0.057 Uiso 1 1 calc R . . 
C221 C 0.8587(6) 0.2303(6) 0.4392(4) 0.0313(19) Uani 1 1 d . . . 
C222 C 0.9317(6) 0.1488(6) 0.4494(4) 0.036(2) Uani 1 1 d . . . 
H22E H 0.9159 0.0721 0.4214 0.043 Uiso 1 1 calc R . . 
C223 C 1.0276(7) 0.1765(7) 0.4995(4) 0.048(2) Uani 1 1 d . . . 
H22B H 1.0775 0.1195 0.5053 0.058 Uiso 1 1 calc R . . 
C224 C 1.0501(7) 0.2886(7) 0.5415(4) 0.048(2) Uani 1 1 d . . . 
H22C H 1.1150 0.3085 0.5764 0.058 Uiso 1 1 calc R . . 
C225 C 0.9779(8) 0.3698(7) 0.5320(4) 0.051(2) Uani 1 1 d . . . 
H22D H 0.9936 0.4463 0.5603 0.061 Uiso 1 1 calc R . . 
C226 C 0.8826(7) 0.3419(6) 0.4818(4) 0.039(2) Uani 1 1 d . . . 
H22A H 0.8330 0.3992 0.4763 0.047 Uiso 1 1 calc R . . 
C241 C 0.4918(6) -0.0357(6) 0.3400(4) 0.038(2) Uani 1 1 d . . . 
C242 C 0.4497(7) -0.0400(8) 0.4035(5) 0.064(3) Uani 1 1 d . . . 
H24E H 0.4765 0.0194 0.4441 0.077 Uiso 1 1 calc R . . 
C243 C 0.3681(9) -0.1309(9) 0.4083(6) 0.095(4) Uani 1 1 d . . . 
H24C H 0.3397 -0.1333 0.4521 0.114 Uiso 1 1 calc R . . 
C244 C 0.3287(9) -0.2166(9) 0.3507(6) 0.093(4) Uani 1 1 d . . . 
H24B H 0.2748 -0.2796 0.3547 0.111 Uiso 1 1 calc R . . 
C245 C 0.3671(8) -0.2118(8) 0.2863(5) 0.074(3) Uani 1 1 d . . . 
H24A H 0.3373 -0.2701 0.2458 0.089 Uiso 1 1 calc R . . 
C246 C 0.4488(7) -0.1222(7) 0.2809(4) 0.050(2) Uani 1 1 d . . . 
H24D H 0.4757 -0.1196 0.2367 0.060 Uiso 1 1 calc R . . 
C261 C 0.6183(6) 0.2734(6) 0.2248(4) 0.035(2) Uani 1 1 d . . . 
C262 C 0.5801(6) 0.3827(7) 0.2399(4) 0.045(2) Uani 1 1 d . . . 
H26E H 0.5730 0.4219 0.2871 0.054 Uiso 1 1 calc R . . 
C263 C 0.5521(7) 0.4359(7) 0.1881(5) 0.053(2) Uani 1 1 d . . . 
H26D H 0.5261 0.5106 0.1998 0.064 Uiso 1 1 calc R . . 
C264 C 0.5622(7) 0.3795(8) 0.1195(5) 0.056(3) Uani 1 1 d . . . 
H26C H 0.5421 0.4149 0.0836 0.067 Uiso 1 1 calc R . . 
C265 C 0.6014(7) 0.2723(8) 0.1030(4) 0.051(2) Uani 1 1 d . . . 
H26B H 0.6100 0.2343 0.0558 0.061 Uiso 1 1 calc R . . 
C266 C 0.6287(6) 0.2188(6) 0.1556(4) 0.039(2) Uani 1 1 d . . . 
H26A H 0.6546 0.1441 0.1437 0.047 Uiso 1 1 calc R . . 
C1S C 0.5398(11) 0.5787(12) 0.4635(6) 0.086(3) Uani 1 1 d D . . 
H1SA H 0.5661 0.6321 0.4382 0.103 Uiso 0.50 1 calc PR A 1 
C4S C 0.588(2) 0.664(2) 0.4249(14) 0.129(10) Uani 0.50 1 d PD B 2 
H4SA H 0.6410 0.6277 0.3902 0.194 Uiso 0.50 1 calc PR B 2 
H4SB H 0.6325 0.7307 0.4579 0.194 Uiso 0.50 1 calc PR B 2 
H4SC H 0.5202 0.6895 0.4014 0.194 Uiso 0.50 1 calc PR B 2 
C2S C 0.5824(9) 0.4740(14) 0.4515(6) 0.083(4) Uani 1 1 d . . . 
H2SA H 0.6406 0.4556 0.4183 0.100 Uiso 1 1 calc R . . 
C3S C 0.4566(11) 0.6061(11) 0.5138(7) 0.090(4) Uani 1 1 d . . . 
H3SA H 0.4272 0.6793 0.5239 0.109 Uiso 1 1 calc R . . 
 
loop_ 
 _atom_site_aniso_label 
 _atom_site_aniso_U_11 
 _atom_site_aniso_U_22 
 _atom_site_aniso_U_33 
 _atom_site_aniso_U_23 
 _atom_site_aniso_U_13 
 _atom_site_aniso_U_12 
Fe1 0.0311(6) 0.0286(6) 0.0356(8) 0.0101(5) 0.0069(5) 0.0048(5) 
S1 0.0311(11) 0.0345(11) 0.0463(15) 0.0069(10) 0.0007(10) 0.0086(9) 
S2 0.0362(12) 0.0333(11) 0.0338(14) 0.0076(9) 0.0057(10) 0.0046(9) 
N1 0.023(4) 0.054(5) 0.045(5) 0.018(4) 0.005(3) 0.009(3) 
N2 0.064(6) 0.034(4) 0.062(7) 0.017(4) 0.030(4) 0.008(4) 
C1 0.026(5) 0.045(5) 0.050(6) 0.012(4) -0.003(4) 0.008(4) 
C2 0.071(7) 0.063(6) 0.085(9) -0.004(6) -0.043(6) 0.010(5) 
C3 0.040(5) 0.127(9) 0.084(9) 0.059(7) 0.016(6) 0.011(6) 
C4 0.056(6) 0.069(6) 0.078(8) 0.030(6) -0.009(5) 0.021(5) 
C5 0.053(6) 0.018(4) 0.043(6) 0.009(4) 0.008(4) 0.002(4) 
C6 0.157(10) 0.042(6) 0.055(8) 0.011(5) 0.019(7) -0.017(6) 
C7 0.051(6) 0.130(9) 0.128(11) 0.101(8) -0.008(6) 0.009(6) 
C8 0.067(6) 0.038(5) 0.070(7) 0.031(5) 0.011(5) -0.002(4) 
C11 0.028(4) 0.027(4) 0.036(5) 0.002(4) 0.005(4) 0.002(4) 
C12 0.037(5) 0.029(4) 0.032(5) 0.005(4) 0.001(4) 0.000(4) 
C13 0.037(5) 0.034(5) 0.033(5) 0.011(4) 0.007(4) 0.003(4) 
C14 0.027(4) 0.036(5) 0.030(5) 0.001(4) 0.008(4) 0.004(4) 
C15 0.033(5) 0.026(4) 0.032(5) 0.004(4) -0.006(4) 0.006(4) 
C16 0.032(5) 0.027(4) 0.025(5) 0.004(3) -0.003(4) 0.007(4) 
C21 0.030(4) 0.036(4) 0.020(5) 0.003(4) -0.001(4) 0.006(4) 
C22 0.028(4) 0.039(5) 0.036(6) 0.005(4) 0.004(4) 0.009(4) 
C23 0.051(5) 0.036(5) 0.027(5) 0.010(4) 0.005(4) 0.001(4) 
C24 0.039(5) 0.040(5) 0.034(6) 0.007(4) -0.003(4) 0.002(4) 
C25 0.035(5) 0.050(5) 0.028(6) 0.008(4) -0.009(4) 0.005(4) 
C26 0.032(5) 0.031(4) 0.032(5) 0.012(4) 0.009(4) 0.008(4) 
C121 0.036(5) 0.030(4) 0.029(5) 0.006(4) 0.009(4) 0.007(4) 
C122 0.053(6) 0.040(5) 0.038(6) 0.009(4) -0.004(5) 0.001(4) 
C123 0.077(7) 0.050(6) 0.045(7) 0.014(5) -0.022(5) 0.009(5) 
C124 0.089(7) 0.041(5) 0.035(6) 0.020(4) 0.006(5) 0.014(5) 
C125 0.059(6) 0.045(5) 0.055(7) 0.022(5) 0.014(5) 0.001(5) 
C126 0.044(5) 0.042(5) 0.041(6) 0.013(4) 0.017(4) 0.016(4) 
C141 0.032(5) 0.048(5) 0.020(5) 0.008(4) 0.004(4) 0.009(4) 
C142 0.043(5) 0.040(5) 0.045(6) 0.013(4) 0.010(4) 0.011(4) 
C143 0.055(6) 0.058(6) 0.049(7) 0.015(5) 0.006(5) 0.022(5) 
C144 0.051(6) 0.083(7) 0.044(7) 0.018(5) 0.015(5) 0.037(5) 
C145 0.038(6) 0.083(7) 0.049(7) 0.027(5) 0.001(5) 0.010(5) 
C146 0.037(5) 0.050(5) 0.039(6) 0.015(4) 0.000(4) 0.010(5) 
C161 0.035(5) 0.032(4) 0.033(6) 0.005(4) 0.010(4) 0.011(4) 
C162 0.038(5) 0.050(5) 0.066(7) 0.026(5) 0.012(5) 0.007(4) 
C163 0.051(6) 0.051(6) 0.104(10) 0.029(6) 0.025(7) 0.012(5) 
C164 0.084(8) 0.054(6) 0.078(9) 0.028(6) 0.049(7) 0.023(6) 
C165 0.107(8) 0.038(5) 0.049(7) 0.021(5) 0.034(6) 0.024(6) 
C166 0.057(6) 0.028(5) 0.058(7) 0.011(4) 0.002(5) 0.010(4) 
C221 0.026(4) 0.036(5) 0.034(5) 0.012(4) 0.005(4) 0.006(4) 
C222 0.037(5) 0.034(5) 0.037(6) 0.009(4) 0.004(4) 0.008(4) 
C223 0.044(5) 0.057(6) 0.053(7) 0.026(5) 0.001(5) 0.016(5) 
C224 0.055(6) 0.055(6) 0.033(6) 0.017(5) -0.011(4) -0.006(5) 
C225 0.071(6) 0.039(5) 0.040(6) 0.007(4) -0.004(5) -0.003(5) 
C226 0.050(5) 0.042(5) 0.023(5) 0.006(4) 0.004(4) 0.003(4) 
C241 0.032(5) 0.049(5) 0.037(6) 0.018(4) -0.003(4) 0.002(4) 
C242 0.068(6) 0.082(7) 0.041(7) 0.024(5) -0.004(5) -0.020(6) 
C243 0.116(9) 0.109(9) 0.053(8) 0.035(7) -0.013(7) -0.054(8) 
C244 0.089(8) 0.103(9) 0.085(10) 0.056(8) -0.042(7) -0.057(7) 
C245 0.082(7) 0.076(7) 0.058(8) 0.027(6) -0.038(6) -0.039(6) 
C246 0.048(5) 0.063(6) 0.035(6) 0.012(5) -0.015(4) -0.006(5) 
C261 0.028(4) 0.039(5) 0.039(6) 0.017(4) -0.003(4) -0.005(4) 
C262 0.045(5) 0.052(6) 0.042(6) 0.019(5) 0.002(4) 0.005(4) 
C263 0.044(5) 0.054(6) 0.071(8) 0.029(6) -0.003(5) 0.017(4) 
C264 0.051(6) 0.074(7) 0.056(8) 0.041(6) -0.002(5) 0.005(5) 
C265 0.047(5) 0.073(7) 0.034(6) 0.018(5) -0.008(4) 0.006(5) 
C266 0.037(5) 0.048(5) 0.034(6) 0.013(4) -0.004(4) 0.007(4) 
C1S 0.061(8) 0.109(11) 0.071(10) -0.009(7) -0.007(7) 0.028(7) 
C4S 0.100(19) 0.14(2) 0.16(3) 0.05(2) -0.016(18) 0.042(17) 
C2S 0.057(7) 0.128(11) 0.051(9) -0.012(8) -0.004(6) 0.042(8) 
C3S 0.069(8) 0.106(10) 0.073(10) -0.025(8) -0.031(7) 0.043(8) 
 
_geom_special_details 
; 
 All esds (except the esd in the dihedral angle between two l.s. planes) 
 are estimated using the full covariance matrix.  The cell esds are taken 
 into account individually in the estimation of esds in distances, angles 
 and torsion angles; correlations between esds in cell parameters are only 
 used when they are defined by crystal symmetry.  An approximate (isotropic) 
 treatment of cell esds is used for estimating esds involving l.s. planes. 
; 
 
loop_ 
 _geom_bond_atom_site_label_1 
 _geom_bond_atom_site_label_2 
 _geom_bond_distance 
 _geom_bond_site_symmetry_2 
 _geom_bond_publ_flag 
Fe1 N1 2.124(6) . ? 
Fe1 N2 2.136(5) . ? 
Fe1 S2 2.317(2) . ? 
Fe1 S1 2.324(2) . ? 
S1 C11 1.784(7) . ? 
S2 C21 1.782(7) . ? 
N1 C1 1.492(8) . ? 
N2 C5 1.484(8) . ? 
C1 C3 1.510(11) . ? 
C1 C4 1.518(10) . ? 
C1 C2 1.524(10) . ? 
C5 C7 1.494(10) . ? 
C5 C6 1.518(10) . ? 
C5 C8 1.535(9) . ? 
C11 C12 1.410(9) . ? 
C11 C16 1.427(9) . ? 
C12 C13 1.377(9) . ? 
C12 C121 1.505(9) . ? 
C13 C14 1.407(9) . ? 
C14 C15 1.387(9) . ? 
C14 C141 1.478(9) . ? 
C15 C16 1.383(9) . ? 
C16 C161 1.500(9) . ? 
C21 C26 1.404(9) . ? 
C21 C22 1.419(9) . ? 
C22 C23 1.397(8) . ? 
C22 C221 1.488(10) . ? 
C23 C24 1.383(9) . ? 
C24 C25 1.394(10) . ? 
C24 C241 1.497(9) . ? 
C25 C26 1.388(8) . ? 
C26 C261 1.499(10) . ? 
C121 C122 1.370(10) . ? 
C121 C126 1.383(9) . ? 
C122 C123 1.400(10) . ? 
C123 C124 1.373(10) . ? 
C124 C125 1.377(10) . ? 
C125 C126 1.396(10) . ? 
C141 C142 1.394(9) . ? 
C141 C146 1.396(9) . ? 
C142 C143 1.376(10) . ? 
C143 C144 1.377(10) . ? 
C144 C145 1.377(10) . ? 
C145 C146 1.364(10) . ? 
C161 C162 1.380(9) . ? 
C161 C166 1.397(10) . ? 
C162 C163 1.382(11) . ? 
C163 C164 1.380(12) . ? 
C164 C165 1.373(12) . ? 
C165 C166 1.392(10) . ? 
C221 C222 1.382(9) . ? 
C221 C226 1.396(9) . ? 
C222 C223 1.386(10) . ? 
C223 C224 1.396(10) . ? 
C224 C225 1.369(10) . ? 
C225 C226 1.383(10) . ? 
C241 C242 1.384(10) . ? 
C241 C246 1.393(10) . ? 
C242 C243 1.390(10) . ? 
C243 C244 1.360(13) . ? 
C244 C245 1.386(12) . ? 
C245 C246 1.382(10) . ? 
C261 C266 1.384(10) . ? 
C261 C262 1.391(10) . ? 
C262 C263 1.384(10) . ? 
C263 C264 1.380(11) . ? 
C264 C265 1.372(11) . ? 
C265 C266 1.398(10) . ? 
C1S C2S 1.362(14) . ? 
C1S C3S 1.399(14) . ? 
C1S C4S 1.514(19) . ? 
C2S C3S 1.379(14) 2_666 ? 
C3S C2S 1.379(14) 2_666 ? 
 
loop_ 
 _geom_angle_atom_site_label_1 
 _geom_angle_atom_site_label_2 
 _geom_angle_atom_site_label_3 
 _geom_angle 
 _geom_angle_site_symmetry_1 
 _geom_angle_site_symmetry_3 
 _geom_angle_publ_flag 
N1 Fe1 N2 119.9(3) . . ? 
N1 Fe1 S2 101.47(19) . . ? 
N2 Fe1 S2 109.41(19) . . ? 
N1 Fe1 S1 102.5(2) . . ? 
N2 Fe1 S1 100.2(2) . . ? 
S2 Fe1 S1 124.61(8) . . ? 
C11 S1 Fe1 105.1(2) . . ? 
C21 S2 Fe1 102.7(2) . . ? 
C1 N1 Fe1 127.0(5) . . ? 
C5 N2 Fe1 124.2(5) . . ? 
N1 C1 C3 106.2(6) . . ? 
N1 C1 C4 112.0(6) . . ? 
C3 C1 C4 109.6(7) . . ? 
N1 C1 C2 107.2(6) . . ? 
C3 C1 C2 111.4(7) . . ? 
C4 C1 C2 110.4(7) . . ? 
N2 C5 C7 108.6(6) . . ? 
N2 C5 C6 106.1(7) . . ? 
C7 C5 C6 112.0(8) . . ? 
N2 C5 C8 110.4(6) . . ? 
C7 C5 C8 110.3(7) . . ? 
C6 C5 C8 109.3(6) . . ? 
C12 C11 C16 117.6(7) . . ? 
C12 C11 S1 122.5(6) . . ? 
C16 C11 S1 119.8(5) . . ? 
C13 C12 C11 120.6(6) . . ? 
C13 C12 C121 117.0(6) . . ? 
C11 C12 C121 122.4(7) . . ? 
C12 C13 C14 122.7(7) . . ? 
C15 C14 C13 116.0(7) . . ? 
C15 C14 C141 121.5(7) . . ? 
C13 C14 C141 122.5(6) . . ? 
C16 C15 C14 123.7(7) . . ? 
C15 C16 C11 119.4(6) . . ? 
C15 C16 C161 117.1(6) . . ? 
C11 C16 C161 123.5(7) . . ? 
C26 C21 C22 119.2(6) . . ? 
C26 C21 S2 119.8(5) . . ? 
C22 C21 S2 121.0(5) . . ? 
C23 C22 C21 118.0(7) . . ? 
C23 C22 C221 118.2(7) . . ? 
C21 C22 C221 123.7(6) . . ? 
C24 C23 C22 123.4(7) . . ? 
C23 C24 C25 117.5(7) . . ? 
C23 C24 C241 120.8(7) . . ? 
C25 C24 C241 121.7(7) . . ? 
C26 C25 C24 121.7(7) . . ? 
C25 C26 C21 120.2(7) . . ? 
C25 C26 C261 118.1(6) . . ? 
C21 C26 C261 121.7(6) . . ? 
C122 C121 C126 118.5(7) . . ? 
C122 C121 C12 123.1(6) . . ? 
C126 C121 C12 118.3(7) . . ? 
C121 C122 C123 121.5(7) . . ? 
C124 C123 C122 119.2(8) . . ? 
C123 C124 C125 120.4(7) . . ? 
C124 C125 C126 119.6(7) . . ? 
C121 C126 C125 120.8(8) . . ? 
C142 C141 C146 117.6(7) . . ? 
C142 C141 C14 121.4(6) . . ? 
C146 C141 C14 121.0(7) . . ? 
C143 C142 C141 120.2(7) . . ? 
C142 C143 C144 121.4(8) . . ? 
C143 C144 C145 118.6(8) . . ? 
C146 C145 C144 120.7(8) . . ? 
C145 C146 C141 121.4(7) . . ? 
C162 C161 C166 118.7(7) . . ? 
C162 C161 C16 122.3(7) . . ? 
C166 C161 C16 119.0(7) . . ? 
C161 C162 C163 120.7(8) . . ? 
C164 C163 C162 119.8(9) . . ? 
C165 C164 C163 120.9(8) . . ? 
C164 C165 C166 118.9(9) . . ? 
C165 C166 C161 120.9(8) . . ? 
C222 C221 C226 118.1(7) . . ? 
C222 C221 C22 119.7(7) . . ? 
C226 C221 C22 122.1(7) . . ? 
C221 C222 C223 121.5(7) . . ? 
C222 C223 C224 119.4(8) . . ? 
C225 C224 C223 119.5(8) . . ? 
C224 C225 C226 120.9(8) . . ? 
C225 C226 C221 120.5(8) . . ? 
C242 C241 C246 118.9(7) . . ? 
C242 C241 C24 119.8(7) . . ? 
C246 C241 C24 121.3(7) . . ? 
C241 C242 C243 120.2(8) . . ? 
C244 C243 C242 120.7(10) . . ? 
C243 C244 C245 119.9(9) . . ? 
C246 C245 C244 120.1(8) . . ? 
C245 C246 C241 120.2(8) . . ? 
C266 C261 C262 117.8(7) . . ? 
C266 C261 C26 120.9(7) . . ? 
C262 C261 C26 121.3(7) . . ? 
C263 C262 C261 121.8(8) . . ? 
C264 C263 C262 119.4(9) . . ? 
C265 C264 C263 120.1(8) . . ? 
C264 C265 C266 120.1(8) . . ? 
C261 C266 C265 120.7(8) . . ? 
C2S C1S C3S 118.8(12) . . ? 
C2S C1S C4S 119.5(17) . . ? 
C3S C1S C4S 121.7(18) . . ? 
C1S C2S C3S 121.7(11) . 2_666 ? 
C2S C3S C1S 119.5(12) 2_666 . ? 
 
loop_ 
 _geom_torsion_atom_site_label_1 
 _geom_torsion_atom_site_label_2 
 _geom_torsion_atom_site_label_3 
 _geom_torsion_atom_site_label_4 
 _geom_torsion 
 _geom_torsion_site_symmetry_1 
 _geom_torsion_site_symmetry_2 
 _geom_torsion_site_symmetry_3 
 _geom_torsion_site_symmetry_4 
 _geom_torsion_publ_flag 
N1 Fe1 S1 C11 -38.2(3) . . . . ? 
N2 Fe1 S1 C11 85.8(3) . . . . ? 
S2 Fe1 S1 C11 -151.8(2) . . . . ? 
N1 Fe1 S2 C21 -81.0(3) . . . . ? 
N2 Fe1 S2 C21 151.3(4) . . . . ? 
S1 Fe1 S2 C21 33.2(3) . . . . ? 
N2 Fe1 N1 C1 12.7(7) . . . . ? 
S2 Fe1 N1 C1 -107.8(6) . . . . ? 
S1 Fe1 N1 C1 122.5(6) . . . . ? 
N1 Fe1 N2 C5 -122.0(7) . . . . ? 
S2 Fe1 N2 C5 -5.5(8) . . . . ? 
S1 Fe1 N2 C5 127.0(7) . . . . ? 
Fe1 N1 C1 C3 -56.9(8) . . . . ? 
Fe1 N1 C1 C4 -176.6(6) . . . . ? 
Fe1 N1 C1 C2 62.2(8) . . . . ? 
Fe1 N2 C5 C7 -61.5(9) . . . . ? 
Fe1 N2 C5 C6 59.0(8) . . . . ? 
Fe1 N2 C5 C8 177.4(5) . . . . ? 
Fe1 S1 C11 C12 -85.2(6) . . . . ? 
Fe1 S1 C11 C16 94.3(5) . . . . ? 
C16 C11 C12 C13 1.5(10) . . . . ? 
S1 C11 C12 C13 -179.0(5) . . . . ? 
C16 C11 C12 C121 -176.6(6) . . . . ? 
S1 C11 C12 C121 3.0(10) . . . . ? 
C11 C12 C13 C14 -1.2(11) . . . . ? 
C121 C12 C13 C14 176.9(7) . . . . ? 
C12 C13 C14 C15 -0.3(10) . . . . ? 
C12 C13 C14 C141 -179.8(7) . . . . ? 
C13 C14 C15 C16 1.6(10) . . . . ? 
C141 C14 C15 C16 -178.9(6) . . . . ? 
C14 C15 C16 C11 -1.4(11) . . . . ? 
C14 C15 C16 C161 -179.4(6) . . . . ? 
C12 C11 C16 C15 -0.2(10) . . . . ? 
S1 C11 C16 C15 -179.8(5) . . . . ? 
C12 C11 C16 C161 177.7(6) . . . . ? 
S1 C11 C16 C161 -1.9(9) . . . . ? 
Fe1 S2 C21 C26 -82.8(6) . . . . ? 
Fe1 S2 C21 C22 96.5(6) . . . . ? 
C26 C21 C22 C23 0.6(10) . . . . ? 
S2 C21 C22 C23 -178.6(5) . . . . ? 
C26 C21 C22 C221 179.3(6) . . . . ? 
S2 C21 C22 C221 0.1(10) . . . . ? 
C21 C22 C23 C24 0.7(11) . . . . ? 
C221 C22 C23 C24 -178.1(7) . . . . ? 
C22 C23 C24 C25 -0.3(11) . . . . ? 
C22 C23 C24 C241 -178.2(7) . . . . ? 
C23 C24 C25 C26 -1.3(11) . . . . ? 
C241 C24 C25 C26 176.5(7) . . . . ? 
C24 C25 C26 C21 2.6(11) . . . . ? 
C24 C25 C26 C261 -177.2(7) . . . . ? 
C22 C21 C26 C25 -2.2(10) . . . . ? 
S2 C21 C26 C25 177.0(5) . . . . ? 
C22 C21 C26 C261 177.6(7) . . . . ? 
S2 C21 C26 C261 -3.1(10) . . . . ? 
C13 C12 C121 C122 125.8(8) . . . . ? 
C11 C12 C121 C122 -56.1(11) . . . . ? 
C13 C12 C121 C126 -50.0(9) . . . . ? 
C11 C12 C121 C126 128.1(7) . . . . ? 
C126 C121 C122 C123 -0.7(12) . . . . ? 
C12 C121 C122 C123 -176.4(7) . . . . ? 
C121 C122 C123 C124 -1.1(13) . . . . ? 
C122 C123 C124 C125 1.3(13) . . . . ? 
C123 C124 C125 C126 0.2(13) . . . . ? 
C122 C121 C126 C125 2.3(11) . . . . ? 
C12 C121 C126 C125 178.2(7) . . . . ? 
C124 C125 C126 C121 -2.1(12) . . . . ? 
C15 C14 C141 C142 33.0(11) . . . . ? 
C13 C14 C141 C142 -147.5(7) . . . . ? 
C15 C14 C141 C146 -144.7(7) . . . . ? 
C13 C14 C141 C146 34.7(10) . . . . ? 
C146 C141 C142 C143 1.0(11) . . . . ? 
C14 C141 C142 C143 -176.8(7) . . . . ? 
C141 C142 C143 C144 0.5(12) . . . . ? 
C142 C143 C144 C145 -1.7(13) . . . . ? 
C143 C144 C145 C146 1.2(13) . . . . ? 
C144 C145 C146 C141 0.3(13) . . . . ? 
C142 C141 C146 C145 -1.4(11) . . . . ? 
C14 C141 C146 C145 176.4(7) . . . . ? 
C15 C16 C161 C162 -127.6(7) . . . . ? 
C11 C16 C161 C162 54.4(10) . . . . ? 
C15 C16 C161 C166 50.0(9) . . . . ? 
C11 C16 C161 C166 -128.0(8) . . . . ? 
C166 C161 C162 C163 0.9(11) . . . . ? 
C16 C161 C162 C163 178.5(7) . . . . ? 
C161 C162 C163 C164 0.5(12) . . . . ? 
C162 C163 C164 C165 -2.0(14) . . . . ? 
C163 C164 C165 C166 2.1(13) . . . . ? 
C164 C165 C166 C161 -0.6(12) . . . . ? 
C162 C161 C166 C165 -0.9(11) . . . . ? 
C16 C161 C166 C165 -178.6(6) . . . . ? 
C23 C22 C221 C222 53.2(9) . . . . ? 
C21 C22 C221 C222 -125.5(8) . . . . ? 
C23 C22 C221 C226 -126.3(7) . . . . ? 
C21 C22 C221 C226 55.1(10) . . . . ? 
C226 C221 C222 C223 -1.0(11) . . . . ? 
C22 C221 C222 C223 179.5(6) . . . . ? 
C221 C222 C223 C224 0.9(11) . . . . ? 
C222 C223 C224 C225 -0.7(11) . . . . ? 
C223 C224 C225 C226 0.5(12) . . . . ? 
C224 C225 C226 C221 -0.6(12) . . . . ? 
C222 C221 C226 C225 0.9(10) . . . . ? 
C22 C221 C226 C225 -179.6(7) . . . . ? 
C23 C24 C241 C242 43.3(11) . . . . ? 
C25 C24 C241 C242 -134.5(8) . . . . ? 
C23 C24 C241 C246 -138.7(8) . . . . ? 
C25 C24 C241 C246 43.5(11) . . . . ? 
C246 C241 C242 C243 1.6(13) . . . . ? 
C24 C241 C242 C243 179.7(8) . . . . ? 
C241 C242 C243 C244 -0.1(15) . . . . ? 
C242 C243 C244 C245 -1.9(17) . . . . ? 
C243 C244 C245 C246 2.3(16) . . . . ? 
C244 C245 C246 C241 -0.7(13) . . . . ? 
C242 C241 C246 C245 -1.2(12) . . . . ? 
C24 C241 C246 C245 -179.3(7) . . . . ? 
C25 C26 C261 C266 -66.7(9) . . . . ? 
C21 C26 C261 C266 113.5(8) . . . . ? 
C25 C26 C261 C262 111.0(8) . . . . ? 
C21 C26 C261 C262 -68.9(9) . . . . ? 
C266 C261 C262 C263 0.5(10) . . . . ? 
C26 C261 C262 C263 -177.2(7) . . . . ? 
C261 C262 C263 C264 0.0(11) . . . . ? 
C262 C263 C264 C265 -0.9(12) . . . . ? 
C263 C264 C265 C266 1.4(12) . . . . ? 
C262 C261 C266 C265 0.0(10) . . . . ? 
C26 C261 C266 C265 177.7(6) . . . . ? 
C264 C265 C266 C261 -0.9(11) . . . . ? 
C3S C1S C2S C3S 1.7(18) . . . 2_666 ? 
C4S C1S C2S C3S 178.8(14) . . . 2_666 ? 
C2S C1S C3S C2S -1.6(18) . . . 2_666 ? 
C4S C1S C3S C2S -178.7(14) . . . 2_666 ? 
 
 
data_2_c7h8 
 
_audit_creation_method            SHELXL-97 
_chemical_name_systematic 
; 
 ? 
; 
_chemical_name_common             't-butly amine adduct, (2 . C7H8)' 
_chemical_melting_point           'not determined' 
_chemical_formula_moiety          
'(Fe 2+)(S C24 H17 1-)2 (N C4 H11)2, (C7 H8)'
_chemical_formula_structural      
'[(Fe)(SC24H17)2(NC4H11)2], (C7H8)'  
_chemical_formula_sum 
 'C56 H56 Fe N2 S2' 
_chemical_formula_weight          877.00 
_chemical_compound_source         'Synthesis, S. C. Lee Lab'
 
loop_ 
 _atom_type_symbol 
 _atom_type_description 
 _atom_type_scat_dispersion_real 
 _atom_type_scat_dispersion_imag 
 _atom_type_scat_source 
 'C'  'C'   0.0033   0.0016 
 'International Tables Vol C Tables 4.2.6.8 and 6.1.1.4' 
 'H'  'H'   0.0000   0.0000 
 'International Tables Vol C Tables 4.2.6.8 and 6.1.1.4' 
 'N'  'N'   0.0061   0.0033 
 'International Tables Vol C Tables 4.2.6.8 and 6.1.1.4' 
 'S'  'S'   0.1246   0.1234 
 'International Tables Vol C Tables 4.2.6.8 and 6.1.1.4' 
 'Fe'  'Fe'   0.3463   0.8444 
 'International Tables Vol C Tables 4.2.6.8 and 6.1.1.4' 
 
_symmetry_cell_setting            'orthorhombic' 
_symmetry_space_group_name_H-M    Pbca 
 
loop_ 
 _symmetry_equiv_pos_as_xyz 
 'x, y, z' 
 '-x+1/2, -y, z+1/2' 
 '-x, y+1/2, -z+1/2' 
 'x+1/2, -y+1/2, -z' 
 '-x, -y, -z' 
 'x-1/2, y, -z-1/2' 
 'x, -y-1/2, z-1/2' 
 '-x-1/2, y-1/2, z' 
 
_cell_length_a                    12.229(2) 
_cell_length_b                    20.175(4) 
_cell_length_c                    43.619(9) 
_cell_angle_alpha                 90.00 
_cell_angle_beta                  90.00 
_cell_angle_gamma                 90.00 
_cell_volume                      10761(4) 
_cell_formula_units_Z             8 
_cell_measurement_temperature     200(2) 
_cell_measurement_reflns_used     18750 
_cell_measurement_theta_min       1.91 
_cell_measurement_theta_max       21.42 
 
_exptl_crystal_description        'plate'
_exptl_crystal_colour             'yellow' 
_exptl_crystal_size_max           0.40 
_exptl_crystal_size_mid           0.22 
_exptl_crystal_size_min           0.03 
_exptl_crystal_density_meas       ? 
_exptl_crystal_density_diffrn     1.083 
_exptl_crystal_density_method     'not measured' 
_exptl_crystal_F_000              3712 
_exptl_absorpt_coefficient_mu     0.392 
_exptl_absorpt_correction_type    'none' 
_exptl_absorpt_correction_T_min   ? 
_exptl_absorpt_correction_T_max   ? 
_exptl_absorpt_process_details    ? 
 
_exptl_special_details 
; 
 ? 
; 
 
_diffrn_ambient_temperature       200(2) 
_diffrn_radiation_wavelength      0.71073 
_diffrn_radiation_type            MoK\a 
_diffrn_radiation_source          'fine-focus sealed tube' 
_diffrn_radiation_monochromator   graphite 
_diffrn_measurement_device_type   'Nonius KappaCCD' 
_diffrn_measurement_method        '\w scans' 
_diffrn_detector_area_resol_mean  ? 
_diffrn_standards_number          0 
_diffrn_standards_interval_count  ? 
_diffrn_standards_interval_time   ? 
_diffrn_standards_decay_%         ? 
_diffrn_reflns_number             18750 
_diffrn_reflns_av_R_equivalents   0.1210 
_diffrn_reflns_av_sigmaI/netI     0.1137 
_diffrn_reflns_limit_h_min        0 
_diffrn_reflns_limit_h_max        12 
_diffrn_reflns_limit_k_min        0 
_diffrn_reflns_limit_k_max        20 
_diffrn_reflns_limit_l_min        0 
_diffrn_reflns_limit_l_max        44 
_diffrn_reflns_theta_min          1.91 
_diffrn_reflns_theta_max          21.42 
_diffrn_measured_fraction_theta_max    0.983 
_diffrn_reflns_theta_full              21.42 
_diffrn_measured_fraction_theta_full   0.983 
_refine_diff_density_max    1.919 
_refine_diff_density_min   -0.464 
_refine_diff_density_rms    0.092 
_reflns_number_total              6018 
_reflns_number_gt                 3710 
_reflns_threshold_expression      >2sigma(I) 
 
_computing_data_collection        'NONIUS COLLECT'
_computing_cell_refinement        'DENZO-SMN'
_computing_data_reduction         'DENZO-SMN, Platon, Siemens SHELXTL'
_computing_structure_solution     'Siemens SHELXTL'
_computing_structure_refinement   'Siemens SHELXTL'
_computing_molecular_graphics     'Siemens SHELXTL'
_computing_publication_material   'CIFTAB, Siemens SHELXTL' 

_refine_special_details 
; 
 Refinement of F^2^ against ALL reflections.  The weighted R-factor wR and 
 goodness of fit S are based on F^2^, conventional R-factors R are based 
 on F, with F set to zero for negative F^2^. The threshold expression of 
 F^2^ > 2sigma(F^2^) is used only for calculating R-factors(gt) etc. and is 
 not relevant to the choice of reflections for refinement.  R-factors based 
 on F^2^ are statistically about twice as large as those based on F, and R- 
 factors based on ALL data will be even larger. 
; 
 
_refine_ls_structure_factor_coef  Fsqd  
_refine_ls_matrix_type            full 
_refine_ls_weighting_scheme       calc  
_refine_ls_weighting_details 
 'calc w=1/[\s^2^(Fo^2^)+(0.1575P)^2^+0.0000P] where P=(Fo^2^+2Fc^2^)/3' 
_atom_sites_solution_primary      direct 
_atom_sites_solution_secondary    difmap 
_atom_sites_solution_hydrogens    geom 
_refine_ls_hydrogen_treatment     mixed 
_refine_ls_extinction_method      none 
_refine_ls_extinction_coef        ? 
_refine_ls_number_reflns          6018 
_refine_ls_number_parameters      557 
_refine_ls_number_restraints      0 
_refine_ls_R_factor_all           0.1436 
_refine_ls_R_factor_gt            0.0976 
_refine_ls_wR_factor_ref          0.2638 
_refine_ls_wR_factor_gt           0.2397 
_refine_ls_goodness_of_fit_ref    1.046 
_refine_ls_restrained_S_all       1.046 
_refine_ls_shift/su_max           0.000 
_refine_ls_shift/su_mean          0.000 
 
loop_ 
 _atom_site_label 
 _atom_site_type_symbol 
 _atom_site_fract_x 
 _atom_site_fract_y 
 _atom_site_fract_z 
 _atom_site_U_iso_or_equiv 
 _atom_site_adp_type 
 _atom_site_occupancy 
 _atom_site_symmetry_multiplicity 
 _atom_site_calc_flag 
 _atom_site_refinement_flags 
 _atom_site_disorder_assembly 
 _atom_site_disorder_group 
Fe1 Fe 0.87533(8) 0.19288(6) 0.10582(3) 0.0458(4) Uani 1 1 d . . . 
N1 N 0.9957(4) 0.1328(3) 0.12772(17) 0.0499(19) Uani 1 1 d . . . 
H1 H 1.0604 0.1423 0.1179 0.075 Uiso 1 1 calc R . . 
H2 H 1.0023 0.1495 0.1472 0.075 Uiso 1 1 calc R . . 
N2 N 0.7556(6) 0.1809(4) 0.07141(18) 0.047(2) Uani 1 1 d . . . 
H4 H 0.786(6) 0.177(4) 0.0579(19) 0.040 Uiso 1 1 d . . . 
H3 H 0.729(6) 0.226(4) 0.0711(18) 0.05(2) Uiso 1 1 d . . . 
S1 S 0.77195(16) 0.22538(10) 0.14774(5) 0.0510(6) Uani 1 1 d . . . 
S2 S 0.99520(14) 0.26825(10) 0.08331(5) 0.0446(6) Uani 1 1 d . . . 
C1 C 0.9945(6) 0.0584(4) 0.1315(2) 0.054(3) Uani 1 1 d . . . 
C2 C 1.0020(7) 0.0289(5) 0.0998(2) 0.067(3) Uani 1 1 d . . . 
H2A H 0.9395 0.0436 0.0875 0.100 Uiso 1 1 calc R . . 
H2B H 1.0014 -0.0196 0.1013 0.100 Uiso 1 1 calc R . . 
H2C H 1.0701 0.0434 0.0900 0.100 Uiso 1 1 calc R . . 
C3 C 1.0891(7) 0.0379(5) 0.1523(2) 0.066(3) Uani 1 1 d . . . 
H3A H 1.0800 0.0584 0.1725 0.099 Uiso 1 1 calc R . . 
H3B H 1.1584 0.0525 0.1432 0.099 Uiso 1 1 calc R . . 
H3C H 1.0897 -0.0105 0.1545 0.099 Uiso 1 1 calc R . . 
C4 C 0.8833(6) 0.0400(4) 0.1460(2) 0.063(3) Uani 1 1 d . . . 
H4A H 0.8785 0.0593 0.1666 0.095 Uiso 1 1 calc R . . 
H4B H 0.8769 -0.0083 0.1474 0.095 Uiso 1 1 calc R . . 
H4C H 0.8239 0.0575 0.1332 0.095 Uiso 1 1 calc R . . 
C5 C 0.6567(6) 0.1337(4) 0.0707(2) 0.055(3) Uani 1 1 d . . . 
C6 C 0.6018(6) 0.1377(5) 0.1013(2) 0.061(3) Uani 1 1 d . . . 
H6A H 0.5773 0.1833 0.1050 0.091 Uiso 1 1 calc R . . 
H6B H 0.6536 0.1247 0.1174 0.091 Uiso 1 1 calc R . . 
H6C H 0.5387 0.1078 0.1017 0.091 Uiso 1 1 calc R . . 
C7 C 0.5806(6) 0.1579(5) 0.0448(2) 0.062(3) Uani 1 1 d . . . 
H7A H 0.6188 0.1546 0.0251 0.092 Uiso 1 1 calc R . . 
H7B H 0.5599 0.2041 0.0486 0.092 Uiso 1 1 calc R . . 
H7C H 0.5147 0.1302 0.0443 0.092 Uiso 1 1 calc R . . 
C8 C 0.6970(6) 0.0652(4) 0.0633(2) 0.060(3) Uani 1 1 d . . . 
H8A H 0.7321 0.0654 0.0431 0.090 Uiso 1 1 calc R . . 
H8B H 0.6351 0.0343 0.0632 0.090 Uiso 1 1 calc R . . 
H8C H 0.7500 0.0512 0.0789 0.090 Uiso 1 1 calc R . . 
C11 C 0.8356(6) 0.3032(4) 0.1558(2) 0.045(2) Uani 1 1 d . . . 
C12 C 0.9165(6) 0.3082(4) 0.1785(2) 0.049(2) Uani 1 1 d . . . 
C13 C 0.9653(6) 0.3698(4) 0.1844(2) 0.049(2) Uani 1 1 d . . . 
H13A H 1.0199 0.3730 0.1998 0.059 Uiso 1 1 calc R . . 
C14 C 0.9356(6) 0.4260(4) 0.1682(2) 0.047(2) Uani 1 1 d . . . 
C15 C 0.8570(6) 0.4206(4) 0.1453(2) 0.049(2) Uani 1 1 d . . . 
H15A H 0.8375 0.4586 0.1337 0.059 Uiso 1 1 calc R . . 
C16 C 0.8061(6) 0.3597(4) 0.1392(2) 0.046(2) Uani 1 1 d . . . 
C21 C 1.1010(6) 0.2146(4) 0.0696(2) 0.041(2) Uani 1 1 d . . . 
C22 C 1.0848(6) 0.1711(4) 0.0445(2) 0.044(2) Uani 1 1 d . . . 
C23 C 1.1594(6) 0.1202(4) 0.03902(19) 0.045(2) Uani 1 1 d . . . 
H23A H 1.1479 0.0916 0.0220 0.054 Uiso 1 1 calc R . . 
C24 C 1.2517(6) 0.1098(4) 0.0580(2) 0.045(2) Uani 1 1 d . . . 
C25 C 1.2718(6) 0.1580(4) 0.08001(18) 0.042(2) Uani 1 1 d . . . 
H25A H 1.3373 0.1549 0.0916 0.051 Uiso 1 1 calc R . . 
C26 C 1.2017(6) 0.2101(4) 0.0859(2) 0.045(2) Uani 1 1 d . . . 
C121 C 0.9567(8) 0.2499(4) 0.1966(2) 0.056(2) Uani 1 1 d . . . 
C122 C 0.8887(9) 0.2057(5) 0.2130(2) 0.076(3) Uani 1 1 d . . . 
H12A H 0.8115 0.2101 0.2121 0.092 Uiso 1 1 calc R . . 
C123 C 0.9357(12) 0.1558(5) 0.2303(3) 0.086(3) Uani 1 1 d . . . 
H12B H 0.8899 0.1272 0.2419 0.103 Uiso 1 1 calc R . . 
C124 C 1.0455(15) 0.1468(7) 0.2311(3) 0.107(5) Uani 1 1 d . . . 
H12C H 1.0757 0.1103 0.2420 0.129 Uiso 1 1 calc R . . 
C125 C 1.1130(10) 0.1907(7) 0.2162(3) 0.095(4) Uani 1 1 d . . . 
H12D H 1.1901 0.1863 0.2181 0.114 Uiso 1 1 calc R . . 
C126 C 1.0699(8) 0.2412(5) 0.1985(2) 0.066(3) Uani 1 1 d . . . 
H12E H 1.1173 0.2701 0.1875 0.079 Uiso 1 1 calc R . . 
C141 C 0.9848(6) 0.4918(4) 0.1758(2) 0.046(2) Uani 1 1 d . . . 
C142 C 1.0955(7) 0.4963(5) 0.1841(2) 0.065(3) Uani 1 1 d . . . 
H14A H 1.1396 0.4576 0.1851 0.078 Uiso 1 1 calc R . . 
C143 C 1.1403(8) 0.5586(5) 0.1908(2) 0.070(3) Uani 1 1 d . . . 
H14B H 1.2156 0.5617 0.1960 0.084 Uiso 1 1 calc R . . 
C144 C 1.0774(9) 0.6158(5) 0.1902(2) 0.071(3) Uani 1 1 d . . . 
H14C H 1.1091 0.6574 0.1951 0.085 Uiso 1 1 calc R . . 
C145 C 0.9681(8) 0.6118(4) 0.1822(2) 0.061(3) Uani 1 1 d . . . 
H14D H 0.9235 0.6503 0.1816 0.073 Uiso 1 1 calc R . . 
C146 C 0.9249(7) 0.5494(5) 0.1751(2) 0.066(3) Uani 1 1 d . . . 
H14E H 0.8500 0.5467 0.1694 0.079 Uiso 1 1 calc R . . 
C161 C 0.7249(6) 0.3577(4) 0.1132(2) 0.046(2) Uani 1 1 d . . . 
C162 C 0.6179(7) 0.3394(4) 0.1175(2) 0.054(2) Uani 1 1 d . . . 
H16A H 0.5929 0.3289 0.1375 0.064 Uiso 1 1 calc R . . 
C163 C 0.5460(7) 0.3359(4) 0.0932(3) 0.062(3) Uani 1 1 d . . . 
H16B H 0.4720 0.3237 0.0965 0.075 Uiso 1 1 calc R . . 
C164 C 0.5821(9) 0.3504(5) 0.0638(3) 0.072(3) Uani 1 1 d . . . 
H16C H 0.5336 0.3467 0.0469 0.086 Uiso 1 1 calc R . . 
C165 C 0.6898(8) 0.3703(5) 0.0593(2) 0.069(3) Uani 1 1 d . . . 
H16D H 0.7146 0.3816 0.0393 0.082 Uiso 1 1 calc R . . 
C166 C 0.7606(7) 0.3736(4) 0.0839(2) 0.058(2) Uani 1 1 d . . . 
H16E H 0.8343 0.3868 0.0807 0.070 Uiso 1 1 calc R . . 
C221 C 0.9901(6) 0.1755(4) 0.02387(19) 0.042(2) Uani 1 1 d . . . 
C222 C 0.9542(7) 0.2363(5) 0.0112(2) 0.060(3) Uani 1 1 d . . . 
H22A H 0.9910 0.2760 0.0166 0.072 Uiso 1 1 calc R . . 
C223 C 0.8665(7) 0.2396(6) -0.0091(2) 0.072(3) Uani 1 1 d . . . 
H22B H 0.8429 0.2812 -0.0168 0.087 Uiso 1 1 calc R . . 
C224 C 0.8131(7) 0.1812(6) -0.0180(2) 0.069(3) Uani 1 1 d . . . 
H22C H 0.7522 0.1834 -0.0315 0.083 Uiso 1 1 calc R . . 
C225 C 0.8485(7) 0.1209(6) -0.0074(2) 0.066(3) Uani 1 1 d . . . 
H22D H 0.8150 0.0810 -0.0141 0.079 Uiso 1 1 calc R . . 
C226 C 0.9353(6) 0.1191(4) 0.0138(2) 0.053(2) Uani 1 1 d . . . 
H22E H 0.9577 0.0773 0.0216 0.063 Uiso 1 1 calc R . . 
C241 C 1.3212(6) 0.0520(4) 0.0546(2) 0.042(2) Uani 1 1 d . . . 
C242 C 1.3452(6) 0.0244(4) 0.0256(2) 0.058(3) Uani 1 1 d . . . 
H24A H 1.3183 0.0454 0.0076 0.070 Uiso 1 1 calc R . . 
C243 C 1.4092(7) -0.0344(4) 0.0229(3) 0.057(2) Uani 1 1 d . . . 
H24B H 1.4232 -0.0529 0.0033 0.069 Uiso 1 1 calc R . . 
C244 C 1.4501(7) -0.0640(5) 0.0485(3) 0.065(3) Uani 1 1 d . . . 
H24C H 1.4947 -0.1023 0.0465 0.078 Uiso 1 1 calc R . . 
C245 C 1.4271(6) -0.0384(4) 0.0779(3) 0.059(3) Uani 1 1 d . . . 
H24D H 1.4532 -0.0602 0.0958 0.070 Uiso 1 1 calc R . . 
C246 C 1.3655(6) 0.0195(4) 0.0803(2) 0.051(2) Uani 1 1 d . . . 
H24E H 1.3529 0.0377 0.1000 0.061 Uiso 1 1 calc R . . 
C261 C 1.2345(6) 0.2573(4) 0.1107(2) 0.044(2) Uani 1 1 d . . . 
C262 C 1.2844(6) 0.2352(4) 0.1374(2) 0.055(2) Uani 1 1 d . . . 
H26A H 1.2910 0.1890 0.1413 0.066 Uiso 1 1 calc R . . 
C263 C 1.3249(7) 0.2810(5) 0.1585(2) 0.060(3) Uani 1 1 d . . . 
H26B H 1.3609 0.2653 0.1764 0.072 Uiso 1 1 calc R . . 
C264 C 1.3143(7) 0.3481(5) 0.1543(2) 0.063(3) Uani 1 1 d . . . 
H26C H 1.3414 0.3784 0.1691 0.076 Uiso 1 1 calc R . . 
C265 C 1.2636(6) 0.3705(4) 0.1280(2) 0.055(2) Uani 1 1 d . . . 
H26D H 1.2556 0.4169 0.1250 0.066 Uiso 1 1 calc R . . 
C266 C 1.2238(6) 0.3273(4) 0.1059(2) 0.049(2) Uani 1 1 d . . . 
H26E H 1.1900 0.3438 0.0879 0.059 Uiso 1 1 calc R . . 
C1S C 0.4496 0.4177 0.2309 0.040 Uiso 0.00 1 d P . . 
C2S C 0.5432 0.4353 0.2193 0.040 Uiso 0.00 1 d P . . 
H2SA H 0.5586 0.4814 0.2182 0.040 Uiso 0.00 1 d P . . 
C3S C 0.6230 0.3917 0.2082 0.040 Uiso 0.00 1 d P . . 
H3SA H 0.6899 0.4045 0.1988 0.040 Uiso 0.00 1 d P . . 
C4S C 0.5860 0.3208 0.2135 0.040 Uiso 0.00 1 d P . . 
H4SA H 0.6264 0.2821 0.2085 0.040 Uiso 0.00 1 d P . . 
C5S C 0.4666 0.3225 0.2290 0.040 Uiso 0.00 1 d P . . 
H5SA H 0.4496 0.2798 0.2368 0.040 Uiso 0.00 1 d P . . 
C6S C 0.4078 0.3514 0.2330 0.040 Uiso 0.00 1 d P . . 
H6SA H 0.3346 0.3391 0.2375 0.040 Uiso 0.00 1 d P . . 
C7S C 0.3569 0.4535 0.2423 0.040 Uiso 0.00 1 d P . . 
H7SA H 0.3281 0.4824 0.2262 0.040 Uiso 0.00 1 d P . . 
H7SB H 0.3790 0.4803 0.2600 0.040 Uiso 0.00 1 d P . . 
H7SC H 0.3000 0.4220 0.2487 0.040 Uiso 0.00 1 d P . . 
 
loop_ 
 _atom_site_aniso_label 
 _atom_site_aniso_U_11 
 _atom_site_aniso_U_22 
 _atom_site_aniso_U_33 
 _atom_site_aniso_U_23 
 _atom_site_aniso_U_13 
 _atom_site_aniso_U_12 
Fe1 0.0451(7) 0.0365(8) 0.0559(9) -0.0014(6) 0.0007(6) -0.0028(5) 
N1 0.043(4) 0.037(4) 0.069(5) 0.008(4) -0.002(3) 0.003(3) 
N2 0.040(4) 0.051(5) 0.050(6) 0.002(4) 0.008(3) -0.007(4) 
S1 0.0565(13) 0.0377(13) 0.0587(16) -0.0047(12) 0.0060(11) -0.0060(10) 
S2 0.0385(12) 0.0294(12) 0.0659(16) 0.0002(11) 0.0020(10) -0.0005(9) 
C1 0.046(5) 0.035(5) 0.082(8) 0.005(5) 0.002(5) -0.005(4) 
C2 0.083(6) 0.052(6) 0.066(8) -0.009(5) 0.020(5) 0.007(5) 
C3 0.066(6) 0.055(6) 0.076(7) 0.004(5) -0.004(5) 0.022(5) 
C4 0.073(6) 0.047(6) 0.069(7) 0.010(5) 0.004(5) -0.009(4) 
C5 0.051(5) 0.053(6) 0.060(7) -0.017(5) 0.006(5) -0.012(4) 
C6 0.055(5) 0.071(7) 0.056(7) -0.005(5) 0.005(5) -0.018(4) 
C7 0.049(5) 0.059(6) 0.076(7) -0.001(5) -0.023(5) 0.001(4) 
C8 0.048(5) 0.052(6) 0.080(7) -0.004(5) -0.002(5) -0.004(4) 
C11 0.052(5) 0.029(5) 0.055(6) -0.007(4) 0.001(5) -0.001(4) 
C12 0.056(5) 0.040(6) 0.050(6) -0.014(5) -0.002(5) 0.000(4) 
C13 0.053(5) 0.052(6) 0.042(6) -0.005(5) -0.008(4) 0.001(4) 
C14 0.037(5) 0.039(5) 0.066(7) -0.001(5) -0.003(4) -0.008(4) 
C15 0.051(5) 0.039(6) 0.058(6) 0.007(5) 0.000(5) 0.001(4) 
C16 0.044(5) 0.034(5) 0.061(6) -0.001(5) 0.014(4) -0.005(4) 
C21 0.034(5) 0.036(5) 0.053(6) 0.012(4) 0.006(4) 0.000(3) 
C22 0.040(5) 0.041(5) 0.050(6) -0.002(5) 0.008(4) 0.002(4) 
C23 0.052(5) 0.041(5) 0.041(6) 0.009(4) 0.011(4) -0.001(4) 
C24 0.045(5) 0.028(5) 0.063(6) 0.006(5) 0.006(5) -0.002(4) 
C25 0.042(5) 0.042(5) 0.042(5) -0.003(5) -0.007(4) 0.001(4) 
C26 0.051(5) 0.027(5) 0.057(6) 0.001(4) 0.010(5) -0.001(4) 
C121 0.089(7) 0.040(6) 0.038(6) -0.015(5) -0.007(5) 0.005(5) 
C122 0.109(8) 0.061(7) 0.059(7) 0.002(6) -0.013(6) -0.006(6) 
C123 0.141(11) 0.046(7) 0.070(8) 0.014(6) -0.002(7) 0.004(7) 
C124 0.165(14) 0.068(9) 0.089(10) -0.019(8) -0.035(10) 0.057(10) 
C125 0.101(9) 0.073(9) 0.112(11) -0.018(8) -0.012(8) 0.034(8) 
C126 0.079(7) 0.051(6) 0.067(7) 0.005(5) -0.016(5) 0.017(5) 
C141 0.057(5) 0.037(5) 0.045(6) 0.005(4) -0.006(4) 0.002(4) 
C142 0.060(6) 0.058(7) 0.078(8) -0.019(6) -0.006(5) 0.003(5) 
C143 0.070(6) 0.076(8) 0.064(7) -0.030(6) 0.004(5) -0.017(6) 
C144 0.101(8) 0.042(6) 0.070(8) -0.006(5) 0.011(6) 0.003(6) 
C145 0.075(7) 0.036(6) 0.073(7) 0.003(5) -0.020(5) 0.001(5) 
C146 0.069(6) 0.061(7) 0.067(7) 0.007(6) -0.020(5) -0.008(5) 
C161 0.040(5) 0.038(5) 0.060(7) -0.009(5) -0.008(5) 0.004(4) 
C162 0.050(6) 0.050(6) 0.061(7) -0.013(5) -0.014(5) 0.002(4) 
C163 0.056(6) 0.048(6) 0.083(9) 0.007(6) 0.009(6) -0.005(4) 
C164 0.082(8) 0.052(6) 0.082(9) -0.019(6) -0.040(7) 0.018(5) 
C165 0.078(7) 0.064(7) 0.064(7) 0.005(5) -0.012(6) -0.005(5) 
C166 0.054(6) 0.065(7) 0.055(7) 0.007(5) -0.010(5) 0.003(4) 
C221 0.040(5) 0.047(6) 0.039(5) 0.000(4) 0.006(4) 0.004(4) 
C222 0.055(5) 0.065(7) 0.060(7) 0.010(5) 0.013(5) 0.002(5) 
C223 0.064(6) 0.081(8) 0.073(8) 0.016(6) -0.013(6) 0.021(6) 
C224 0.049(6) 0.095(9) 0.065(7) 0.006(7) -0.003(5) 0.007(6) 
C225 0.050(6) 0.083(8) 0.065(7) -0.006(6) -0.008(5) -0.008(5) 
C226 0.046(5) 0.058(6) 0.054(6) -0.012(5) 0.006(5) -0.007(4) 
C241 0.032(4) 0.038(5) 0.055(6) 0.002(5) -0.006(4) -0.004(4) 
C242 0.049(5) 0.040(6) 0.085(8) -0.001(5) -0.019(5) 0.000(4) 
C243 0.066(6) 0.039(6) 0.068(8) -0.005(5) 0.010(5) 0.003(5) 
C244 0.058(6) 0.041(6) 0.097(9) -0.015(7) 0.020(6) -0.014(5) 
C245 0.042(5) 0.037(6) 0.097(9) 0.019(6) -0.003(5) -0.011(4) 
C246 0.045(5) 0.037(5) 0.071(7) -0.004(5) 0.004(5) -0.007(4) 
C261 0.036(4) 0.041(5) 0.055(6) -0.004(5) -0.004(4) 0.002(4) 
C262 0.073(6) 0.024(5) 0.068(7) 0.000(5) -0.026(5) 0.001(4) 
C263 0.076(6) 0.057(7) 0.047(6) 0.006(5) -0.006(5) -0.006(5) 
C264 0.078(6) 0.052(7) 0.060(7) -0.010(5) -0.007(6) -0.018(5) 
C265 0.057(5) 0.038(5) 0.071(7) -0.001(5) -0.013(5) -0.004(4) 
C266 0.045(5) 0.044(6) 0.058(6) 0.003(5) 0.005(4) 0.000(4) 
 
_geom_special_details 
; 
 All esds (except the esd in the dihedral angle between two l.s. planes) 
 are estimated using the full covariance matrix.  The cell esds are taken 
 into account individually in the estimation of esds in distances, angles 
 and torsion angles; correlations between esds in cell parameters are only 
 used when they are defined by crystal symmetry.  An approximate (isotropic) 
 treatment of cell esds is used for estimating esds involving l.s. planes. 
; 
 
loop_ 
 _geom_bond_atom_site_label_1 
 _geom_bond_atom_site_label_2 
 _geom_bond_distance 
 _geom_bond_site_symmetry_2 
 _geom_bond_publ_flag 
Fe1 N2 2.111(8) . ? 
Fe1 N1 2.133(6) . ? 
Fe1 S1 2.317(3) . ? 
Fe1 S2 2.329(2) . ? 
N1 C1 1.510(10) . ? 
N2 C5 1.540(10) . ? 
S1 C11 1.788(8) . ? 
S2 C21 1.789(8) . ? 
C1 C2 1.506(13) . ? 
C1 C3 1.527(12) . ? 
C1 C4 1.545(11) . ? 
C5 C6 1.496(12) . ? 
C5 C8 1.503(11) . ? 
C5 C7 1.543(12) . ? 
C11 C16 1.398(11) . ? 
C11 C12 1.402(11) . ? 
C12 C13 1.403(11) . ? 
C12 C121 1.500(12) . ? 
C13 C14 1.383(11) . ? 
C14 C15 1.391(11) . ? 
C14 C141 1.494(11) . ? 
C15 C16 1.402(11) . ? 
C16 C161 1.507(11) . ? 
C21 C22 1.416(11) . ? 
C21 C26 1.427(11) . ? 
C22 C23 1.394(11) . ? 
C22 C221 1.471(11) . ? 
C23 C24 1.415(11) . ? 
C24 C25 1.388(11) . ? 
C24 C241 1.452(11) . ? 
C25 C26 1.381(10) . ? 
C26 C261 1.494(11) . ? 
C121 C126 1.397(12) . ? 
C121 C122 1.413(13) . ? 
C122 C123 1.383(14) . ? 
C123 C124 1.356(16) . ? 
C124 C125 1.374(17) . ? 
C125 C126 1.384(15) . ? 
C141 C146 1.373(12) . ? 
C141 C142 1.405(10) . ? 
C142 C143 1.402(12) . ? 
C143 C144 1.388(13) . ? 
C144 C145 1.383(12) . ? 
C145 C146 1.400(12) . ? 
C161 C162 1.372(10) . ? 
C161 C166 1.390(12) . ? 
C162 C163 1.381(13) . ? 
C163 C164 1.385(14) . ? 
C164 C165 1.392(13) . ? 
C165 C166 1.381(12) . ? 
C221 C226 1.391(11) . ? 
C221 C222 1.416(12) . ? 
C222 C223 1.391(12) . ? 
C223 C224 1.402(14) . ? 
C224 C225 1.374(13) . ? 
C225 C226 1.406(12) . ? 
C241 C246 1.407(11) . ? 
C241 C242 1.411(12) . ? 
C242 C243 1.427(12) . ? 
C243 C244 1.361(13) . ? 
C244 C245 1.412(13) . ? 
C245 C246 1.392(11) . ? 
C261 C262 1.390(11) . ? 
C261 C266 1.432(11) . ? 
C262 C263 1.395(12) . ? 
C263 C264 1.372(12) . ? 
C264 C265 1.377(12) . ? 
C265 C266 1.390(11) . ? 
C1S C2S 1.3006 . ? 
C1S C6S 1.4336 . ? 
C1S C7S 1.4350 . ? 
C1S C5S 1.9326 . ? 
C2S C3S 1.3999 . ? 
C3S C4S 1.5177 . ? 
C4S C5S 1.6106 . ? 
C5S C6S 0.9414 . ? 
 
loop_ 
 _geom_angle_atom_site_label_1 
 _geom_angle_atom_site_label_2 
 _geom_angle_atom_site_label_3 
 _geom_angle 
 _geom_angle_site_symmetry_1 
 _geom_angle_site_symmetry_3 
 _geom_angle_publ_flag 
N2 Fe1 N1 137.0(3) . . ? 
N2 Fe1 S1 102.4(2) . . ? 
N1 Fe1 S1 100.6(2) . . ? 
N2 Fe1 S2 102.2(2) . . ? 
N1 Fe1 S2 97.23(18) . . ? 
S1 Fe1 S2 119.42(9) . . ? 
C1 N1 Fe1 127.4(5) . . ? 
C5 N2 Fe1 129.0(6) . . ? 
C11 S1 Fe1 99.6(3) . . ? 
C21 S2 Fe1 101.6(2) . . ? 
C2 C1 N1 107.1(7) . . ? 
C2 C1 C3 113.0(7) . . ? 
N1 C1 C3 109.0(7) . . ? 
C2 C1 C4 109.6(7) . . ? 
N1 C1 C4 106.9(6) . . ? 
C3 C1 C4 111.0(8) . . ? 
C6 C5 C8 112.9(8) . . ? 
C6 C5 N2 107.6(7) . . ? 
C8 C5 N2 108.4(6) . . ? 
C6 C5 C7 111.5(7) . . ? 
C8 C5 C7 109.3(7) . . ? 
N2 C5 C7 107.0(7) . . ? 
C16 C11 C12 119.3(7) . . ? 
C16 C11 S1 120.1(6) . . ? 
C12 C11 S1 120.6(6) . . ? 
C11 C12 C13 119.5(8) . . ? 
C11 C12 C121 123.2(7) . . ? 
C13 C12 C121 117.3(8) . . ? 
C14 C13 C12 121.4(8) . . ? 
C13 C14 C15 118.9(7) . . ? 
C13 C14 C141 120.6(8) . . ? 
C15 C14 C141 120.4(8) . . ? 
C14 C15 C16 120.8(8) . . ? 
C11 C16 C15 120.0(8) . . ? 
C11 C16 C161 122.5(7) . . ? 
C15 C16 C161 117.3(8) . . ? 
C22 C21 C26 117.8(7) . . ? 
C22 C21 S2 122.2(6) . . ? 
C26 C21 S2 119.7(6) . . ? 
C23 C22 C21 119.9(7) . . ? 
C23 C22 C221 117.0(8) . . ? 
C21 C22 C221 123.0(7) . . ? 
C22 C23 C24 122.0(8) . . ? 
C25 C24 C23 116.3(7) . . ? 
C25 C24 C241 122.0(8) . . ? 
C23 C24 C241 121.7(8) . . ? 
C26 C25 C24 123.6(7) . . ? 
C25 C26 C21 119.4(8) . . ? 
C25 C26 C261 117.0(7) . . ? 
C21 C26 C261 123.5(7) . . ? 
C126 C121 C122 118.4(9) . . ? 
C126 C121 C12 117.0(8) . . ? 
C122 C121 C12 124.6(9) . . ? 
C123 C122 C121 119.4(10) . . ? 
C124 C123 C122 121.5(12) . . ? 
C123 C124 C125 119.7(12) . . ? 
C124 C125 C126 120.7(11) . . ? 
C125 C126 C121 120.1(10) . . ? 
C146 C141 C142 117.8(8) . . ? 
C146 C141 C14 122.1(7) . . ? 
C142 C141 C14 120.1(7) . . ? 
C143 C142 C141 119.2(9) . . ? 
C144 C143 C142 121.7(9) . . ? 
C145 C144 C143 119.5(9) . . ? 
C144 C145 C146 118.3(9) . . ? 
C141 C146 C145 123.6(8) . . ? 
C162 C161 C166 119.1(8) . . ? 
C162 C161 C16 122.3(8) . . ? 
C166 C161 C16 118.6(7) . . ? 
C161 C162 C163 121.1(9) . . ? 
C162 C163 C164 119.8(9) . . ? 
C163 C164 C165 119.6(9) . . ? 
C166 C165 C164 119.8(10) . . ? 
C165 C166 C161 120.6(8) . . ? 
C226 C221 C222 115.8(8) . . ? 
C226 C221 C22 121.6(8) . . ? 
C222 C221 C22 122.5(8) . . ? 
C223 C222 C221 122.0(9) . . ? 
C222 C223 C224 119.7(9) . . ? 
C225 C224 C223 120.2(9) . . ? 
C224 C225 C226 118.8(9) . . ? 
C221 C226 C225 123.4(9) . . ? 
C246 C241 C242 116.7(8) . . ? 
C246 C241 C24 121.3(8) . . ? 
C242 C241 C24 122.0(8) . . ? 
C241 C242 C243 121.1(9) . . ? 
C244 C243 C242 119.9(9) . . ? 
C243 C244 C245 120.8(9) . . ? 
C246 C245 C244 118.8(9) . . ? 
C245 C246 C241 122.7(9) . . ? 
C262 C261 C266 118.6(8) . . ? 
C262 C261 C26 121.2(7) . . ? 
C266 C261 C26 119.9(8) . . ? 
C261 C262 C263 119.7(8) . . ? 
C264 C263 C262 122.2(9) . . ? 
C263 C264 C265 118.5(8) . . ? 
C264 C265 C266 121.9(8) . . ? 
C265 C266 C261 119.1(8) . . ? 
C2S C1S C6S 126.4 . . ? 
C2S C1S C7S 133.9 . . ? 
C6S C1S C7S 99.5 . . ? 
C2S C1S C5S 99.3 . . ? 
C6S C1S C5S 27.7 . . ? 
C7S C1S C5S 126.8 . . ? 
C1S C2S C3S 125.1 . . ? 
C2S C3S C4S 109.4 . . ? 
C3S C4S C5S 108.3 . . ? 
C6S C5S C4S 141.5 . . ? 
C6S C5S C1S 45.2 . . ? 
C4S C5S C1S 97.8 . . ? 
C5S C6S C1S 107.1 . . ? 
 
loop_ 
 _geom_torsion_atom_site_label_1 
 _geom_torsion_atom_site_label_2 
 _geom_torsion_atom_site_label_3 
 _geom_torsion_atom_site_label_4 
 _geom_torsion 
 _geom_torsion_site_symmetry_1 
 _geom_torsion_site_symmetry_2 
 _geom_torsion_site_symmetry_3 
 _geom_torsion_site_symmetry_4 
 _geom_torsion_publ_flag 
N2 Fe1 N1 C1 -25.6(9) . . . . ? 
S1 Fe1 N1 C1 95.8(7) . . . . ? 
S2 Fe1 N1 C1 -142.3(7) . . . . ? 
N1 Fe1 N2 C5 60.4(8) . . . . ? 
S1 Fe1 N2 C5 -60.5(7) . . . . ? 
S2 Fe1 N2 C5 175.3(7) . . . . ? 
N2 Fe1 S1 C11 -121.8(4) . . . . ? 
N1 Fe1 S1 C11 94.8(3) . . . . ? 
S2 Fe1 S1 C11 -9.9(3) . . . . ? 
N2 Fe1 S2 C21 -99.1(4) . . . . ? 
N1 Fe1 S2 C21 42.4(4) . . . . ? 
S1 Fe1 S2 C21 148.9(3) . . . . ? 
Fe1 N1 C1 C2 64.9(8) . . . . ? 
Fe1 N1 C1 C3 -172.5(6) . . . . ? 
Fe1 N1 C1 C4 -52.4(10) . . . . ? 
Fe1 N2 C5 C6 45.5(10) . . . . ? 
Fe1 N2 C5 C8 -76.9(9) . . . . ? 
Fe1 N2 C5 C7 165.3(6) . . . . ? 
Fe1 S1 C11 C16 81.8(6) . . . . ? 
Fe1 S1 C11 C12 -97.2(7) . . . . ? 
C16 C11 C12 C13 0.9(12) . . . . ? 
S1 C11 C12 C13 179.9(6) . . . . ? 
C16 C11 C12 C121 -177.4(8) . . . . ? 
S1 C11 C12 C121 1.5(11) . . . . ? 
C11 C12 C13 C14 -0.2(12) . . . . ? 
C121 C12 C13 C14 178.2(8) . . . . ? 
C12 C13 C14 C15 -1.1(12) . . . . ? 
C12 C13 C14 C141 177.1(8) . . . . ? 
C13 C14 C15 C16 1.8(12) . . . . ? 
C141 C14 C15 C16 -176.5(7) . . . . ? 
C12 C11 C16 C15 -0.3(12) . . . . ? 
S1 C11 C16 C15 -179.2(6) . . . . ? 
C12 C11 C16 C161 176.3(7) . . . . ? 
S1 C11 C16 C161 -2.7(11) . . . . ? 
C14 C15 C16 C11 -1.1(12) . . . . ? 
C14 C15 C16 C161 -177.8(7) . . . . ? 
Fe1 S2 C21 C22 70.6(7) . . . . ? 
Fe1 S2 C21 C26 -103.0(6) . . . . ? 
C26 C21 C22 C23 8.3(11) . . . . ? 
S2 C21 C22 C23 -165.5(6) . . . . ? 
C26 C21 C22 C221 -173.3(7) . . . . ? 
S2 C21 C22 C221 13.0(11) . . . . ? 
C21 C22 C23 C24 0.6(12) . . . . ? 
C221 C22 C23 C24 -178.0(7) . . . . ? 
C22 C23 C24 C25 -8.0(11) . . . . ? 
C22 C23 C24 C241 172.0(7) . . . . ? 
C23 C24 C25 C26 6.6(12) . . . . ? 
C241 C24 C25 C26 -173.3(8) . . . . ? 
C24 C25 C26 C21 2.2(12) . . . . ? 
C24 C25 C26 C261 179.2(7) . . . . ? 
C22 C21 C26 C25 -9.6(11) . . . . ? 
S2 C21 C26 C25 164.3(6) . . . . ? 
C22 C21 C26 C261 173.5(7) . . . . ? 
S2 C21 C26 C261 -12.6(10) . . . . ? 
C11 C12 C121 C126 130.3(9) . . . . ? 
C13 C12 C121 C126 -48.1(11) . . . . ? 
C11 C12 C121 C122 -52.9(12) . . . . ? 
C13 C12 C121 C122 128.7(9) . . . . ? 
C126 C121 C122 C123 0.4(13) . . . . ? 
C12 C121 C122 C123 -176.4(9) . . . . ? 
C121 C122 C123 C124 -2.4(16) . . . . ? 
C122 C123 C124 C125 4.6(18) . . . . ? 
C123 C124 C125 C126 -4.7(19) . . . . ? 
C124 C125 C126 C121 2.8(17) . . . . ? 
C122 C121 C126 C125 -0.6(14) . . . . ? 
C12 C121 C126 C125 176.4(9) . . . . ? 
C13 C14 C141 C146 -141.9(9) . . . . ? 
C15 C14 C141 C146 36.3(13) . . . . ? 
C13 C14 C141 C142 37.9(12) . . . . ? 
C15 C14 C141 C142 -143.8(8) . . . . ? 
C146 C141 C142 C143 -0.7(13) . . . . ? 
C14 C141 C142 C143 179.4(9) . . . . ? 
C141 C142 C143 C144 1.3(15) . . . . ? 
C142 C143 C144 C145 -0.9(15) . . . . ? 
C143 C144 C145 C146 0.0(14) . . . . ? 
C142 C141 C146 C145 -0.2(14) . . . . ? 
C14 C141 C146 C145 179.6(9) . . . . ? 
C144 C145 C146 C141 0.6(15) . . . . ? 
C11 C16 C161 C162 62.3(11) . . . . ? 
C15 C16 C161 C162 -121.1(9) . . . . ? 
C11 C16 C161 C166 -116.2(9) . . . . ? 
C15 C16 C161 C166 60.4(10) . . . . ? 
C166 C161 C162 C163 0.5(13) . . . . ? 
C16 C161 C162 C163 -177.9(8) . . . . ? 
C161 C162 C163 C164 0.8(14) . . . . ? 
C162 C163 C164 C165 -2.0(14) . . . . ? 
C163 C164 C165 C166 1.9(14) . . . . ? 
C164 C165 C166 C161 -0.6(14) . . . . ? 
C162 C161 C166 C165 -0.7(13) . . . . ? 
C16 C161 C166 C165 177.9(8) . . . . ? 
C23 C22 C221 C226 40.2(11) . . . . ? 
C21 C22 C221 C226 -138.3(8) . . . . ? 
C23 C22 C221 C222 -134.8(8) . . . . ? 
C21 C22 C221 C222 46.7(11) . . . . ? 
C226 C221 C222 C223 2.7(12) . . . . ? 
C22 C221 C222 C223 178.0(8) . . . . ? 
C221 C222 C223 C224 -1.7(14) . . . . ? 
C222 C223 C224 C225 -1.4(14) . . . . ? 
C223 C224 C225 C226 3.2(14) . . . . ? 
C222 C221 C226 C225 -0.8(12) . . . . ? 
C22 C221 C226 C225 -176.2(8) . . . . ? 
C224 C225 C226 C221 -2.1(13) . . . . ? 
C25 C24 C241 C246 38.4(11) . . . . ? 
C23 C24 C241 C246 -141.5(8) . . . . ? 
C25 C24 C241 C242 -143.4(8) . . . . ? 
C23 C24 C241 C242 36.7(11) . . . . ? 
C246 C241 C242 C243 1.4(11) . . . . ? 
C24 C241 C242 C243 -176.8(7) . . . . ? 
C241 C242 C243 C244 -1.5(12) . . . . ? 
C242 C243 C244 C245 2.1(13) . . . . ? 
C243 C244 C245 C246 -2.7(12) . . . . ? 
C244 C245 C246 C241 2.8(11) . . . . ? 
C242 C241 C246 C245 -2.2(11) . . . . ? 
C24 C241 C246 C245 176.1(7) . . . . ? 
C25 C26 C261 C262 -38.5(11) . . . . ? 
C21 C26 C261 C262 138.4(8) . . . . ? 
C25 C26 C261 C266 135.7(8) . . . . ? 
C21 C26 C261 C266 -47.3(11) . . . . ? 
C266 C261 C262 C263 -1.4(12) . . . . ? 
C26 C261 C262 C263 172.9(7) . . . . ? 
C261 C262 C263 C264 2.0(14) . . . . ? 
C262 C263 C264 C265 -1.1(14) . . . . ? 
C263 C264 C265 C266 -0.4(13) . . . . ? 
C264 C265 C266 C261 0.9(12) . . . . ? 
C262 C261 C266 C265 0.0(11) . . . . ? 
C26 C261 C266 C265 -174.4(7) . . . . ? 
C6S C1S C2S C3S -3.8 . . . . ? 
C7S C1S C2S C3S -177.6 . . . . ? 
C5S C1S C2S C3S 2.6 . . . . ? 
C1S C2S C3S C4S -3.1 . . . . ? 
C2S C3S C4S C5S 1.7 . . . . ? 
C3S C4S C5S C6S 13.6 . . . . ? 
C3S C4S C5S C1S -0.4 . . . . ? 
C2S C1S C5S C6S -168.8 . . . . ? 
C7S C1S C5S C6S 11.3 . . . . ? 
C2S C1S C5S C4S -1.1 . . . . ? 
C6S C1S C5S C4S 167.7 . . . . ? 
C7S C1S C5S C4S 179.1 . . . . ? 
C4S C5S C6S C1S -19.7 . . . . ? 
C2S C1S C6S C5S 13.7 . . . . ? 
C7S C1S C6S C5S -170.8 . . . . ? 
 
loop_
  _platon_squeeze_void_nr             
  _platon_squeeze_void_average_x      
  _platon_squeeze_void_average_y      
  _platon_squeeze_void_average_z      
  _platon_squeeze_void_volume        
  _platon_squeeze_void_count_electrons
         1    -0.008     0.898     0.250     395.6      53.3
         2    -0.032     0.398     0.250     395.7      51.0
         3    -0.009     0.602     0.750     395.6      52.1
         4    -0.033     0.102     0.750     395.7      49.8
         5     0.167     0.937     0.069       7.1       0.3
         6     0.167     0.563     0.569       7.1       0.3
         7     0.333     0.438     0.069       7.1       0.3
         8     0.333     0.063     0.569       7.1       0.1
         9     0.667     0.937     0.431       7.1       0.5
        10     0.667     0.563     0.931       7.1       0.4
        11     0.833     0.438     0.431       7.1       0.2
        12     0.833     0.063     0.931       7.1       0.4
_platon_squeeze_details             
; 
Disordered Toluene removed.  Expected # electrons = 400
;

 
data_3 
 
_audit_creation_method            SHELXL-97 
_chemical_name_systematic 
; 
 ? 
; 
_chemical_name_common             'Homoleptic Dimer Aniline' 
_chemical_melting_point           ? 
_chemical_formula_moiety          
'(Fe 2+)2 (C9 H11 S 1-)4 (C6 H7 N)2 (C H2 Cl2)4' 
_chemical_formula_structural      
'Fe2(C9 H11 S)4(C6 H7 N)2(C H2 Cl2)4'
_chemical_formula_sum 
 'C108 H82 Cl0 Fe2 N2 S4' 
_chemical_formula_weight          1647.70 
_chemical_compound_source         'Chemical Synthesis, S.C. Lee Lab'

 
loop_ 
 _atom_type_symbol 
 _atom_type_description 
 _atom_type_scat_dispersion_real 
 _atom_type_scat_dispersion_imag 
 _atom_type_scat_source 
 'C'  'C'   0.0033   0.0016 
 'International Tables Vol C Tables 4.2.6.8 and 6.1.1.4' 
 'H'  'H'   0.0000   0.0000 
 'International Tables Vol C Tables 4.2.6.8 and 6.1.1.4' 
 'N'  'N'   0.0061   0.0033 
 'International Tables Vol C Tables 4.2.6.8 and 6.1.1.4' 
 'Fe'  'Fe'   0.3463   0.8444 
 'International Tables Vol C Tables 4.2.6.8 and 6.1.1.4' 
 'S'  'S'   0.1246   0.1234 
 'International Tables Vol C Tables 4.2.6.8 and 6.1.1.4' 
 'Cl'  'Cl'   0.1484   0.1585 
 'International Tables Vol C Tables 4.2.6.8 and 6.1.1.4' 
 
_symmetry_cell_setting            'Triclinic' 
_symmetry_space_group_name_H-M    'P -1'
 
loop_ 
 _symmetry_equiv_pos_as_xyz 
 'x, y, z' 
 '-x, -y, -z' 
 
_cell_length_a                    12.276(3) 
_cell_length_b                    12.791(3) 
_cell_length_c                    18.173(4) 
_cell_angle_alpha                 88.04(3) 
_cell_angle_beta                  74.45(3) 
_cell_angle_gamma                 63.27(3) 
_cell_volume                      2442.9(9) 
_cell_formula_units_Z             1 
_cell_measurement_temperature     200(2) 
_cell_measurement_reflns_used     6263 
_cell_measurement_theta_min       1.17 
_cell_measurement_theta_max       22.44 
 
_exptl_crystal_description        'plate' 
_exptl_crystal_colour             'yellow' 
_exptl_crystal_size_max           0.33 
_exptl_crystal_size_mid           0.22 
_exptl_crystal_size_min           0.04 
_exptl_crystal_density_meas       ? 
_exptl_crystal_density_diffrn     1.120 
_exptl_crystal_density_method     'not measured' 
_exptl_crystal_F_000              860 
_exptl_absorpt_coefficient_mu     0.427 
_exptl_absorpt_correction_type    'none' 
_exptl_absorpt_correction_T_min   ? 
_exptl_absorpt_correction_T_max   ? 
_exptl_absorpt_process_details    ? 
 
_exptl_special_details 
; 
 ? 
; 
 
_diffrn_ambient_temperature       200(2) 
_diffrn_radiation_wavelength      0.71073 
_diffrn_radiation_type            MoK\a 
_diffrn_radiation_source          'fine-focus sealed tube' 
_diffrn_radiation_monochromator   graphite 
_diffrn_measurement_device_type   ? 
_diffrn_measurement_method        ? 
_diffrn_detector_area_resol_mean  ? 
_diffrn_standards_number          0 
_diffrn_standards_interval_count  ? 
_diffrn_standards_interval_time   ? 
_diffrn_standards_decay_%         ? 
_diffrn_reflns_number             6263 
_diffrn_reflns_av_R_equivalents   0.0000 
_diffrn_reflns_av_sigmaI/netI     0.0982 
_diffrn_reflns_limit_h_min        0 
_diffrn_reflns_limit_h_max        13 
_diffrn_reflns_limit_k_min        -11 
_diffrn_reflns_limit_k_max        13 
_diffrn_reflns_limit_l_min        -18 
_diffrn_reflns_limit_l_max        19 
_diffrn_reflns_theta_min          1.17 
_diffrn_reflns_theta_max          22.44
_diffrn_measured_fraction_theta_max    0.986 
_diffrn_reflns_theta_full              22.44 
_diffrn_measured_fraction_theta_full   0.986 
_refine_diff_density_max    0.703 
_refine_diff_density_min   -0.318 
_refine_diff_density_rms    0.081 
_reflns_number_total              6263 
_reflns_number_gt                 4732 
_reflns_threshold_expression      >2sigma(I) 
 
_computing_data_collection        'NONIUS COLLECT'
_computing_cell_refinement        'DENZO-SMN'
_computing_data_reduction         'DENZO-SMN, Platon, Siemens SHELXTL'
_computing_structure_solution     'Siemens SHELXTL'
_computing_structure_refinement   'Siemens SHELXTL'
_computing_molecular_graphics     'Siemens SHELXTL'
_computing_publication_material   'CIFTAB, Siemens SHELXTL'
 
_refine_special_details 
; 
 Refinement of F^2^ against ALL reflections.  The weighted R-factor wR and 
 goodness of fit S are based on F^2^, conventional R-factors R are based 
 on F, with F set to zero for negative F^2^. The threshold expression of 
 F^2^ > 2sigma(F^2^) is used only for calculating R-factors(gt) etc. and is 
 not relevant to the choice of reflections for refinement.  R-factors based 
 on F^2^ are statistically about twice as large as those based on F, and R- 
 factors based on ALL data will be even larger. 
; 
 
_refine_ls_structure_factor_coef  Fsqd  
_refine_ls_matrix_type            full 
_refine_ls_weighting_scheme       calc  
_refine_ls_weighting_details 
 'calc w=1/[\s^2^(Fo^2^)+(0.0814P)^2^+2.3423P] where P=(Fo^2^+2Fc^2^)/3' 
_atom_sites_solution_primary      direct 
_atom_sites_solution_secondary    difmap 
_atom_sites_solution_hydrogens    geom 
_refine_ls_hydrogen_treatment     constr 
_refine_ls_extinction_method      none 
_refine_ls_extinction_coef        ? 
_refine_ls_number_reflns          6263 
_refine_ls_number_parameters      569 
_refine_ls_number_restraints      0 
_refine_ls_R_factor_all           0.1013 
_refine_ls_R_factor_gt            0.0731 
_refine_ls_wR_factor_ref          0.1768 
_refine_ls_wR_factor_gt           0.1672 
_refine_ls_goodness_of_fit_ref    1.072 
_refine_ls_restrained_S_all       1.072 
_refine_ls_shift/su_max           0.000 
_refine_ls_shift/su_mean          0.000 
 
loop_ 
 _atom_site_label 
 _atom_site_type_symbol 
 _atom_site_fract_x 
 _atom_site_fract_y 
 _atom_site_fract_z 
 _atom_site_U_iso_or_equiv 
 _atom_site_adp_type 
 _atom_site_occupancy 
 _atom_site_symmetry_multiplicity 
 _atom_site_calc_flag 
 _atom_site_refinement_flags 
 _atom_site_disorder_assembly 
 _atom_site_disorder_group 
Fe1 Fe 0.13141(7) 0.88632(6) 0.42558(4) 0.0316(3) Uani 1 1 d . . . 
S1 S 0.25035(13) 0.92534(12) 0.31862(7) 0.0402(4) Uani 1 1 d . . . 
S2 S -0.07120(12) 1.04883(11) 0.44220(7) 0.0331(4) Uani 1 1 d . . . 
N1 N 0.1260(4) 0.7249(4) 0.4449(3) 0.0443(12) Uani 1 1 d . . . 
H1A H 0.1590 0.6967 0.4854 0.053 Uiso 1 1 calc R . . 
H1B H 0.0419 0.7409 0.4607 0.053 Uiso 1 1 calc R . . 
C1 C 0.1910(5) 0.6292(5) 0.3827(3) 0.0398(14) Uani 1 1 d . . . 
C2 C 0.1762(6) 0.6561(5) 0.3122(3) 0.0551(17) Uani 1 1 d . . . 
H2A H 0.1260 0.7350 0.3036 0.066 Uiso 1 1 calc R . . 
C3 C 0.2364(7) 0.5652(7) 0.2517(4) 0.069(2) Uani 1 1 d . . . 
H3A H 0.2247 0.5819 0.2023 0.083 Uiso 1 1 calc R . . 
C4 C 0.3124(7) 0.4520(7) 0.2645(4) 0.074(2) Uani 1 1 d . . . 
H4A H 0.3548 0.3909 0.2235 0.088 Uiso 1 1 calc R . . 
C5 C 0.3265(7) 0.4278(6) 0.3351(5) 0.076(2) Uani 1 1 d . . . 
H5A H 0.3786 0.3495 0.3436 0.091 Uiso 1 1 calc R . . 
C6 C 0.2657(6) 0.5162(5) 0.3955(4) 0.0536(16) Uani 1 1 d . . . 
H6A H 0.2757 0.4986 0.4452 0.064 Uiso 1 1 calc R . . 
C11 C 0.3695(5) 0.7891(5) 0.2664(3) 0.0353(13) Uani 1 1 d . . . 
C12 C 0.3770(5) 0.7688(4) 0.1887(3) 0.0383(13) Uani 1 1 d . . . 
C13 C 0.4676(5) 0.6625(5) 0.1472(3) 0.0386(13) Uani 1 1 d . . . 
H13A H 0.4736 0.6513 0.0946 0.046 Uiso 1 1 calc R . . 
C14 C 0.5503(5) 0.5715(5) 0.1793(3) 0.0363(13) Uani 1 1 d . . . 
C15 C 0.5444(5) 0.5945(5) 0.2555(3) 0.0368(13) Uani 1 1 d . . . 
H15A H 0.6009 0.5347 0.2787 0.044 Uiso 1 1 calc R . . 
C16 C 0.4585(5) 0.7018(4) 0.2983(3) 0.0327(13) Uani 1 1 d . . . 
C21 C -0.1741(5) 1.0659(4) 0.3858(3) 0.0318(12) Uani 1 1 d . . . 
C22 C -0.2017(5) 1.1589(5) 0.3382(3) 0.0348(13) Uani 1 1 d . . . 
C23 C -0.2823(5) 1.1734(5) 0.2942(3) 0.0391(14) Uani 1 1 d . . . 
H23A H -0.3026 1.2378 0.2638 0.047 Uiso 1 1 calc R . . 
C24 C -0.3358(5) 1.0973(5) 0.2924(3) 0.0368(13) Uani 1 1 d . . . 
C25 C -0.3032(5) 1.0046(5) 0.3378(3) 0.0375(13) Uani 1 1 d . . . 
H25A H -0.3364 0.9506 0.3369 0.045 Uiso 1 1 calc R . . 
C26 C -0.2249(5) 0.9867(4) 0.3845(3) 0.0336(13) Uani 1 1 d . . . 
C121 C 0.2963(5) 0.8614(5) 0.1462(3) 0.0423(14) Uani 1 1 d . . . 
C122 C 0.3519(7) 0.9097(5) 0.0899(3) 0.0568(17) Uani 1 1 d . . . 
H12B H 0.4401 0.8864 0.0798 0.068 Uiso 1 1 calc R . . 
C123 C 0.2846(8) 0.9908(6) 0.0472(4) 0.073(2) Uani 1 1 d . . . 
H12E H 0.3256 1.0236 0.0086 0.088 Uiso 1 1 calc R . . 
C124 C 0.1575(8) 1.0241(6) 0.0608(4) 0.077(2) Uani 1 1 d . . . 
H12C H 0.1103 1.0799 0.0312 0.093 Uiso 1 1 calc R . . 
C125 C 0.0981(7) 0.9774(6) 0.1166(4) 0.073(2) Uani 1 1 d . . . 
H12A H 0.0103 0.9997 0.1256 0.088 Uiso 1 1 calc R . . 
C126 C 0.1684(7) 0.8964(6) 0.1605(4) 0.0608(18) Uani 1 1 d . . . 
H12D H 0.1274 0.8653 0.2004 0.073 Uiso 1 1 calc R . . 
C141 C 0.6474(5) 0.4589(5) 0.1335(3) 0.0379(13) Uani 1 1 d . . . 
C142 C 0.7655(5) 0.3946(5) 0.1482(3) 0.0436(14) Uani 1 1 d . . . 
H14A H 0.7834 0.4224 0.1890 0.052 Uiso 1 1 calc R . . 
C143 C 0.8557(6) 0.2914(5) 0.1036(3) 0.0523(16) Uani 1 1 d . . . 
H14C H 0.9349 0.2484 0.1145 0.063 Uiso 1 1 calc R . . 
C144 C 0.8330(6) 0.2499(5) 0.0439(3) 0.0557(17) Uani 1 1 d . . . 
H14E H 0.8967 0.1794 0.0131 0.067 Uiso 1 1 calc R . . 
C145 C 0.7173(6) 0.3105(5) 0.0284(3) 0.0516(16) Uani 1 1 d . . . 
H14B H 0.7008 0.2820 -0.0128 0.062 Uiso 1 1 calc R . . 
C146 C 0.6258(5) 0.4130(5) 0.0736(3) 0.0442(14) Uani 1 1 d . . . 
H14D H 0.5456 0.4533 0.0635 0.053 Uiso 1 1 calc R . . 
C161 C 0.4718(5) 0.7226(5) 0.3745(3) 0.0362(13) Uani 1 1 d . . . 
C162 C 0.5006(5) 0.8125(5) 0.3874(3) 0.0433(14) Uani 1 1 d . . . 
H16A H 0.5049 0.8635 0.3487 0.052 Uiso 1 1 calc R . . 
C163 C 0.5231(5) 0.8287(5) 0.4555(4) 0.0499(16) Uani 1 1 d . . . 
H16D H 0.5415 0.8913 0.4637 0.060 Uiso 1 1 calc R . . 
C164 C 0.5190(5) 0.7547(6) 0.5116(3) 0.0513(16) Uani 1 1 d . . . 
H16E H 0.5352 0.7655 0.5583 0.062 Uiso 1 1 calc R . . 
C165 C 0.4916(5) 0.6656(6) 0.4996(3) 0.0507(16) Uani 1 1 d . . . 
H16C H 0.4891 0.6142 0.5382 0.061 Uiso 1 1 calc R . . 
C166 C 0.4673(5) 0.6493(5) 0.4322(3) 0.0429(14) Uani 1 1 d . . . 
H16B H 0.4474 0.5874 0.4251 0.051 Uiso 1 1 calc R . . 
C221 C -0.1453(5) 1.2427(4) 0.3326(3) 0.0320(12) Uani 1 1 d . . . 
C222 C -0.0189(5) 1.2036(5) 0.2929(3) 0.0488(16) Uani 1 1 d . . . 
H22C H 0.0332 1.1232 0.2736 0.059 Uiso 1 1 calc R . . 
C223 C 0.0315(6) 1.2832(6) 0.2815(4) 0.0591(18) Uani 1 1 d . . . 
H22D H 0.1181 1.2563 0.2532 0.071 Uiso 1 1 calc R . . 
C224 C -0.0417(6) 1.4009(5) 0.3104(3) 0.0511(16) Uani 1 1 d . . . 
H22E H -0.0061 1.4542 0.3032 0.061 Uiso 1 1 calc R . . 
C225 C -0.1676(6) 1.4377(6) 0.3500(3) 0.0533(16) Uani 1 1 d . . . 
H22B H -0.2205 1.5180 0.3695 0.064 Uiso 1 1 calc R . . 
C226 C -0.2180(5) 1.3583(5) 0.3618(3) 0.0463(15) Uani 1 1 d . . . 
H22A H -0.3043 1.3847 0.3905 0.056 Uiso 1 1 calc R . . 
C241 C -0.4190(5) 1.1138(4) 0.2432(3) 0.0369(13) Uani 1 1 d . . . 
C242 C -0.3992(6) 1.1570(5) 0.1726(3) 0.0438(14) Uani 1 1 d . . . 
H24E H -0.3318 1.1776 0.1561 0.053 Uiso 1 1 calc R . . 
C243 C -0.4753(6) 1.1707(6) 0.1261(3) 0.0560(17) Uani 1 1 d . . . 
H24D H -0.4603 1.2008 0.0779 0.067 Uiso 1 1 calc R . . 
C244 C -0.5732(6) 1.1411(5) 0.1488(4) 0.0556(17) Uani 1 1 d . . . 
H24C H -0.6258 1.1513 0.1164 0.067 Uiso 1 1 calc R . . 
C245 C -0.5948(6) 1.0973(5) 0.2173(4) 0.0520(16) Uani 1 1 d . . . 
H24A H -0.6611 1.0750 0.2326 0.062 Uiso 1 1 calc R . . 
C246 C -0.5189(5) 1.0853(5) 0.2647(3) 0.0407(14) Uani 1 1 d . . . 
H24B H -0.5358 1.0568 0.3133 0.049 Uiso 1 1 calc R . . 
C261 C -0.1984(5) 0.8847(5) 0.4314(3) 0.0342(13) Uani 1 1 d . . . 
C262 C -0.2246(5) 0.8980(5) 0.5108(3) 0.0379(13) Uani 1 1 d . . . 
H26C H -0.2615 0.9746 0.5366 0.045 Uiso 1 1 calc R . . 
C263 C -0.1980(6) 0.8024(5) 0.5528(3) 0.0453(15) Uani 1 1 d . . . 
H26D H -0.2164 0.8139 0.6070 0.054 Uiso 1 1 calc R . . 
C264 C -0.1453(6) 0.6906(5) 0.5174(4) 0.0489(16) Uani 1 1 d . . . 
H26E H -0.1255 0.6248 0.5466 0.059 Uiso 1 1 calc R . . 
C265 C -0.1215(6) 0.6754(5) 0.4392(4) 0.0532(16) Uani 1 1 d . . . 
H26B H -0.0871 0.5985 0.4144 0.064 Uiso 1 1 calc R . . 
C266 C -0.1470(5) 0.7710(5) 0.3956(3) 0.0427(14) Uani 1 1 d . . . 
H26A H -0.1295 0.7590 0.3416 0.051 Uiso 1 1 calc R . . 
C1S C -0.2189 0.8248 0.1385 0.040 Uiso 0.00 1 d P . . 
H1SA H -0.2079 0.8103 0.0849 0.048 Uiso 0.00 1 d P . . 
H1SB H -0.2787 0.9058 0.1547 0.048 Uiso 0.00 1 d P . . 
Cl1S Cl -0.0772 0.7967 0.1527 0.040 Uiso 0.00 1 d P . . 
Cl2S Cl -0.2734 0.7394 0.1879 0.040 Uiso 0.00 1 d P . . 
C2S C 1.1665 0.4636 0.0294 0.040 Uiso 0.00 1 d P . . 
H2SA H 1.1895 0.4636 -0.0255 0.048 Uiso 0.00 1 d P . . 
H2SB H 1.1116 0.5434 0.0516 0.048 Uiso 0.00 1 d P . . 
Cl3S Cl 1.3040 0.4067 0.0607 0.040 Uiso 0.00 1 d P . . 
Cl4S Cl 1.0876 0.3807 0.0555 0.040 Uiso 0.00 1 d P . . 
 
loop_ 
 _atom_site_aniso_label 
 _atom_site_aniso_U_11 
 _atom_site_aniso_U_22 
 _atom_site_aniso_U_33 
 _atom_site_aniso_U_23 
 _atom_site_aniso_U_13 
 _atom_site_aniso_U_12 
Fe1 0.0298(4) 0.0250(4) 0.0338(4) -0.0058(3) -0.0079(3) -0.0072(4) 
S1 0.0379(8) 0.0302(8) 0.0376(7) -0.0067(6) 0.0001(6) -0.0083(7) 
S2 0.0302(7) 0.0296(8) 0.0345(7) -0.0051(6) -0.0114(6) -0.0078(6) 
N1 0.045(3) 0.032(3) 0.050(3) -0.012(2) -0.010(2) -0.013(2) 
C1 0.036(3) 0.035(4) 0.050(3) -0.005(3) -0.010(3) -0.017(3) 
C2 0.071(5) 0.039(4) 0.050(4) -0.004(3) -0.012(3) -0.024(4) 
C3 0.085(5) 0.080(6) 0.051(4) -0.012(4) -0.016(4) -0.046(5) 
C4 0.083(5) 0.048(5) 0.068(5) -0.026(4) 0.001(4) -0.021(4) 
C5 0.075(5) 0.031(4) 0.091(6) -0.015(4) -0.011(4) -0.003(4) 
C6 0.053(4) 0.031(4) 0.067(4) 0.000(3) -0.015(3) -0.011(3) 
C11 0.034(3) 0.032(3) 0.038(3) -0.004(3) -0.006(2) -0.014(3) 
C12 0.034(3) 0.024(3) 0.049(3) -0.008(3) -0.012(3) -0.006(3) 
C13 0.036(3) 0.039(3) 0.033(3) -0.007(3) -0.010(3) -0.010(3) 
C14 0.031(3) 0.032(3) 0.039(3) -0.005(3) -0.008(3) -0.008(3) 
C15 0.031(3) 0.029(3) 0.045(3) 0.003(3) -0.012(3) -0.008(3) 
C16 0.031(3) 0.025(3) 0.039(3) 0.000(2) -0.007(3) -0.011(3) 
C21 0.025(3) 0.030(3) 0.028(3) -0.004(2) -0.006(2) -0.003(3) 
C22 0.031(3) 0.031(3) 0.037(3) -0.005(3) -0.009(3) -0.009(3) 
C23 0.043(3) 0.034(3) 0.039(3) 0.010(3) -0.019(3) -0.013(3) 
C24 0.033(3) 0.033(3) 0.041(3) -0.004(3) -0.014(3) -0.010(3) 
C25 0.037(3) 0.032(3) 0.041(3) -0.004(3) -0.013(3) -0.012(3) 
C26 0.031(3) 0.027(3) 0.040(3) -0.003(2) -0.012(2) -0.009(3) 
C121 0.042(4) 0.033(3) 0.036(3) -0.014(3) -0.012(3) -0.002(3) 
C122 0.060(4) 0.055(4) 0.043(3) 0.010(3) -0.021(3) -0.012(4) 
C123 0.076(6) 0.057(5) 0.061(4) 0.007(4) -0.020(4) -0.008(4) 
C124 0.080(6) 0.054(5) 0.054(4) -0.014(4) -0.032(4) 0.015(4) 
C125 0.054(4) 0.057(5) 0.073(5) -0.014(4) -0.030(4) 0.013(4) 
C126 0.059(5) 0.049(4) 0.055(4) -0.003(3) -0.022(3) -0.004(4) 
C141 0.033(3) 0.028(3) 0.040(3) -0.009(2) -0.009(3) -0.003(3) 
C142 0.042(4) 0.033(3) 0.043(3) -0.008(3) -0.013(3) -0.005(3) 
C143 0.041(4) 0.037(4) 0.059(4) -0.005(3) -0.019(3) 0.003(3) 
C144 0.048(4) 0.036(4) 0.056(4) -0.019(3) -0.009(3) 0.002(3) 
C145 0.056(4) 0.039(4) 0.051(4) -0.009(3) -0.019(3) -0.011(4) 
C146 0.037(3) 0.032(3) 0.055(4) -0.007(3) -0.019(3) -0.005(3) 
C161 0.027(3) 0.032(3) 0.039(3) -0.007(3) -0.008(2) -0.004(3) 
C162 0.048(4) 0.038(4) 0.046(3) 0.000(3) -0.017(3) -0.019(3) 
C163 0.041(4) 0.044(4) 0.063(4) -0.008(3) -0.016(3) -0.016(3) 
C164 0.042(4) 0.064(4) 0.046(4) -0.007(3) -0.018(3) -0.019(4) 
C165 0.043(4) 0.065(4) 0.040(3) 0.012(3) -0.015(3) -0.019(3) 
C166 0.042(3) 0.040(3) 0.046(3) 0.004(3) -0.009(3) -0.020(3) 
C221 0.037(3) 0.025(3) 0.035(3) 0.002(2) -0.018(2) -0.011(3) 
C222 0.036(3) 0.042(4) 0.057(4) -0.001(3) -0.006(3) -0.012(3) 
C223 0.042(4) 0.062(5) 0.072(4) 0.009(4) -0.007(3) -0.028(4) 
C224 0.054(4) 0.043(4) 0.064(4) 0.004(3) -0.018(3) -0.028(4) 
C225 0.048(4) 0.041(4) 0.065(4) 0.000(3) -0.018(3) -0.014(3) 
C226 0.034(3) 0.040(4) 0.063(4) -0.003(3) -0.007(3) -0.019(3) 
C241 0.044(3) 0.026(3) 0.039(3) -0.006(2) -0.015(3) -0.011(3) 
C242 0.048(4) 0.044(4) 0.047(3) 0.000(3) -0.023(3) -0.022(3) 
C243 0.070(5) 0.063(5) 0.043(3) 0.008(3) -0.027(3) -0.031(4) 
C244 0.065(4) 0.051(4) 0.066(4) 0.008(3) -0.042(4) -0.027(4) 
C245 0.053(4) 0.050(4) 0.069(4) 0.015(3) -0.034(3) -0.028(3) 
C246 0.046(4) 0.032(3) 0.049(3) 0.008(3) -0.019(3) -0.020(3) 
C261 0.038(3) 0.031(3) 0.040(3) -0.003(3) -0.017(3) -0.018(3) 
C262 0.035(3) 0.032(3) 0.048(3) -0.006(3) -0.009(3) -0.018(3) 
C263 0.054(4) 0.044(4) 0.045(3) 0.014(3) -0.020(3) -0.027(3) 
C264 0.051(4) 0.038(4) 0.077(5) 0.028(3) -0.032(3) -0.030(3) 
C265 0.050(4) 0.032(4) 0.078(5) -0.007(3) -0.023(3) -0.015(3) 
C266 0.047(4) 0.034(3) 0.052(3) 0.004(3) -0.017(3) -0.021(3) 
 
_geom_special_details 
; 
 All esds (except the esd in the dihedral angle between two l.s. planes) 
 are estimated using the full covariance matrix.  The cell esds are taken 
 into account individually in the estimation of esds in distances, angles 
 and torsion angles; correlations between esds in cell parameters are only 
 used when they are defined by crystal symmetry.  An approximate (isotropic) 
 treatment of cell esds is used for estimating esds involving l.s. planes. 
; 
 
loop_ 
 _geom_bond_atom_site_label_1 
 _geom_bond_atom_site_label_2 
 _geom_bond_distance 
 _geom_bond_site_symmetry_2 
 _geom_bond_publ_flag 
Fe1 N1 2.110(4) . ? 
Fe1 S1 2.2862(16) . ? 
Fe1 S2 2.3638(19) . ? 
Fe1 S2 2.3751(16) 2_576 ? 
S1 C11 1.776(5) . ? 
S2 C21 1.767(5) . ? 
S2 Fe1 2.3751(16) 2_576 ? 
N1 C1 1.465(7) . ? 
C1 C2 1.354(8) . ? 
C1 C6 1.372(8) . ? 
C2 C3 1.408(9) . ? 
C3 C4 1.378(10) . ? 
C4 C5 1.347(10) . ? 
C5 C6 1.388(9) . ? 
C11 C16 1.406(7) . ? 
C11 C12 1.414(7) . ? 
C12 C13 1.383(7) . ? 
C12 C121 1.508(8) . ? 
C13 C14 1.391(8) . ? 
C14 C15 1.401(7) . ? 
C14 C141 1.482(7) . ? 
C15 C16 1.390(7) . ? 
C16 C161 1.483(7) . ? 
C21 C26 1.413(7) . ? 
C21 C22 1.414(7) . ? 
C22 C23 1.380(7) . ? 
C22 C221 1.503(7) . ? 
C23 C24 1.403(7) . ? 
C24 C25 1.390(7) . ? 
C24 C241 1.474(8) . ? 
C25 C26 1.387(7) . ? 
C26 C261 1.491(7) . ? 
C121 C122 1.363(8) . ? 
C121 C126 1.375(8) . ? 
C122 C123 1.370(9) . ? 
C123 C124 1.372(11) . ? 
C124 C125 1.368(10) . ? 
C125 C126 1.401(9) . ? 
C141 C146 1.392(7) . ? 
C141 C142 1.403(8) . ? 
C142 C143 1.380(8) . ? 
C143 C144 1.367(8) . ? 
C144 C145 1.380(8) . ? 
C145 C146 1.382(8) . ? 
C161 C166 1.388(7) . ? 
C161 C162 1.389(7) . ? 
C162 C163 1.381(8) . ? 
C163 C164 1.373(8) . ? 
C164 C165 1.364(8) . ? 
C165 C166 1.380(8) . ? 
C221 C226 1.370(7) . ? 
C221 C222 1.380(7) . ? 
C222 C223 1.396(8) . ? 
C223 C224 1.391(8) . ? 
C224 C225 1.379(8) . ? 
C225 C226 1.393(8) . ? 
C241 C242 1.383(7) . ? 
C241 C246 1.388(7) . ? 
C242 C243 1.373(8) . ? 
C243 C244 1.374(8) . ? 
C244 C245 1.358(8) . ? 
C245 C246 1.389(8) . ? 
C261 C262 1.390(7) . ? 
C261 C266 1.398(7) . ? 
C262 C263 1.377(7) . ? 
C263 C264 1.372(8) . ? 
C264 C265 1.376(8) . ? 
C265 C266 1.394(8) . ? 
C1S Cl2S 1.6483 . ? 
C1S Cl1S 1.7000 . ? 
C2S Cl4S 1.7124 . ? 
C2S Cl3S 1.7571 . ? 
 
loop_ 
 _geom_angle_atom_site_label_1 
 _geom_angle_atom_site_label_2 
 _geom_angle_atom_site_label_3 
 _geom_angle 
 _geom_angle_site_symmetry_1 
 _geom_angle_site_symmetry_3 
 _geom_angle_publ_flag 
N1 Fe1 S1 126.45(13) . . ? 
N1 Fe1 S2 113.75(14) . . ? 
S1 Fe1 S2 101.68(6) . . ? 
N1 Fe1 S2 94.92(13) . 2_576 ? 
S1 Fe1 S2 132.17(6) . 2_576 ? 
S2 Fe1 S2 77.80(7) . 2_576 ? 
C11 S1 Fe1 108.10(17) . . ? 
C21 S2 Fe1 124.59(17) . . ? 
C21 S2 Fe1 126.77(16) . 2_576 ? 
Fe1 S2 Fe1 102.20(7) . 2_576 ? 
C1 N1 Fe1 119.8(3) . . ? 
C2 C1 C6 121.2(5) . . ? 
C2 C1 N1 117.9(5) . . ? 
C6 C1 N1 120.9(5) . . ? 
C1 C2 C3 118.8(6) . . ? 
C4 C3 C2 119.8(7) . . ? 
C5 C4 C3 120.0(6) . . ? 
C4 C5 C6 120.7(7) . . ? 
C1 C6 C5 119.3(6) . . ? 
C16 C11 C12 118.7(5) . . ? 
C16 C11 S1 122.8(4) . . ? 
C12 C11 S1 118.5(4) . . ? 
C13 C12 C11 119.6(5) . . ? 
C13 C12 C121 117.3(5) . . ? 
C11 C12 C121 123.0(5) . . ? 
C12 C13 C14 122.7(5) . . ? 
C13 C14 C15 116.9(5) . . ? 
C13 C14 C141 121.7(5) . . ? 
C15 C14 C141 121.3(5) . . ? 
C16 C15 C14 122.3(5) . . ? 
C15 C16 C11 119.6(5) . . ? 
C15 C16 C161 117.8(5) . . ? 
C11 C16 C161 122.4(5) . . ? 
C26 C21 C22 119.3(5) . . ? 
C26 C21 S2 121.9(4) . . ? 
C22 C21 S2 118.8(4) . . ? 
C23 C22 C21 119.3(5) . . ? 
C23 C22 C221 118.0(5) . . ? 
C21 C22 C221 122.7(5) . . ? 
C22 C23 C24 122.8(5) . . ? 
C25 C24 C23 116.3(5) . . ? 
C25 C24 C241 122.3(5) . . ? 
C23 C24 C241 121.3(5) . . ? 
C26 C25 C24 123.6(5) . . ? 
C25 C26 C21 118.6(5) . . ? 
C25 C26 C261 118.5(5) . . ? 
C21 C26 C261 122.9(5) . . ? 
C122 C121 C126 118.4(6) . . ? 
C122 C121 C12 119.4(5) . . ? 
C126 C121 C12 122.2(5) . . ? 
C121 C122 C123 122.1(7) . . ? 
C122 C123 C124 119.4(7) . . ? 
C125 C124 C123 120.4(7) . . ? 
C124 C125 C126 119.1(7) . . ? 
C121 C126 C125 120.6(7) . . ? 
C146 C141 C142 117.2(5) . . ? 
C146 C141 C14 121.5(5) . . ? 
C142 C141 C14 121.3(5) . . ? 
C143 C142 C141 120.4(6) . . ? 
C144 C143 C142 121.1(6) . . ? 
C143 C144 C145 119.9(5) . . ? 
C144 C145 C146 119.3(6) . . ? 
C145 C146 C141 122.0(6) . . ? 
C166 C161 C162 117.8(5) . . ? 
C166 C161 C16 122.5(5) . . ? 
C162 C161 C16 119.4(5) . . ? 
C163 C162 C161 120.9(5) . . ? 
C164 C163 C162 120.3(6) . . ? 
C165 C164 C163 119.4(6) . . ? 
C164 C165 C166 120.9(6) . . ? 
C165 C166 C161 120.6(5) . . ? 
C226 C221 C222 119.3(5) . . ? 
C226 C221 C22 121.7(5) . . ? 
C222 C221 C22 118.9(5) . . ? 
C221 C222 C223 119.4(6) . . ? 
C224 C223 C222 121.7(6) . . ? 
C225 C224 C223 117.7(6) . . ? 
C224 C225 C226 120.6(6) . . ? 
C221 C226 C225 121.2(5) . . ? 
C242 C241 C246 117.1(5) . . ? 
C242 C241 C24 121.1(5) . . ? 
C246 C241 C24 121.8(5) . . ? 
C243 C242 C241 121.2(5) . . ? 
C242 C243 C244 120.4(6) . . ? 
C245 C244 C243 120.2(6) . . ? 
C244 C245 C246 119.3(6) . . ? 
C241 C246 C245 121.8(5) . . ? 
C262 C261 C266 117.8(5) . . ? 
C262 C261 C26 122.3(5) . . ? 
C266 C261 C26 119.9(5) . . ? 
C263 C262 C261 121.3(5) . . ? 
C264 C263 C262 120.9(5) . . ? 
C263 C264 C265 119.0(5) . . ? 
C264 C265 C266 121.0(6) . . ? 
C265 C266 C261 120.1(5) . . ? 
Cl2S C1S Cl1S 109.5 . . ? 
Cl4S C2S Cl3S 110.3 . . ? 
 
loop_ 
 _geom_torsion_atom_site_label_1 
 _geom_torsion_atom_site_label_2 
 _geom_torsion_atom_site_label_3 
 _geom_torsion_atom_site_label_4 
 _geom_torsion 
 _geom_torsion_site_symmetry_1 
 _geom_torsion_site_symmetry_2 
 _geom_torsion_site_symmetry_3 
 _geom_torsion_site_symmetry_4 
 _geom_torsion_publ_flag 
N1 Fe1 S1 C11 -16.0(3) . . . . ? 
S2 Fe1 S1 C11 -147.6(2) . . . . ? 
S2 Fe1 S1 C11 128.4(2) 2_576 . . . ? 
N1 Fe1 S2 C21 -63.2(2) . . . . ? 
S1 Fe1 S2 C21 75.7(2) . . . . ? 
S2 Fe1 S2 C21 -153.3(2) 2_576 . . . ? 
N1 Fe1 S2 Fe1 90.03(14) . . . 2_576 ? 
S1 Fe1 S2 Fe1 -131.05(6) . . . 2_576 ? 
S2 Fe1 S2 Fe1 0.0 2_576 . . 2_576 ? 
S1 Fe1 N1 C1 -7.8(5) . . . . ? 
S2 Fe1 N1 C1 119.1(4) . . . . ? 
S2 Fe1 N1 C1 -162.1(4) 2_576 . . . ? 
Fe1 N1 C1 C2 -44.8(6) . . . . ? 
Fe1 N1 C1 C6 134.3(5) . . . . ? 
C6 C1 C2 C3 1.7(9) . . . . ? 
N1 C1 C2 C3 -179.2(5) . . . . ? 
C1 C2 C3 C4 -2.2(10) . . . . ? 
C2 C3 C4 C5 1.6(11) . . . . ? 
C3 C4 C5 C6 -0.3(12) . . . . ? 
C2 C1 C6 C5 -0.4(9) . . . . ? 
N1 C1 C6 C5 -179.6(5) . . . . ? 
C4 C5 C6 C1 -0.3(11) . . . . ? 
Fe1 S1 C11 C16 -57.6(4) . . . . ? 
Fe1 S1 C11 C12 124.0(4) . . . . ? 
C16 C11 C12 C13 2.6(7) . . . . ? 
S1 C11 C12 C13 -178.9(4) . . . . ? 
C16 C11 C12 C121 -172.9(5) . . . . ? 
S1 C11 C12 C121 5.6(7) . . . . ? 
C11 C12 C13 C14 2.3(8) . . . . ? 
C121 C12 C13 C14 178.0(5) . . . . ? 
C12 C13 C14 C15 -4.3(8) . . . . ? 
C12 C13 C14 C141 -179.5(5) . . . . ? 
C13 C14 C15 C16 1.3(7) . . . . ? 
C141 C14 C15 C16 176.6(5) . . . . ? 
C14 C15 C16 C11 3.4(7) . . . . ? 
C14 C15 C16 C161 -171.9(4) . . . . ? 
C12 C11 C16 C15 -5.4(7) . . . . ? 
S1 C11 C16 C15 176.2(4) . . . . ? 
C12 C11 C16 C161 169.7(4) . . . . ? 
S1 C11 C16 C161 -8.7(7) . . . . ? 
Fe1 S2 C21 C26 63.0(4) . . . . ? 
Fe1 S2 C21 C26 -83.7(4) 2_576 . . . ? 
Fe1 S2 C21 C22 -114.3(4) . . . . ? 
Fe1 S2 C21 C22 99.0(4) 2_576 . . . ? 
C26 C21 C22 C23 3.0(7) . . . . ? 
S2 C21 C22 C23 -179.7(4) . . . . ? 
C26 C21 C22 C221 -176.3(4) . . . . ? 
S2 C21 C22 C221 1.0(7) . . . . ? 
C21 C22 C23 C24 -2.2(8) . . . . ? 
C221 C22 C23 C24 177.1(5) . . . . ? 
C22 C23 C24 C25 0.0(8) . . . . ? 
C22 C23 C24 C241 -178.4(5) . . . . ? 
C23 C24 C25 C26 1.4(8) . . . . ? 
C241 C24 C25 C26 179.8(5) . . . . ? 
C24 C25 C26 C21 -0.6(8) . . . . ? 
C24 C25 C26 C261 179.2(5) . . . . ? 
C22 C21 C26 C25 -1.6(7) . . . . ? 
S2 C21 C26 C25 -178.9(4) . . . . ? 
C22 C21 C26 C261 178.6(5) . . . . ? 
S2 C21 C26 C261 1.3(7) . . . . ? 
C13 C12 C121 C122 -65.9(7) . . . . ? 
C11 C12 C121 C122 109.7(6) . . . . ? 
C13 C12 C121 C126 111.8(6) . . . . ? 
C11 C12 C121 C126 -72.7(7) . . . . ? 
C126 C121 C122 C123 -0.3(9) . . . . ? 
C12 C121 C122 C123 177.4(6) . . . . ? 
C121 C122 C123 C124 -0.6(10) . . . . ? 
C122 C123 C124 C125 0.4(11) . . . . ? 
C123 C124 C125 C126 0.8(10) . . . . ? 
C122 C121 C126 C125 1.6(9) . . . . ? 
C12 C121 C126 C125 -176.1(6) . . . . ? 
C124 C125 C126 C121 -1.8(10) . . . . ? 
C13 C14 C141 C146 -32.4(8) . . . . ? 
C15 C14 C141 C146 152.6(5) . . . . ? 
C13 C14 C141 C142 147.0(5) . . . . ? 
C15 C14 C141 C142 -28.0(8) . . . . ? 
C146 C141 C142 C143 1.0(8) . . . . ? 
C14 C141 C142 C143 -178.4(5) . . . . ? 
C141 C142 C143 C144 0.6(9) . . . . ? 
C142 C143 C144 C145 -1.2(9) . . . . ? 
C143 C144 C145 C146 0.2(9) . . . . ? 
C144 C145 C146 C141 1.5(9) . . . . ? 
C142 C141 C146 C145 -2.0(8) . . . . ? 
C14 C141 C146 C145 177.3(5) . . . . ? 
C15 C16 C161 C166 -57.7(7) . . . . ? 
C11 C16 C161 C166 127.1(6) . . . . ? 
C15 C16 C161 C162 116.7(6) . . . . ? 
C11 C16 C161 C162 -58.5(7) . . . . ? 
C166 C161 C162 C163 -0.4(8) . . . . ? 
C16 C161 C162 C163 -175.1(5) . . . . ? 
C161 C162 C163 C164 0.9(9) . . . . ? 
C162 C163 C164 C165 -0.5(9) . . . . ? 
C163 C164 C165 C166 -0.3(9) . . . . ? 
C164 C165 C166 C161 0.8(9) . . . . ? 
C162 C161 C166 C165 -0.4(8) . . . . ? 
C16 C161 C166 C165 174.1(5) . . . . ? 
C23 C22 C221 C226 70.2(7) . . . . ? 
C21 C22 C221 C226 -110.5(6) . . . . ? 
C23 C22 C221 C222 -105.8(6) . . . . ? 
C21 C22 C221 C222 73.5(7) . . . . ? 
C226 C221 C222 C223 -1.7(9) . . . . ? 
C22 C221 C222 C223 174.4(5) . . . . ? 
C221 C222 C223 C224 1.3(10) . . . . ? 
C222 C223 C224 C225 -1.1(10) . . . . ? 
C223 C224 C225 C226 1.4(9) . . . . ? 
C222 C221 C226 C225 2.0(9) . . . . ? 
C22 C221 C226 C225 -174.0(5) . . . . ? 
C224 C225 C226 C221 -1.9(9) . . . . ? 
C25 C24 C241 C242 -144.5(5) . . . . ? 
C23 C24 C241 C242 33.8(8) . . . . ? 
C25 C24 C241 C246 34.5(8) . . . . ? 
C23 C24 C241 C246 -147.2(5) . . . . ? 
C246 C241 C242 C243 -0.1(8) . . . . ? 
C24 C241 C242 C243 178.9(5) . . . . ? 
C241 C242 C243 C244 -0.3(9) . . . . ? 
C242 C243 C244 C245 -0.4(10) . . . . ? 
C243 C244 C245 C246 1.5(9) . . . . ? 
C242 C241 C246 C245 1.2(8) . . . . ? 
C24 C241 C246 C245 -177.9(5) . . . . ? 
C244 C245 C246 C241 -1.9(9) . . . . ? 
C25 C26 C261 C262 -123.2(6) . . . . ? 
C21 C26 C261 C262 56.6(7) . . . . ? 
C25 C26 C261 C266 55.9(7) . . . . ? 
C21 C26 C261 C266 -124.3(6) . . . . ? 
C266 C261 C262 C263 1.6(8) . . . . ? 
C26 C261 C262 C263 -179.3(5) . . . . ? 
C261 C262 C263 C264 -0.4(9) . . . . ? 
C262 C263 C264 C265 -1.3(9) . . . . ? 
C263 C264 C265 C266 1.7(9) . . . . ? 
C264 C265 C266 C261 -0.4(9) . . . . ? 
C262 C261 C266 C265 -1.2(8) . . . . ? 
C26 C261 C266 C265 179.7(5) . . . . ? 
 
 
data_4 
 
_audit_creation_method            SHELXL-97 
_chemical_name_systematic 
; 
 ? 
; 
_chemical_name_common             'Iron Hydrazine Dimer (4)' 
_chemical_melting_point           ? 
_chemical_formula_moiety          ? 
_chemical_formula_sum 
 'C96 H92 Fe2 N12 O0 S4' 
_chemical_formula_structural      
'Fe2(N2H4)6(C24H17S)4, (N2H4), (C4H8O)1.5)'
_chemical_formula_weight          1653.76 
_chemical_compound_source         'Chemical Synthesis, S.C. Lee Lab'
 
loop_ 
 _atom_type_symbol 
 _atom_type_description 
 _atom_type_scat_dispersion_real 
 _atom_type_scat_dispersion_imag 
 _atom_type_scat_source 
 'C'  'C'   0.0033   0.0016 
 'International Tables Vol C Tables 4.2.6.8 and 6.1.1.4' 
 'H'  'H'   0.0000   0.0000 
 'International Tables Vol C Tables 4.2.6.8 and 6.1.1.4' 
 'N'  'N'   0.0061   0.0033 
 'International Tables Vol C Tables 4.2.6.8 and 6.1.1.4' 
 'O'  'O'   0.0106   0.0060 
 'International Tables Vol C Tables 4.2.6.8 and 6.1.1.4' 
 'S'  'S'   0.1246   0.1234 
 'International Tables Vol C Tables 4.2.6.8 and 6.1.1.4' 
 'Fe'  'Fe'   0.3463   0.8444 
 'International Tables Vol C Tables 4.2.6.8 and 6.1.1.4' 
 
_symmetry_cell_setting            'triclinic' 
_symmetry_space_group_name_H-M    'P -1' 
 
loop_ 
 _symmetry_equiv_pos_as_xyz 
 'x, y, z' 
 '-x, -y, -z' 
 
_cell_length_a                    13.5817(14) 
_cell_length_b                    18.8132(15) 
_cell_length_c                    19.608(2) 
_cell_angle_alpha                 68.624(5) 
_cell_angle_beta                  89.564(4) 
_cell_angle_gamma                 83.087(5) 
_cell_volume                      4627.9(8) 
_cell_formula_units_Z             2 
_cell_measurement_temperature     200(2) 
_cell_measurement_reflns_used     12032 
_cell_measurement_theta_min       1.12 
_cell_measurement_theta_max       25.07 
 
_exptl_crystal_description        'Plate' 
_exptl_crystal_colour             'Yellow' 
_exptl_crystal_size_max           0.20 
_exptl_crystal_size_mid           0.13 
_exptl_crystal_size_min           0.05 
_exptl_crystal_density_meas       ? 
_exptl_crystal_density_diffrn     1.187 
_exptl_crystal_density_method     'not measured' 
_exptl_crystal_F_000              1736 
_exptl_absorpt_coefficient_mu     0.454 
_exptl_absorpt_correction_type    'none' 
_exptl_absorpt_correction_T_min   ? 
_exptl_absorpt_correction_T_max   ? 
_exptl_absorpt_process_details    ? 
 
_exptl_special_details 
; 
Disorderes solvent was squeezed out.  
True formula is reflected in the 
_chemical_formula_moiety line 
; 
 
_diffrn_ambient_temperature       200(2) 
_diffrn_radiation_wavelength      0.71073 
_diffrn_radiation_type            MoK\a 
_diffrn_radiation_source          'fine-focus sealed tube' 
_diffrn_radiation_monochromator   graphite 
_diffrn_measurement_device_type   ? 
_diffrn_measurement_method        ? 
_diffrn_detector_area_resol_mean  ? 
_diffrn_standards_number          0 
_diffrn_standards_interval_count  ? 
_diffrn_standards_interval_time   ? 
_diffrn_standards_decay_%         ? 
_diffrn_reflns_number             16131 
_diffrn_reflns_av_R_equivalents   0.0000 
_diffrn_reflns_av_sigmaI/netI     0.0891 
_diffrn_reflns_limit_h_min        0 
_diffrn_reflns_limit_h_max        16 
_diffrn_reflns_limit_k_min        -22 
_diffrn_reflns_limit_k_max        22 
_diffrn_reflns_limit_l_min        -23 
_diffrn_reflns_limit_l_max        23 
_diffrn_reflns_theta_min          1.12 
_diffrn_reflns_theta_max          25.07 
_diffrn_measured_fraction_theta_max    0.981 
_diffrn_reflns_theta_full              25.07 
_diffrn_measured_fraction_theta_full   0.981 
_refine_diff_density_max    0.467 
_refine_diff_density_min   -0.383 
_refine_diff_density_rms    0.062 

_reflns_number_total              16131 
_reflns_number_gt                 10674 
_reflns_threshold_expression      >2sigma(I) 
 
_computing_data_collection        'NONIUS COLLECT'
_computing_cell_refinement        'DENZO-SMN'
_computing_data_reduction         'DENZO-SMN, Platon, Siemens SHELXTL'
_computing_structure_solution     'Siemens SHELXTL'
_computing_structure_refinement   'Siemens SHELXTL'
_computing_molecular_graphics     'Siemens SHELXTL'
_computing_publication_material   'CIFTAB, Siemens SHELXTL' 
 
_refine_special_details 
; 
 Refinement of F^2^ against ALL reflections.  The weighted R-factor wR and 
 goodness of fit S are based on F^2^, conventional R-factors R are based 
 on F, with F set to zero for negative F^2^. The threshold expression of 
 F^2^ > 2sigma(F^2^) is used only for calculating R-factors(gt) etc. and is 
 not relevant to the choice of reflections for refinement.  R-factors based 
 on F^2^ are statistically about twice as large as those based on F, and R- 
 factors based on ALL data will be even larger. 
; 
 
_refine_ls_structure_factor_coef  Fsqd  
_refine_ls_matrix_type            full 
_refine_ls_weighting_scheme       calc  
_refine_ls_weighting_details 
 'calc w=1/[\s^2^(Fo^2^)+(0.0616P)^2^+0.0000P] where P=(Fo^2^+2Fc^2^)/3' 
_atom_sites_solution_primary      direct 
_atom_sites_solution_secondary    difmap 
_atom_sites_solution_hydrogens    geom 
_refine_ls_hydrogen_treatment     mixed 
_refine_ls_extinction_method      none 
_refine_ls_extinction_coef        ? 
_refine_ls_number_reflns          16131 
_refine_ls_number_parameters      1148 
_refine_ls_number_restraints      89 
_refine_ls_R_factor_all           0.0887 
_refine_ls_R_factor_gt            0.0531 
_refine_ls_wR_factor_ref          0.1349 
_refine_ls_wR_factor_gt           0.1227 
_refine_ls_goodness_of_fit_ref    1.028 
_refine_ls_restrained_S_all       1.043 
_refine_ls_shift/su_max           0.001 
_refine_ls_shift/su_mean          0.000 
 
loop_
  _platon_squeeze_void_nr             
  _platon_squeeze_void_average_x      
  _platon_squeeze_void_average_y      
  _platon_squeeze_void_average_z      
  _platon_squeeze_void_volume         
  _platon_squeeze_void_count_electrons
         1     0.000     0.000     0.500     128.1      32.3
         2     0.500     1.000     0.000     463.0      76.2
         3     0.222     0.536     0.261      11.4       1.0
         4     0.778     0.464     0.739      11.4       0.9
_platon_squeeze_details             
;
Disordered solvent THF and N2H4 squeezed out, and replaced with dummy
atoms.  Identity of THF on special position is not confirmed to a high
level of certainty.  The disorder-treated model using THF refined to 
better statistics than the disorder-treated model which used N2H4 at 
the special position solvent.
;

loop_ 
 _atom_site_label 
 _atom_site_type_symbol 
 _atom_site_fract_x 
 _atom_site_fract_y 
 _atom_site_fract_z 
 _atom_site_U_iso_or_equiv 
 _atom_site_adp_type 
 _atom_site_occupancy 
 _atom_site_symmetry_multiplicity 
 _atom_site_calc_flag 
 _atom_site_refinement_flags 
 _atom_site_disorder_assembly 
 _atom_site_disorder_group 
Fe1 Fe -0.03112(3) 0.39362(3) 0.49155(2) 0.02754(12) Uani 1 1 d . . . 
Fe2 Fe 0.53932(3) 0.39167(2) -0.01537(2) 0.02488(12) Uani 1 1 d . . . 
N1 N -0.11231(18) 0.51127(15) 0.46208(16) 0.0263(6) Uani 1 1 d . . . 
H1A H -0.144(2) 0.5165(19) 0.5054(19) 0.040(9) Uiso 1 1 d . . . 
H1B H -0.154(3) 0.516(2) 0.431(2) 0.060(13) Uiso 1 1 d . . . 
N2 N -0.0605(2) 0.57836(17) 0.43019(15) 0.0302(6) Uani 1 1 d . . . 
H2A H -0.018(2) 0.5722(17) 0.4029(16) 0.020(9) Uiso 1 1 d . . . 
H2B H -0.102(2) 0.616(2) 0.4037(18) 0.035(10) Uiso 1 1 d . . . 
N3 N -0.1347(2) 0.37847(18) 0.41386(16) 0.0467(8) Uani 1 1 d . . . 
H3A H -0.1038 0.3428 0.3962 0.056 Uiso 0.590(7) 1 calc PR A 1 
H3B H -0.1886 0.3584 0.4390 0.056 Uiso 0.590(7) 1 calc PR A 1 
H3C H -0.1343 0.3274 0.4262 0.056 Uiso 0.410(7) 1 d PR A 2 
H3D H -0.1086 0.3962 0.3693 0.056 Uiso 0.410(7) 1 d PR A 2 
N4 N -0.1690(3) 0.4451(3) 0.3542(3) 0.0415(17) Uani 0.590(7) 1 d P A 1 
H4A H -0.2107 0.4327 0.3261 0.062 Uiso 0.590(7) 1 d PR A 1 
H4B H -0.1171 0.4640 0.3280 0.062 Uiso 0.590(7) 1 d PR A 1 
N4* N -0.2287(5) 0.4101(5) 0.4053(4) 0.050(3) Uani 0.410(7) 1 d P A 2 
H4*A H -0.2583 0.3975 0.3712 0.075 Uiso 0.410(7) 1 d PR A 2 
H4*B H -0.2591 0.3915 0.4480 0.075 Uiso 0.410(7) 1 d PR A 2 
N5 N 0.0458(2) 0.27344(19) 0.5288(2) 0.0440(8) Uani 1 1 d . . . 
H5A H 0.063(3) 0.252(2) 0.577(2) 0.063(14) Uiso 1 1 d . . . 
H5B H 0.091(3) 0.266(3) 0.507(3) 0.082(18) Uiso 1 1 d . . . 
N6 N -0.0073(3) 0.2222(2) 0.5098(2) 0.0688(10) Uani 1 1 d . A . 
H6A H 0.0276 0.1750 0.5263 0.103 Uiso 1 1 d R . . 
H6B H -0.0666 0.2202 0.5308 0.103 Uiso 1 1 d R . . 
N7 N 0.41880(18) 0.43443(17) 0.04293(16) 0.0272(6) Uani 1 1 d . . . 
H7A H 0.391(3) 0.391(2) 0.075(2) 0.059(12) Uiso 1 1 d . . . 
H7B H 0.377(2) 0.463(2) 0.008(2) 0.044(11) Uiso 1 1 d . . . 
N8 N 0.4470(2) 0.48496(15) 0.07838(14) 0.0255(6) Uani 1 1 d . . . 
H8A H 0.499(2) 0.4634(15) 0.1028(14) 0.009(7) Uiso 1 1 d . . . 
H8B H 0.405(2) 0.4836(18) 0.1074(18) 0.030(10) Uiso 1 1 d . . . 
N9 N 0.5172(2) 0.27012(17) 0.04789(17) 0.0353(7) Uani 1 1 d . . . 
H9A H 0.450(3) 0.265(2) 0.059(2) 0.060(12) Uiso 1 1 d . . . 
H9B H 0.548(3) 0.254(2) 0.091(2) 0.077(15) Uiso 1 1 d . . . 
N10 N 0.5598(2) 0.21515(18) 0.01798(18) 0.0544(8) Uani 1 1 d . . . 
H10A H 0.5485 0.1674 0.0466 0.082 Uiso 1 1 d R . . 
H10B H 0.5319 0.2273 -0.0270 0.082 Uiso 1 1 d R . . 
N11 N 0.6530(2) 0.36612(19) -0.08720(18) 0.0343(7) Uani 1 1 d . . . 
H11A H 0.621(3) 0.375(2) -0.129(2) 0.063(13) Uiso 1 1 d . . . 
H11B H 0.678(3) 0.321(2) -0.070(2) 0.052(13) Uiso 1 1 d . . . 
N12 N 0.7295(2) 0.41618(18) -0.10498(18) 0.0390(7) Uani 1 1 d . . . 
H12A H 0.786(3) 0.392(3) -0.119(2) 0.084(15) Uiso 1 1 d . . . 
H12B H 0.750(2) 0.4154(19) -0.0631(19) 0.035(10) Uiso 1 1 d . . . 
S1 S 0.08744(5) 0.44270(5) 0.39254(4) 0.03034(19) Uani 1 1 d . . . 
S2 S -0.15679(5) 0.35692(5) 0.58706(4) 0.0312(2) Uani 1 1 d . . . 
S3 S 0.41199(5) 0.40710(5) -0.11232(4) 0.02786(19) Uani 1 1 d . . . 
S4 S 0.67139(5) 0.39042(4) 0.07276(4) 0.02606(18) Uani 1 1 d . . . 
C11 C 0.1633(2) 0.36095(18) 0.38948(16) 0.0286(7) Uani 1 1 d . A . 
C12 C 0.1346(2) 0.31876(19) 0.34806(17) 0.0313(7) Uani 1 1 d . . . 
C13 C 0.1889(2) 0.2495(2) 0.35412(18) 0.0368(8) Uani 1 1 d . A . 
H13A H 0.1670 0.2217 0.3265 0.044 Uiso 1 1 calc R . . 
C14 C 0.2744(2) 0.2188(2) 0.39897(18) 0.0359(8) Uani 1 1 d . . . 
C15 C 0.3051(2) 0.2610(2) 0.43820(17) 0.0335(8) Uani 1 1 d . A . 
H15A H 0.3633 0.2415 0.4692 0.040 Uiso 1 1 calc R . . 
C16 C 0.2527(2) 0.33146(18) 0.43334(16) 0.0287(7) Uani 1 1 d . . . 
C21 C 0.0445(2) 0.3459(2) 0.29717(17) 0.0333(8) Uani 1 1 d . A . 
C22 C -0.0252(2) 0.2963(2) 0.3011(2) 0.0445(9) Uani 1 1 d . . . 
H22A H -0.0166 0.2457 0.3372 0.053 Uiso 1 1 calc R A . 
C23 C -0.1076(2) 0.3201(3) 0.2527(2) 0.0507(10) Uani 1 1 d . A . 
H23A H -0.1548 0.2858 0.2557 0.061 Uiso 1 1 calc R . . 
C24 C -0.1204(2) 0.3931(3) 0.2007(2) 0.0495(10) Uani 1 1 d . . . 
H24A H -0.1771 0.4099 0.1681 0.059 Uiso 1 1 calc R A . 
C25 C -0.0508(2) 0.4420(2) 0.19578(19) 0.0447(9) Uani 1 1 d . A . 
H25A H -0.0591 0.4922 0.1591 0.054 Uiso 1 1 calc R . . 
C26 C 0.0313(2) 0.4188(2) 0.24382(18) 0.0381(8) Uani 1 1 d . . . 
H26A H 0.0787 0.4532 0.2400 0.046 Uiso 1 1 calc R A . 
C31 C 0.3308(3) 0.1446(2) 0.40334(19) 0.0452(9) Uani 1 1 d . A . 
C32 C 0.4336(3) 0.1329(3) 0.4107(2) 0.0664(12) Uani 1 1 d . . . 
H32A H 0.4684 0.1730 0.4127 0.080 Uiso 1 1 calc R A . 
C33 C 0.4860(4) 0.0635(3) 0.4153(3) 0.0957(18) Uani 1 1 d . A . 
H33A H 0.5563 0.0555 0.4213 0.115 Uiso 1 1 calc R . . 
C34 C 0.4349(5) 0.0060(4) 0.4109(3) 0.114(2) Uani 1 1 d . . . 
H34A H 0.4707 -0.0410 0.4119 0.137 Uiso 1 1 calc R A . 
C35 C 0.3361(5) 0.0156(3) 0.4052(3) 0.113(2) Uani 1 1 d . A . 
H35A H 0.3017 -0.0252 0.4046 0.136 Uiso 1 1 calc R . . 
C36 C 0.2837(3) 0.0854(3) 0.4002(3) 0.0793(15) Uani 1 1 d . . . 
H36A H 0.2134 0.0924 0.3945 0.095 Uiso 1 1 calc R A . 
C41 C 0.2926(2) 0.37250(19) 0.47781(17) 0.0310(8) Uani 1 1 d . A . 
C42 C 0.3161(2) 0.4466(2) 0.44527(18) 0.0328(8) Uani 1 1 d . . . 
H42A H 0.3034 0.4732 0.3941 0.039 Uiso 1 1 calc R A . 
C43 C 0.3576(2) 0.4827(2) 0.4859(2) 0.0390(8) Uani 1 1 d . A . 
H43A H 0.3740 0.5335 0.4626 0.047 Uiso 1 1 calc R . . 
C44 C 0.3754(2) 0.4447(2) 0.5601(2) 0.0427(9) Uani 1 1 d . . . 
H44A H 0.4041 0.4693 0.5882 0.051 Uiso 1 1 calc R A . 
C45 C 0.3515(2) 0.3712(2) 0.5939(2) 0.0464(9) Uani 1 1 d . A . 
H45A H 0.3629 0.3453 0.6453 0.056 Uiso 1 1 calc R . . 
C46 C 0.3110(2) 0.3352(2) 0.55290(18) 0.0379(8) Uani 1 1 d . . . 
H46A H 0.2954 0.2842 0.5763 0.045 Uiso 1 1 calc R A . 
C51 C -0.1455(2) 0.25832(18) 0.64065(16) 0.0275(7) Uani 1 1 d . A . 
C52 C -0.2050(2) 0.20934(18) 0.62440(17) 0.0306(7) Uani 1 1 d . . . 
C53 C -0.1937(2) 0.13124(19) 0.66607(18) 0.0372(8) Uani 1 1 d . A . 
H53A H -0.2340 0.0994 0.6539 0.045 Uiso 1 1 calc R . . 
C54 C -0.1253(2) 0.0976(2) 0.72532(19) 0.0384(8) Uani 1 1 d . . . 
C55 C -0.0682(2) 0.1459(2) 0.74139(18) 0.0363(8) Uani 1 1 d . A . 
H55A H -0.0217 0.1246 0.7818 0.044 Uiso 1 1 calc R . . 
C56 C -0.0761(2) 0.22444(19) 0.70089(17) 0.0321(8) Uani 1 1 d . . . 
C61 C -0.2770(2) 0.23725(18) 0.55932(17) 0.0299(7) Uani 1 1 d . A . 
C62 C -0.3574(2) 0.2933(2) 0.55269(19) 0.0422(9) Uani 1 1 d . . . 
H62A H -0.3669 0.3152 0.5893 0.051 Uiso 1 1 calc R A . 
C63 C -0.4240(2) 0.3172(2) 0.4924(2) 0.0504(10) Uani 1 1 d . A . 
H63A H -0.4787 0.3554 0.4880 0.061 Uiso 1 1 calc R . . 
C64 C -0.4103(3) 0.2858(2) 0.4396(2) 0.0531(10) Uani 1 1 d . . . 
H64A H -0.4555 0.3021 0.3985 0.064 Uiso 1 1 calc R A . 
C65 C -0.3316(3) 0.2308(2) 0.4461(2) 0.0546(10) Uani 1 1 d . A . 
H65A H -0.3219 0.2092 0.4093 0.066 Uiso 1 1 calc R . . 
C66 C -0.2658(3) 0.2064(2) 0.5062(2) 0.0459(9) Uani 1 1 d . . . 
H66A H -0.2120 0.1676 0.5104 0.055 Uiso 1 1 calc R A . 
C71 C -0.1117(2) 0.0134(2) 0.7673(2) 0.0450(9) Uani 1 1 d . A . 
C72 C -0.1126(4) -0.0370(3) 0.7317(3) 0.0784(14) Uani 1 1 d . . . 
H72A H -0.1255 -0.0179 0.6802 0.094 Uiso 1 1 calc R A . 
C73 C -0.0945(4) -0.1168(3) 0.7707(3) 0.0979(19) Uani 1 1 d . A . 
H73A H -0.0947 -0.1510 0.7450 0.118 Uiso 1 1 calc R . . 
C74 C -0.0770(3) -0.1455(3) 0.8434(3) 0.0757(15) Uani 1 1 d . . . 
H74A H -0.0668 -0.1996 0.8696 0.091 Uiso 1 1 calc R A . 
C75 C -0.0742(3) -0.0964(3) 0.8785(3) 0.0802(16) Uani 1 1 d . A . 
H75A H -0.0598 -0.1161 0.9299 0.096 Uiso 1 1 calc R . . 
C76 C -0.0918(3) -0.0181(2) 0.8416(2) 0.0669(13) Uani 1 1 d . . . 
H76A H -0.0902 0.0151 0.8682 0.080 Uiso 1 1 calc R A . 
C81 C -0.0042(2) 0.2688(2) 0.72022(17) 0.0372(8) Uani 1 1 d . A . 
C82 C 0.0978(2) 0.2422(2) 0.7257(2) 0.0488(10) Uani 1 1 d . . . 
H82A H 0.1196 0.1967 0.7165 0.059 Uiso 1 1 calc R A . 
C83 C 0.1668(3) 0.2809(3) 0.7443(2) 0.0648(13) Uani 1 1 d . A . 
H83A H 0.2355 0.2624 0.7469 0.078 Uiso 1 1 calc R . . 
C84 C 0.1371(3) 0.3456(3) 0.7588(2) 0.0661(13) Uani 1 1 d . . . 
H84A H 0.1850 0.3717 0.7718 0.079 Uiso 1 1 calc R A . 
C85 C 0.0362(3) 0.3735(2) 0.75462(19) 0.0536(10) Uani 1 1 d . A . 
H85A H 0.0151 0.4186 0.7646 0.064 Uiso 1 1 calc R . . 
C86 C -0.0330(3) 0.3342(2) 0.73554(17) 0.0441(9) Uani 1 1 d . . . 
H86A H -0.1016 0.3528 0.7330 0.053 Uiso 1 1 calc R A . 
C91 C 0.36549(19) 0.32024(17) -0.09988(16) 0.0258(7) Uani 1 1 d . . . 
C92 C 0.4063(2) 0.27091(19) -0.13526(16) 0.0289(7) Uani 1 1 d . . . 
C93 C 0.3674(2) 0.20289(19) -0.12496(18) 0.0345(8) Uani 1 1 d . . . 
H93A H 0.3967 0.1703 -0.1489 0.041 Uiso 1 1 calc R . . 
C94 C 0.2873(2) 0.18056(19) -0.08110(19) 0.0346(8) Uani 1 1 d . . . 
C95 C 0.2495(2) 0.22801(19) -0.04442(18) 0.0332(8) Uani 1 1 d . . . 
H95A H 0.1960 0.2134 -0.0129 0.040 Uiso 1 1 calc R . . 
C96 C 0.2869(2) 0.29594(18) -0.05197(17) 0.0278(7) Uani 1 1 d . . . 
C101 C 0.4934(2) 0.2887(2) -0.18252(19) 0.0375(8) Uani 1 1 d . . . 
C102 C 0.5788(2) 0.2346(2) -0.1669(2) 0.0507(10) Uani 1 1 d . . . 
H10C H 0.5805 0.1862 -0.1278 0.061 Uiso 1 1 calc R . . 
C103 C 0.6625(3) 0.2534(3) -0.2105(3) 0.0640(13) Uani 1 1 d . . . 
H10D H 0.7206 0.2171 -0.2005 0.077 Uiso 1 1 calc R . . 
C104 C 0.6608(3) 0.3227(3) -0.2664(3) 0.0662(13) Uani 1 1 d . . . 
H10E H 0.7182 0.3352 -0.2942 0.079 Uiso 1 1 calc R . . 
C105 C 0.5759(3) 0.3748(3) -0.2828(2) 0.0596(12) Uani 1 1 d . . . 
H10F H 0.5742 0.4227 -0.3225 0.071 Uiso 1 1 calc R . . 
C106 C 0.4926(2) 0.3572(2) -0.24118(19) 0.0418(9) Uani 1 1 d . . . 
H10G H 0.4341 0.3931 -0.2534 0.050 Uiso 1 1 calc R . . 
C111 C 0.2418(2) 0.1110(2) -0.0747(2) 0.0428(9) Uani 1 1 d . . . 
C112 C 0.1386(3) 0.1128(2) -0.0729(2) 0.0527(10) Uani 1 1 d . . . 
H11C H 0.0983 0.1592 -0.0769 0.063 Uiso 1 1 calc R . . 
C113 C 0.0945(3) 0.0479(2) -0.0654(2) 0.0622(12) Uani 1 1 d . . . 
H11D H 0.0243 0.0498 -0.0640 0.075 Uiso 1 1 calc R . . 
C114 C 0.1525(3) -0.0194(3) -0.0600(3) 0.0863(17) Uani 1 1 d . . . 
H11E H 0.1224 -0.0641 -0.0548 0.104 Uiso 1 1 calc R . . 
C115 C 0.2528(4) -0.0218(3) -0.0622(4) 0.104(2) Uani 1 1 d . . . 
H11F H 0.2927 -0.0684 -0.0579 0.125 Uiso 1 1 calc R . . 
C116 C 0.2970(3) 0.0431(3) -0.0706(3) 0.0751(14) Uani 1 1 d . . . 
H11G H 0.3671 0.0408 -0.0737 0.090 Uiso 1 1 calc R . . 
C121 C 0.2426(2) 0.34017(18) -0.00722(17) 0.0295(7) Uani 1 1 d . . . 
C122 C 0.2039(2) 0.41765(19) -0.03854(19) 0.0335(8) Uani 1 1 d . . . 
H12C H 0.2071 0.4439 -0.0899 0.040 Uiso 1 1 calc R . . 
C123 C 0.1611(2) 0.4566(2) 0.0036(2) 0.0459(9) Uani 1 1 d . . . 
H12D H 0.1357 0.5095 -0.0186 0.055 Uiso 1 1 calc R . . 
C124 C 0.1552(3) 0.4196(3) 0.0772(2) 0.0545(11) Uani 1 1 d . . . 
H12E H 0.1259 0.4469 0.1061 0.065 Uiso 1 1 calc R . . 
C125 C 0.1913(3) 0.3432(3) 0.1100(2) 0.0514(10) Uani 1 1 d . . . 
H12F H 0.1866 0.3177 0.1614 0.062 Uiso 1 1 calc R . . 
C126 C 0.2350(2) 0.3028(2) 0.06778(18) 0.0404(8) Uani 1 1 d . . . 
H12G H 0.2595 0.2498 0.0904 0.049 Uiso 1 1 calc R . . 
C131 C 0.6979(2) 0.29570(17) 0.13658(16) 0.0257(7) Uani 1 1 d . . . 
C132 C 0.7716(2) 0.24206(18) 0.12326(17) 0.0297(7) Uani 1 1 d . . . 
C133 C 0.7870(2) 0.16711(19) 0.17103(18) 0.0371(8) Uani 1 1 d . . . 
H13B H 0.8363 0.1325 0.1607 0.044 Uiso 1 1 calc R . . 
C134 C 0.7334(2) 0.1398(2) 0.23403(19) 0.0423(9) Uani 1 1 d . B . 
C135 C 0.6623(2) 0.19249(19) 0.24839(17) 0.0342(8) Uani 1 1 d . . . 
H13C H 0.6249 0.1756 0.2913 0.041 Uiso 1 1 calc R . . 
C136 C 0.6452(2) 0.26915(18) 0.20117(16) 0.0274(7) Uani 1 1 d . . . 
C141 C 0.8350(2) 0.26398(18) 0.05812(16) 0.0273(7) Uani 1 1 d . . . 
C142 C 0.9041(2) 0.31499(19) 0.04953(18) 0.0342(8) Uani 1 1 d . . . 
H14A H 0.9068 0.3404 0.0833 0.041 Uiso 1 1 calc R . . 
C143 C 0.9689(2) 0.3295(2) -0.0071(2) 0.0442(9) Uani 1 1 d . . . 
H14B H 1.0163 0.3641 -0.0117 0.053 Uiso 1 1 calc R . . 
C144 C 0.9647(2) 0.2935(2) -0.0575(2) 0.0472(10) Uani 1 1 d . . . 
H14C H 1.0093 0.3031 -0.0966 0.057 Uiso 1 1 calc R . . 
C145 C 0.8951(3) 0.2438(2) -0.05004(19) 0.0471(10) Uani 1 1 d . . . 
H14D H 0.8912 0.2197 -0.0847 0.057 Uiso 1 1 calc R . . 
C146 C 0.8305(2) 0.2286(2) 0.00767(18) 0.0374(8) Uani 1 1 d . . . 
H14E H 0.7832 0.1938 0.0124 0.045 Uiso 1 1 calc R . . 
C151 C 0.7485(3) 0.0581(2) 0.2839(2) 0.0617(12) Uani 1 1 d D . . 
C152 C 0.6856(6) 0.0204(4) 0.3271(4) 0.101(3) Uani 0.598(5) 1 d PDU B 1 
H152 H 0.6210 0.0473 0.3244 0.121 Uiso 0.598(5) 1 calc PR B 1 
C153 C 0.7002(7) -0.0549(5) 0.3774(5) 0.107(4) Uani 0.598(5) 1 d PDU B 1 
H153 H 0.6480 -0.0778 0.4065 0.128 Uiso 0.598(5) 1 calc PR B 1 
C154 C 0.7936(7) -0.0951(5) 0.3830(5) 0.103(4) Uani 0.598(5) 1 d PDU B 1 
H154 H 0.8075 -0.1462 0.4178 0.123 Uiso 0.598(5) 1 calc PR B 1 
C155 C 0.8648(5) -0.0618(4) 0.3392(4) 0.072(2) Uani 0.598(5) 1 d PDU B 1 
H155 H 0.9282 -0.0904 0.3418 0.086 Uiso 0.598(5) 1 calc PR B 1 
C156 C 0.8471(4) 0.0136(3) 0.2905(3) 0.054(2) Uani 0.598(5) 1 d PDU B 1 
H156 H 0.8990 0.0367 0.2612 0.065 Uiso 0.598(5) 1 calc PR B 1 
C52* C 0.7393(5) 0.0004(6) 0.2525(7) 0.086(4) Uani 0.402(5) 1 d PDU B 2 
H52* H 0.7356 0.0152 0.2007 0.103 Uiso 0.402(5) 1 calc PR B 2 
C53* C 0.7355(7) -0.0782(7) 0.2976(8) 0.107(5) Uani 0.402(5) 1 d PDU B 2 
H53* H 0.7294 -0.1174 0.2787 0.128 Uiso 0.402(5) 1 calc PR B 2 
C54* C 0.7417(8) -0.0914(10) 0.3713(11) 0.115(7) Uani 0.402(5) 1 d PDU B 2 
H54* H 0.7390 -0.1432 0.4030 0.138 Uiso 0.402(5) 1 calc PR B 2 
C55* C 0.7518(8) -0.0380(8) 0.4074(8) 0.098(5) Uani 0.402(5) 1 d PDU B 2 
H55* H 0.7577 -0.0530 0.4592 0.118 Uiso 0.402(5) 1 calc PR B 2 
C56* C 0.7520(6) 0.0380(6) 0.3589(6) 0.067(3) Uani 0.402(5) 1 d PDU B 2 
H56* H 0.7545 0.0772 0.3784 0.080 Uiso 0.402(5) 1 calc PR B 2 
C171 C 0.5670(2) 0.31994(18) 0.22214(16) 0.0295(7) Uani 1 1 d . . . 
C172 C 0.4690(2) 0.3019(2) 0.23109(18) 0.0399(8) Uani 1 1 d . . . 
H17A H 0.4521 0.2582 0.2226 0.048 Uiso 1 1 calc R . . 
C173 C 0.3966(2) 0.3479(2) 0.25225(19) 0.0472(10) Uani 1 1 d . . . 
H17B H 0.3304 0.3357 0.2578 0.057 Uiso 1 1 calc R . . 
C174 C 0.4207(3) 0.4108(2) 0.26513(19) 0.0497(10) Uani 1 1 d . . . 
H17C H 0.3713 0.4422 0.2795 0.060 Uiso 1 1 calc R . . 
C175 C 0.5171(3) 0.4283(2) 0.25707(18) 0.0444(9) Uani 1 1 d . . . 
H17D H 0.5338 0.4717 0.2664 0.053 Uiso 1 1 calc R . . 
C176 C 0.5892(2) 0.38348(19) 0.23566(16) 0.0352(8) Uani 1 1 d . . . 
H17E H 0.6551 0.3964 0.2301 0.042 Uiso 1 1 calc R . . 
N1S N 0.5129 -0.1714 0.3410 0.050 Uiso 0.00 1 d P . . 
H1SA H 0.5329 -0.2205 0.3679 0.050 Uiso 0.00 1 d P . . 
H1SB H 0.4505 -0.1666 0.3247 0.050 Uiso 0.00 1 d P . . 
N2S N 0.5746 -0.1463 0.2809 0.050 Uiso 0.00 1 d P . . 
H2SA H 0.6070 -0.1094 0.2846 0.050 Uiso 0.00 1 d P . . 
H2SB H 0.6180 -0.1857 0.2809 0.050 Uiso 0.00 1 d P . . 
O1S O 0.5834 -0.1189 -0.1269 0.050 Uiso 0.00 1 d P . . 
C1S C 0.5729 -0.0888 -0.1992 0.050 Uiso 0.00 1 d P . . 
H1S1 H 0.5083 -0.0958 -0.2147 0.050 Uiso 0.00 1 d P . . 
H1S2 H 0.6234 -0.1142 -0.2207 0.050 Uiso 0.00 1 d P . . 
C2S C 0.5827 -0.0057 -0.2238 0.050 Uiso 0.00 1 d P . . 
H2S1 H 0.6368 0.0069 -0.2570 0.050 Uiso 0.00 1 d P . . 
H2S2 H 0.5218 0.0251 -0.2487 0.050 Uiso 0.00 1 d P . . 
C3S C 0.6030 0.0078 -0.1564 0.050 Uiso 0.00 1 d P . . 
H3S1 H 0.6567 0.0388 -0.1618 0.050 Uiso 0.00 1 d P . . 
H3S2 H 0.5444 0.0319 -0.1409 0.050 Uiso 0.00 1 d P . . 
C4S C 0.6303 -0.0686 -0.1078 0.050 Uiso 0.00 1 d P . . 
H4S1 H 0.7016 -0.0818 -0.1082 0.050 Uiso 0.00 1 d P . . 
H4S2 H 0.6135 -0.0729 -0.0584 0.050 Uiso 0.00 1 d P . . 
O2S O -0.0744 0.0804 0.4371 0.050 Uiso 0.00 1 d P . . 
C6S C -0.0671 0.0265 0.5231 0.050 Uiso 0.00 1 d P . . 
C7S C 0.0172 0.0465 0.4536 0.050 Uiso 0.00 1 d P . . 
 
loop_ 
 _atom_site_aniso_label 
 _atom_site_aniso_U_11 
 _atom_site_aniso_U_22 
 _atom_site_aniso_U_33 
 _atom_site_aniso_U_23 
 _atom_site_aniso_U_13 
 _atom_site_aniso_U_12 
Fe1 0.0269(2) 0.0283(3) 0.0274(3) -0.0100(2) -0.00113(18) -0.00385(19) 
Fe2 0.0246(2) 0.0249(3) 0.0253(3) -0.0093(2) 0.00136(17) -0.00336(18) 
N1 0.0242(13) 0.0314(16) 0.0248(15) -0.0106(13) 0.0003(12) -0.0074(12) 
N2 0.0306(15) 0.0281(17) 0.0273(16) -0.0037(14) 0.0015(14) -0.0068(13) 
N3 0.0502(18) 0.051(2) 0.047(2) -0.0253(17) -0.0024(15) -0.0163(15) 
N4 0.040(3) 0.055(4) 0.030(3) -0.015(3) -0.002(2) -0.010(3) 
N4* 0.026(4) 0.069(6) 0.055(6) -0.023(5) -0.005(3) -0.004(4) 
N5 0.0421(18) 0.0360(19) 0.053(2) -0.0141(17) 0.0119(17) -0.0078(15) 
N6 0.079(2) 0.052(2) 0.092(3) -0.042(2) 0.025(2) -0.0227(19) 
N7 0.0279(14) 0.0237(15) 0.0294(16) -0.0090(13) -0.0020(13) -0.0036(13) 
N8 0.0229(14) 0.0309(16) 0.0211(15) -0.0080(13) 0.0003(13) -0.0018(12) 
N9 0.0380(17) 0.0314(17) 0.0377(19) -0.0129(14) -0.0011(14) -0.0074(13) 
N10 0.0632(19) 0.0364(19) 0.063(2) -0.0190(17) 0.0012(16) -0.0019(16) 
N11 0.0312(15) 0.039(2) 0.0347(18) -0.0164(15) -0.0014(13) -0.0004(14) 
N12 0.0324(16) 0.049(2) 0.0352(19) -0.0143(16) 0.0065(14) -0.0074(14) 
S1 0.0301(4) 0.0356(5) 0.0271(4) -0.0137(4) 0.0008(3) -0.0032(4) 
S2 0.0284(4) 0.0266(4) 0.0329(5) -0.0044(4) 0.0037(3) -0.0029(3) 
S3 0.0276(4) 0.0302(5) 0.0276(4) -0.0115(4) 0.0005(3) -0.0077(3) 
S4 0.0261(4) 0.0244(4) 0.0251(4) -0.0062(3) -0.0018(3) -0.0027(3) 
C11 0.0271(15) 0.0356(19) 0.0233(17) -0.0103(15) 0.0038(13) -0.0065(14) 
C12 0.0296(16) 0.039(2) 0.0290(18) -0.0169(16) 0.0038(14) -0.0068(15) 
C13 0.0366(18) 0.048(2) 0.034(2) -0.0239(18) 0.0025(15) -0.0067(16) 
C14 0.0404(18) 0.036(2) 0.0311(19) -0.0109(16) 0.0078(15) -0.0082(16) 
C15 0.0305(16) 0.041(2) 0.0296(19) -0.0126(16) 0.0034(14) -0.0072(15) 
C16 0.0266(15) 0.0336(19) 0.0267(18) -0.0109(15) 0.0029(13) -0.0081(14) 
C21 0.0312(16) 0.050(2) 0.0262(18) -0.0229(17) 0.0017(14) -0.0052(16) 
C22 0.047(2) 0.053(2) 0.042(2) -0.0261(19) -0.0006(17) -0.0096(18) 
C23 0.040(2) 0.074(3) 0.055(3) -0.040(2) 0.0018(18) -0.018(2) 
C24 0.0363(19) 0.083(3) 0.041(2) -0.038(2) -0.0072(17) -0.002(2) 
C25 0.043(2) 0.062(3) 0.032(2) -0.0212(19) -0.0036(16) -0.0024(19) 
C26 0.0324(17) 0.056(2) 0.033(2) -0.0245(19) 0.0037(15) -0.0064(16) 
C31 0.057(2) 0.043(2) 0.037(2) -0.0193(18) -0.0016(17) 0.0023(19) 
C32 0.061(3) 0.048(3) 0.082(3) -0.019(2) 0.003(2) 0.007(2) 
C33 0.094(4) 0.082(4) 0.109(5) -0.045(4) -0.011(3) 0.035(3) 
C34 0.136(5) 0.088(5) 0.130(5) -0.075(4) -0.057(4) 0.061(4) 
C35 0.143(5) 0.061(4) 0.152(6) -0.068(4) -0.076(5) 0.023(4) 
C36 0.078(3) 0.055(3) 0.118(4) -0.050(3) -0.028(3) 0.003(2) 
C41 0.0218(15) 0.040(2) 0.0305(19) -0.0136(16) -0.0017(13) -0.0006(14) 
C42 0.0225(15) 0.042(2) 0.0363(19) -0.0167(17) 0.0013(13) -0.0061(14) 
C43 0.0296(17) 0.042(2) 0.051(2) -0.0221(19) 0.0004(16) -0.0082(15) 
C44 0.0342(18) 0.053(3) 0.053(2) -0.034(2) -0.0071(16) -0.0041(17) 
C45 0.046(2) 0.056(3) 0.037(2) -0.018(2) -0.0110(17) -0.0060(19) 
C46 0.0375(18) 0.040(2) 0.035(2) -0.0126(17) -0.0062(15) -0.0051(16) 
C51 0.0263(15) 0.0284(18) 0.0261(17) -0.0083(15) 0.0065(13) -0.0029(13) 
C52 0.0299(16) 0.0277(18) 0.0288(18) -0.0049(15) 0.0001(13) -0.0004(14) 
C53 0.0414(18) 0.030(2) 0.038(2) -0.0085(16) -0.0037(15) -0.0088(15) 
C54 0.0390(18) 0.033(2) 0.037(2) -0.0060(17) 0.0015(15) -0.0040(16) 
C55 0.0332(17) 0.039(2) 0.0296(19) -0.0040(16) -0.0048(14) -0.0046(15) 
C56 0.0281(16) 0.0316(19) 0.0313(19) -0.0059(15) 0.0016(14) -0.0020(14) 
C61 0.0308(16) 0.0254(18) 0.0315(19) -0.0063(15) -0.0007(14) -0.0092(14) 
C62 0.0340(18) 0.050(2) 0.039(2) -0.0128(18) -0.0017(16) -0.0034(17) 
C63 0.0356(19) 0.056(3) 0.050(3) -0.011(2) -0.0092(17) 0.0040(18) 
C64 0.057(2) 0.050(3) 0.042(2) -0.004(2) -0.0190(19) -0.007(2) 
C65 0.071(3) 0.056(3) 0.039(2) -0.019(2) -0.011(2) -0.010(2) 
C66 0.052(2) 0.041(2) 0.047(2) -0.0189(19) -0.0057(18) -0.0030(18) 
C71 0.048(2) 0.030(2) 0.046(2) -0.0020(18) -0.0113(17) -0.0033(17) 
C72 0.109(4) 0.040(3) 0.074(3) -0.010(2) -0.025(3) 0.003(3) 
C73 0.132(5) 0.036(3) 0.120(5) -0.025(3) -0.034(4) -0.002(3) 
C74 0.068(3) 0.035(3) 0.095(4) 0.010(3) -0.026(3) -0.005(2) 
C75 0.074(3) 0.055(3) 0.078(3) 0.022(3) -0.028(3) -0.025(3) 
C76 0.075(3) 0.053(3) 0.055(3) 0.006(2) -0.019(2) -0.023(2) 
C81 0.0424(19) 0.037(2) 0.0254(18) -0.0016(16) -0.0024(15) -0.0108(16) 
C82 0.0372(19) 0.048(2) 0.047(2) -0.0006(19) -0.0131(17) -0.0069(17) 
C83 0.050(2) 0.071(3) 0.050(3) 0.010(2) -0.020(2) -0.021(2) 
C84 0.078(3) 0.072(3) 0.036(2) 0.004(2) -0.018(2) -0.044(3) 
C85 0.082(3) 0.052(3) 0.027(2) -0.0079(18) -0.0036(19) -0.030(2) 
C86 0.057(2) 0.049(2) 0.0230(19) -0.0074(17) -0.0023(16) -0.0141(19) 
C91 0.0215(14) 0.0285(18) 0.0284(17) -0.0117(14) -0.0055(13) -0.0025(13) 
C92 0.0247(15) 0.0367(19) 0.0284(18) -0.0156(15) 0.0005(13) -0.0039(14) 
C93 0.0282(16) 0.038(2) 0.046(2) -0.0250(17) 0.0026(15) -0.0022(15) 
C94 0.0295(16) 0.0327(19) 0.045(2) -0.0195(17) -0.0038(15) -0.0009(14) 
C95 0.0265(15) 0.034(2) 0.039(2) -0.0135(16) 0.0033(14) -0.0046(14) 
C96 0.0255(15) 0.0269(18) 0.0305(18) -0.0104(15) -0.0051(13) -0.0018(13) 
C101 0.0339(17) 0.053(2) 0.042(2) -0.035(2) 0.0031(15) -0.0095(17) 
C102 0.040(2) 0.059(3) 0.068(3) -0.043(2) 0.0076(18) -0.0041(19) 
C103 0.034(2) 0.099(4) 0.088(4) -0.071(3) 0.005(2) -0.001(2) 
C104 0.047(2) 0.109(4) 0.071(3) -0.062(3) 0.027(2) -0.027(3) 
C105 0.063(3) 0.092(3) 0.041(2) -0.039(2) 0.018(2) -0.031(2) 
C106 0.0435(19) 0.060(3) 0.034(2) -0.028(2) 0.0048(16) -0.0173(18) 
C111 0.0391(19) 0.038(2) 0.058(2) -0.0250(19) 0.0073(17) -0.0072(16) 
C112 0.049(2) 0.043(2) 0.073(3) -0.028(2) 0.0037(19) -0.0099(18) 
C113 0.050(2) 0.059(3) 0.088(3) -0.037(3) 0.008(2) -0.019(2) 
C114 0.061(3) 0.050(3) 0.168(5) -0.061(3) 0.015(3) -0.016(2) 
C115 0.070(3) 0.055(3) 0.209(7) -0.073(4) 0.029(4) -0.019(3) 
C116 0.051(2) 0.055(3) 0.132(5) -0.046(3) 0.018(3) -0.017(2) 
C121 0.0222(15) 0.0332(19) 0.038(2) -0.0168(16) 0.0011(13) -0.0108(14) 
C122 0.0261(16) 0.036(2) 0.042(2) -0.0171(17) 0.0057(14) -0.0078(14) 
C123 0.0344(18) 0.040(2) 0.072(3) -0.030(2) 0.0163(18) -0.0081(16) 
C124 0.050(2) 0.065(3) 0.071(3) -0.046(3) 0.031(2) -0.026(2) 
C125 0.057(2) 0.071(3) 0.039(2) -0.028(2) 0.0200(18) -0.029(2) 
C126 0.0429(19) 0.042(2) 0.038(2) -0.0133(18) 0.0078(16) -0.0152(17) 
C131 0.0243(15) 0.0260(17) 0.0258(17) -0.0086(14) -0.0059(13) -0.0022(13) 
C132 0.0285(16) 0.0296(19) 0.0284(18) -0.0081(15) -0.0030(13) -0.0021(14) 
C133 0.0385(18) 0.0281(19) 0.038(2) -0.0077(16) 0.0083(15) 0.0055(15) 
C134 0.0448(19) 0.029(2) 0.042(2) -0.0037(17) 0.0092(16) 0.0031(16) 
C135 0.0345(17) 0.033(2) 0.0284(19) -0.0043(15) 0.0062(14) -0.0031(15) 
C136 0.0273(15) 0.0270(18) 0.0276(18) -0.0097(15) 0.0003(13) -0.0040(13) 
C141 0.0220(15) 0.0265(18) 0.0274(18) -0.0054(14) -0.0021(13) 0.0058(13) 
C142 0.0292(16) 0.038(2) 0.0345(19) -0.0125(16) 0.0000(14) -0.0017(15) 
C143 0.0296(17) 0.047(2) 0.045(2) -0.0052(19) 0.0033(16) -0.0023(16) 
C144 0.0348(19) 0.057(3) 0.037(2) -0.0055(19) 0.0098(16) 0.0038(18) 
C145 0.049(2) 0.054(3) 0.035(2) -0.0185(19) 0.0027(17) 0.0131(19) 
C146 0.0367(18) 0.034(2) 0.041(2) -0.0161(17) 0.0013(15) 0.0025(15) 
C151 0.071(3) 0.034(2) 0.056(3) 0.006(2) 0.025(2) 0.010(2) 
C152 0.078(5) 0.051(5) 0.118(7) 0.022(4) 0.045(5) 0.026(4) 
C153 0.086(6) 0.066(6) 0.120(7) 0.015(5) 0.051(5) 0.013(5) 
C154 0.086(6) 0.042(5) 0.129(7) 0.017(5) 0.034(6) 0.030(4) 
C155 0.066(4) 0.050(4) 0.078(5) -0.006(4) 0.024(4) 0.012(4) 
C156 0.053(4) 0.031(3) 0.060(4) -0.002(3) 0.015(3) 0.015(3) 
C52* 0.105(8) 0.041(6) 0.099(8) -0.017(6) 0.020(6) 0.010(5) 
C53* 0.116(8) 0.063(7) 0.133(9) -0.031(7) 0.023(7) 0.003(6) 
C54* 0.114(11) 0.096(10) 0.115(10) -0.017(8) 0.037(8) -0.008(8) 
C55* 0.106(8) 0.078(8) 0.081(8) 0.009(6) 0.008(7) -0.021(7) 
C56* 0.074(6) 0.058(6) 0.053(6) -0.003(5) -0.009(5) -0.006(5) 
C171 0.0321(16) 0.0305(19) 0.0198(17) -0.0032(14) 0.0005(13) 0.0006(14) 
C172 0.0414(19) 0.037(2) 0.037(2) -0.0095(17) 0.0102(15) -0.0028(16) 
C173 0.0329(18) 0.052(3) 0.042(2) -0.0015(19) 0.0120(16) 0.0009(17) 
C174 0.058(2) 0.045(2) 0.033(2) -0.0061(18) 0.0143(17) 0.016(2) 
C175 0.064(2) 0.035(2) 0.029(2) -0.0088(17) 0.0026(17) 0.0033(18) 
C176 0.0407(18) 0.036(2) 0.0242(18) -0.0065(16) 0.0033(14) -0.0016(16) 
 
_geom_special_details 
; 
 All esds (except the esd in the dihedral angle between two l.s. planes) 
 are estimated using the full covariance matrix.  The cell esds are taken 
 into account individually in the estimation of esds in distances, angles 
 and torsion angles; correlations between esds in cell parameters are only 
 used when they are defined by crystal symmetry.  An approximate (isotropic) 
 treatment of cell esds is used for estimating esds involving l.s. planes. 
; 
 
loop_ 
 _geom_bond_atom_site_label_1 
 _geom_bond_atom_site_label_2 
 _geom_bond_distance 
 _geom_bond_site_symmetry_2 
 _geom_bond_publ_flag 
Fe1 N3 2.196(3) . ? 
Fe1 N1 2.222(3) . ? 
Fe1 N2 2.226(3) 2_566 ? 
Fe1 N5 2.231(3) . ? 
Fe1 S2 2.4879(9) . ? 
Fe1 S1 2.4935(9) . ? 
Fe2 N11 2.209(3) . ? 
Fe2 N9 2.225(3) . ? 
Fe2 N8 2.227(3) 2_665 ? 
Fe2 N7 2.227(3) . ? 
Fe2 S4 2.4922(8) . ? 
Fe2 S3 2.4931(8) . ? 
N1 N2 1.453(4) . ? 
N2 Fe1 2.226(3) 2_566 ? 
N3 N4* 1.327(7) . ? 
N3 N4 1.398(5) . ? 
N5 N6 1.422(5) . ? 
N7 N8 1.452(4) . ? 
N8 Fe2 2.227(3) 2_665 ? 
N9 N10 1.429(4) . ? 
N11 N12 1.442(4) . ? 
S1 C11 1.765(3) . ? 
S2 C51 1.756(3) . ? 
S3 C91 1.756(3) . ? 
S4 C131 1.760(3) . ? 
C11 C12 1.411(4) . ? 
C11 C16 1.423(4) . ? 
C12 C13 1.383(4) . ? 
C12 C21 1.500(4) . ? 
C13 C14 1.392(4) . ? 
C14 C15 1.388(4) . ? 
C14 C31 1.483(5) . ? 
C15 C16 1.398(4) . ? 
C16 C41 1.500(4) . ? 
C21 C26 1.380(5) . ? 
C21 C22 1.390(5) . ? 
C22 C23 1.393(5) . ? 
C23 C24 1.372(5) . ? 
C24 C25 1.376(5) . ? 
C25 C26 1.385(4) . ? 
C31 C36 1.368(6) . ? 
C31 C32 1.388(5) . ? 
C32 C33 1.382(6) . ? 
C33 C34 1.382(8) . ? 
C34 C35 1.332(8) . ? 
C35 C36 1.387(6) . ? 
C41 C42 1.381(5) . ? 
C41 C46 1.390(4) . ? 
C42 C43 1.380(4) . ? 
C43 C44 1.377(5) . ? 
C44 C45 1.375(5) . ? 
C45 C46 1.379(5) . ? 
C51 C52 1.414(4) . ? 
C51 C56 1.419(4) . ? 
C52 C53 1.387(4) . ? 
C52 C61 1.506(4) . ? 
C53 C54 1.397(4) . ? 
C54 C55 1.382(5) . ? 
C54 C71 1.485(5) . ? 
C55 C56 1.390(5) . ? 
C56 C81 1.493(5) . ? 
C61 C66 1.365(5) . ? 
C61 C62 1.394(4) . ? 
C62 C63 1.396(5) . ? 
C63 C64 1.369(5) . ? 
C64 C65 1.367(5) . ? 
C65 C66 1.385(5) . ? 
C71 C72 1.368(6) . ? 
C71 C76 1.372(5) . ? 
C72 C73 1.406(6) . ? 
C73 C74 1.339(7) . ? 
C74 C75 1.344(7) . ? 
C75 C76 1.375(6) . ? 
C81 C86 1.381(5) . ? 
C81 C82 1.407(4) . ? 
C82 C83 1.380(5) . ? 
C83 C84 1.362(6) . ? 
C84 C85 1.399(6) . ? 
C85 C86 1.395(5) . ? 
C91 C92 1.411(4) . ? 
C91 C96 1.422(4) . ? 
C92 C93 1.390(4) . ? 
C92 C101 1.490(4) . ? 
C93 C94 1.389(4) . ? 
C94 C95 1.389(4) . ? 
C94 C111 1.478(5) . ? 
C95 C96 1.389(4) . ? 
C96 C121 1.492(4) . ? 
C101 C106 1.379(5) . ? 
C101 C102 1.403(5) . ? 
C102 C103 1.418(6) . ? 
C103 C104 1.363(6) . ? 
C104 C105 1.377(6) . ? 
C105 C106 1.390(5) . ? 
C111 C116 1.378(5) . ? 
C111 C112 1.398(5) . ? 
C112 C113 1.383(5) . ? 
C113 C114 1.379(5) . ? 
C114 C115 1.358(6) . ? 
C115 C116 1.380(6) . ? 
C121 C126 1.389(4) . ? 
C121 C122 1.395(4) . ? 
C122 C123 1.375(4) . ? 
C123 C124 1.361(5) . ? 
C124 C125 1.371(5) . ? 
C125 C126 1.399(5) . ? 
C131 C136 1.406(4) . ? 
C131 C132 1.426(4) . ? 
C132 C133 1.371(4) . ? 
C132 C141 1.493(4) . ? 
C133 C134 1.390(5) . ? 
C134 C135 1.401(4) . ? 
C134 C151 1.481(5) . ? 
C135 C136 1.393(4) . ? 
C136 C171 1.499(4) . ? 
C141 C146 1.385(4) . ? 
C141 C142 1.388(4) . ? 
C142 C143 1.381(5) . ? 
C143 C144 1.392(5) . ? 
C144 C145 1.378(5) . ? 
C145 C146 1.394(5) . ? 
C151 C152 1.284(8) . ? 
C151 C56* 1.379(11) . ? 
C151 C52* 1.447(12) . ? 
C151 C156 1.471(6) . ? 
C152 C153 1.392(11) . ? 
C153 C154 1.379(13) . ? 
C154 C155 1.345(12) . ? 
C155 C156 1.384(8) . ? 
C52* C53* 1.427(14) . ? 
C53* C54* 1.375(18) . ? 
C54* C55* 1.445(19) . ? 
C55* C56* 1.399(14) . ? 
C171 C176 1.382(4) . ? 
C171 C172 1.407(4) . ? 
C172 C173 1.391(5) . ? 
C173 C174 1.374(5) . ? 
C174 C175 1.382(5) . ? 
C175 C176 1.379(4) . ? 
N1S N2S 1.4094 . ? 
O1S C1S 1.3222 . ? 
O1S C4S 1.3590 . ? 
C1S C2S 1.4801 . ? 
C2S C3S 1.4689 . ? 
C3S C4S 1.4110 . ? 
O2S C7S 1.3122 . ? 
O2S C6S 1.6168 . ? 
C6S C7S 1.3701 2_556 ? 
C6S C7S 1.7366 . ? 
C7S C6S 1.3701 2_556 ? 
 
loop_ 
 _geom_angle_atom_site_label_1 
 _geom_angle_atom_site_label_2 
 _geom_angle_atom_site_label_3 
 _geom_angle 
 _geom_angle_site_symmetry_1 
 _geom_angle_site_symmetry_3 
 _geom_angle_publ_flag 
N3 Fe1 N1 86.32(11) . . ? 
N3 Fe1 N2 172.83(12) . 2_566 ? 
N1 Fe1 N2 86.78(11) . 2_566 ? 
N3 Fe1 N5 95.02(13) . . ? 
N1 Fe1 N5 176.02(13) . . ? 
N2 Fe1 N5 91.73(13) 2_566 . ? 
N3 Fe1 S2 88.87(8) . . ? 
N1 Fe1 S2 84.22(7) . . ? 
N2 Fe1 S2 88.48(8) 2_566 . ? 
N5 Fe1 S2 92.05(10) . . ? 
N3 Fe1 S1 90.95(8) . . ? 
N1 Fe1 S1 90.58(7) . . ? 
N2 Fe1 S1 91.08(8) 2_566 . ? 
N5 Fe1 S1 93.15(10) . . ? 
S2 Fe1 S1 174.79(3) . . ? 
N11 Fe2 N9 96.35(12) . . ? 
N11 Fe2 N8 86.04(12) . 2_665 ? 
N9 Fe2 N8 177.01(11) . 2_665 ? 
N11 Fe2 N7 171.27(12) . . ? 
N9 Fe2 N7 91.35(11) . . ? 
N8 Fe2 N7 86.14(11) 2_665 . ? 
N11 Fe2 S4 90.53(8) . . ? 
N9 Fe2 S4 92.81(8) . . ? 
N8 Fe2 S4 88.95(7) 2_665 . ? 
N7 Fe2 S4 93.21(7) . . ? 
N11 Fe2 S3 87.89(9) . . ? 
N9 Fe2 S3 93.45(8) . . ? 
N8 Fe2 S3 84.83(7) 2_665 . ? 
N7 Fe2 S3 87.54(7) . . ? 
S4 Fe2 S3 173.68(3) . . ? 
N2 N1 Fe1 120.32(19) . . ? 
N1 N2 Fe1 115.7(2) . 2_566 ? 
N4* N3 N4 57.6(4) . . ? 
N4* N3 Fe1 121.6(4) . . ? 
N4 N3 Fe1 115.6(3) . . ? 
N6 N5 Fe1 113.7(2) . . ? 
N8 N7 Fe2 115.19(18) . . ? 
N7 N8 Fe2 121.83(19) . 2_665 ? 
N10 N9 Fe2 115.5(2) . . ? 
N12 N11 Fe2 114.5(2) . . ? 
C11 S1 Fe1 106.15(11) . . ? 
C51 S2 Fe1 114.55(10) . . ? 
C91 S3 Fe2 111.94(10) . . ? 
C131 S4 Fe2 107.97(10) . . ? 
C12 C11 C16 117.1(3) . . ? 
C12 C11 S1 121.7(2) . . ? 
C16 C11 S1 121.0(2) . . ? 
C13 C12 C11 120.4(3) . . ? 
C13 C12 C21 117.6(3) . . ? 
C11 C12 C21 122.1(3) . . ? 
C12 C13 C14 122.9(3) . . ? 
C15 C14 C13 117.2(3) . . ? 
C15 C14 C31 121.7(3) . . ? 
C13 C14 C31 121.0(3) . . ? 
C14 C15 C16 121.7(3) . . ? 
C15 C16 C11 120.6(3) . . ? 
C15 C16 C41 117.3(3) . . ? 
C11 C16 C41 122.1(3) . . ? 
C26 C21 C22 118.8(3) . . ? 
C26 C21 C12 121.0(3) . . ? 
C22 C21 C12 120.1(3) . . ? 
C21 C22 C23 120.6(4) . . ? 
C24 C23 C22 119.9(4) . . ? 
C23 C24 C25 119.8(3) . . ? 
C24 C25 C26 120.7(4) . . ? 
C21 C26 C25 120.3(3) . . ? 
C36 C31 C32 117.7(4) . . ? 
C36 C31 C14 121.5(3) . . ? 
C32 C31 C14 120.8(4) . . ? 
C33 C32 C31 120.8(5) . . ? 
C34 C33 C32 119.2(5) . . ? 
C35 C34 C33 120.9(5) . . ? 
C34 C35 C36 119.8(5) . . ? 
C31 C36 C35 121.6(4) . . ? 
C42 C41 C46 118.3(3) . . ? 
C42 C41 C16 121.3(3) . . ? 
C46 C41 C16 120.3(3) . . ? 
C43 C42 C41 121.1(3) . . ? 
C44 C43 C42 119.7(3) . . ? 
C45 C44 C43 120.2(3) . . ? 
C44 C45 C46 119.8(3) . . ? 
C45 C46 C41 120.9(3) . . ? 
C52 C51 C56 117.5(3) . . ? 
C52 C51 S2 120.8(2) . . ? 
C56 C51 S2 121.8(2) . . ? 
C53 C52 C51 120.2(3) . . ? 
C53 C52 C61 117.1(3) . . ? 
C51 C52 C61 122.6(3) . . ? 
C52 C53 C54 122.6(3) . . ? 
C55 C54 C53 116.9(3) . . ? 
C55 C54 C71 121.4(3) . . ? 
C53 C54 C71 121.6(3) . . ? 
C54 C55 C56 122.7(3) . . ? 
C55 C56 C51 120.1(3) . . ? 
C55 C56 C81 117.2(3) . . ? 
C51 C56 C81 122.5(3) . . ? 
C66 C61 C62 118.6(3) . . ? 
C66 C61 C52 120.1(3) . . ? 
C62 C61 C52 121.3(3) . . ? 
C61 C62 C63 120.1(3) . . ? 
C64 C63 C62 120.0(3) . . ? 
C65 C64 C63 119.9(3) . . ? 
C64 C65 C66 120.3(4) . . ? 
C61 C66 C65 121.1(3) . . ? 
C72 C71 C76 116.7(4) . . ? 
C72 C71 C54 120.2(4) . . ? 
C76 C71 C54 122.9(4) . . ? 
C71 C72 C73 120.6(5) . . ? 
C74 C73 C72 121.1(5) . . ? 
C73 C74 C75 118.6(5) . . ? 
C74 C75 C76 121.3(5) . . ? 
C71 C76 C75 121.7(5) . . ? 
C86 C81 C82 117.6(3) . . ? 
C86 C81 C56 123.1(3) . . ? 
C82 C81 C56 119.2(3) . . ? 
C83 C82 C81 121.2(4) . . ? 
C84 C83 C82 120.4(4) . . ? 
C83 C84 C85 120.2(4) . . ? 
C86 C85 C84 119.1(4) . . ? 
C81 C86 C85 121.5(4) . . ? 
C92 C91 C96 117.4(3) . . ? 
C92 C91 S3 121.5(2) . . ? 
C96 C91 S3 121.1(2) . . ? 
C93 C92 C91 120.2(3) . . ? 
C93 C92 C101 118.3(3) . . ? 
C91 C92 C101 121.5(3) . . ? 
C94 C93 C92 122.7(3) . . ? 
C95 C94 C93 116.8(3) . . ? 
C95 C94 C111 120.8(3) . . ? 
C93 C94 C111 122.3(3) . . ? 
C96 C95 C94 122.6(3) . . ? 
C95 C96 C91 120.1(3) . . ? 
C95 C96 C121 117.4(3) . . ? 
C91 C96 C121 122.5(3) . . ? 
C106 C101 C102 118.9(3) . . ? 
C106 C101 C92 121.8(3) . . ? 
C102 C101 C92 119.3(3) . . ? 
C101 C102 C103 118.8(4) . . ? 
C104 C103 C102 120.9(4) . . ? 
C103 C104 C105 120.0(4) . . ? 
C104 C105 C106 119.9(4) . . ? 
C101 C106 C105 121.3(4) . . ? 
C116 C111 C112 117.4(3) . . ? 
C116 C111 C94 122.7(3) . . ? 
C112 C111 C94 119.9(3) . . ? 
C113 C112 C111 120.9(4) . . ? 
C114 C113 C112 119.9(4) . . ? 
C115 C114 C113 119.9(4) . . ? 
C114 C115 C116 120.4(4) . . ? 
C111 C116 C115 121.5(4) . . ? 
C126 C121 C122 118.1(3) . . ? 
C126 C121 C96 119.6(3) . . ? 
C122 C121 C96 122.3(3) . . ? 
C123 C122 C121 121.2(3) . . ? 
C124 C123 C122 120.1(4) . . ? 
C123 C124 C125 120.6(3) . . ? 
C124 C125 C126 119.9(4) . . ? 
C121 C126 C125 120.1(3) . . ? 
C136 C131 C132 117.4(3) . . ? 
C136 C131 S4 121.6(2) . . ? 
C132 C131 S4 121.0(2) . . ? 
C133 C132 C131 120.4(3) . . ? 
C133 C132 C141 117.1(3) . . ? 
C131 C132 C141 122.5(3) . . ? 
C132 C133 C134 122.6(3) . . ? 
C133 C134 C135 117.4(3) . . ? 
C133 C134 C151 122.0(3) . . ? 
C135 C134 C151 120.6(3) . . ? 
C136 C135 C134 121.4(3) . . ? 
C135 C136 C131 120.7(3) . . ? 
C135 C136 C171 116.6(3) . . ? 
C131 C136 C171 122.7(3) . . ? 
C146 C141 C142 118.8(3) . . ? 
C146 C141 C132 119.5(3) . . ? 
C142 C141 C132 121.5(3) . . ? 
C143 C142 C141 121.2(3) . . ? 
C142 C143 C144 119.9(3) . . ? 
C145 C144 C143 119.1(3) . . ? 
C144 C145 C146 120.9(3) . . ? 
C141 C146 C145 120.0(3) . . ? 
C152 C151 C56* 55.4(4) . . ? 
C152 C151 C52* 80.5(5) . . ? 
C56* C151 C52* 120.0(7) . . ? 
C152 C151 C156 113.5(5) . . ? 
C56* C151 C156 88.5(4) . . ? 
C52* C151 C156 72.8(4) . . ? 
C152 C151 C134 127.2(4) . . ? 
C56* C151 C134 121.1(6) . . ? 
C52* C151 C134 117.7(6) . . ? 
C156 C151 C134 119.2(4) . . ? 
C151 C152 C153 128.0(7) . . ? 
C154 C153 C152 117.3(9) . . ? 
C155 C154 C153 119.7(8) . . ? 
C154 C155 C156 120.9(6) . . ? 
C155 C156 C151 120.5(6) . . ? 
C53* C52* C151 121.6(11) . . ? 
C54* C53* C52* 113.0(14) . . ? 
C53* C54* C55* 129.3(15) . . ? 
C56* C55* C54* 113.5(13) . . ? 
C151 C56* C55* 122.4(11) . . ? 
C176 C171 C172 118.4(3) . . ? 
C176 C171 C136 121.5(3) . . ? 
C172 C171 C136 120.1(3) . . ? 
C173 C172 C171 120.3(3) . . ? 
C174 C173 C172 120.1(3) . . ? 
C173 C174 C175 119.8(3) . . ? 
C176 C175 C174 120.6(4) . . ? 
C175 C176 C171 120.9(3) . . ? 
C1S O1S C4S 105.4 . . ? 
O1S C1S C2S 108.6 . . ? 
C3S C2S C1S 104.9 . . ? 
C4S C3S C2S 100.1 . . ? 
O1S C4S C3S 111.3 . . ? 
C7S O2S C6S 71.9 . . ? 
C7S C6S O2S 120.6 2_556 . ? 
C7S C6S C7S 84.7 2_556 . ? 
O2S C6S C7S 45.9 . . ? 
O2S C7S C6S 138.5 . 2_556 ? 
O2S C7S C6S 62.2 . . ? 
C6S C7S C6S 95.3 2_556 . ? 
 
loop_ 
 _geom_torsion_atom_site_label_1 
 _geom_torsion_atom_site_label_2 
 _geom_torsion_atom_site_label_3 
 _geom_torsion_atom_site_label_4 
 _geom_torsion 
 _geom_torsion_site_symmetry_1 
 _geom_torsion_site_symmetry_2 
 _geom_torsion_site_symmetry_3 
 _geom_torsion_site_symmetry_4 
 _geom_torsion_publ_flag 
N3 Fe1 N1 N2 -120.0(2) . . . . ? 
N2 Fe1 N1 N2 61.9(3) 2_566 . . . ? 
N5 Fe1 N1 N2 130.1(16) . . . . ? 
S2 Fe1 N1 N2 150.7(2) . . . . ? 
S1 Fe1 N1 N2 -29.1(2) . . . . ? 
Fe1 N1 N2 Fe1 -77.9(3) . . . 2_566 ? 
N1 Fe1 N3 N4* -35.1(5) . . . . ? 
N2 Fe1 N3 N4* -19.2(11) 2_566 . . . ? 
N5 Fe1 N3 N4* 141.2(5) . . . . ? 
S2 Fe1 N3 N4* 49.2(5) . . . . ? 
S1 Fe1 N3 N4* -125.6(5) . . . . ? 
N1 Fe1 N3 N4 31.2(3) . . . . ? 
N2 Fe1 N3 N4 47.1(10) 2_566 . . . ? 
N5 Fe1 N3 N4 -152.6(3) . . . . ? 
S2 Fe1 N3 N4 115.5(3) . . . . ? 
S1 Fe1 N3 N4 -59.3(3) . . . . ? 
N3 Fe1 N5 N6 -15.9(3) . . . . ? 
N1 Fe1 N5 N6 93.7(17) . . . . ? 
N2 Fe1 N5 N6 161.7(3) 2_566 . . . ? 
S2 Fe1 N5 N6 73.1(3) . . . . ? 
S1 Fe1 N5 N6 -107.1(3) . . . . ? 
N11 Fe2 N7 N8 -83.0(7) . . . . ? 
N9 Fe2 N7 N8 125.1(2) . . . . ? 
N8 Fe2 N7 N8 -56.5(2) 2_665 . . . ? 
S4 Fe2 N7 N8 32.3(2) . . . . ? 
S3 Fe2 N7 N8 -141.5(2) . . . . ? 
Fe2 N7 N8 Fe2 78.2(2) . . . 2_665 ? 
N11 Fe2 N9 N10 -12.6(2) . . . . ? 
N8 Fe2 N9 N10 130.5(19) 2_665 . . . ? 
N7 Fe2 N9 N10 163.3(2) . . . . ? 
S4 Fe2 N9 N10 -103.5(2) . . . . ? 
S3 Fe2 N9 N10 75.6(2) . . . . ? 
N9 Fe2 N11 N12 -143.9(2) . . . . ? 
N8 Fe2 N11 N12 37.9(2) 2_665 . . . ? 
N7 Fe2 N11 N12 64.4(8) . . . . ? 
S4 Fe2 N11 N12 -51.0(2) . . . . ? 
S3 Fe2 N11 N12 122.9(2) . . . . ? 
N3 Fe1 S1 C11 -87.34(13) . . . . ? 
N1 Fe1 S1 C11 -173.67(12) . . . . ? 
N2 Fe1 S1 C11 99.54(13) 2_566 . . . ? 
N5 Fe1 S1 C11 7.74(14) . . . . ? 
S2 Fe1 S1 C11 -175.3(3) . . . . ? 
N3 Fe1 S2 C51 91.66(14) . . . . ? 
N1 Fe1 S2 C51 178.08(14) . . . . ? 
N2 Fe1 S2 C51 -95.01(14) 2_566 . . . ? 
N5 Fe1 S2 C51 -3.33(15) . . . . ? 
S1 Fe1 S2 C51 180(56) . . . . ? 
N11 Fe2 S3 C91 90.76(14) . . . . ? 
N9 Fe2 S3 C91 -5.49(13) . . . . ? 
N8 Fe2 S3 C91 176.97(13) 2_665 . . . ? 
N7 Fe2 S3 C91 -96.69(13) . . . . ? 
S4 Fe2 S3 C91 166.4(3) . . . . ? 
N11 Fe2 S4 C131 -89.76(14) . . . . ? 
N9 Fe2 S4 C131 6.62(13) . . . . ? 
N8 Fe2 S4 C131 -175.80(13) 2_665 . . . ? 
N7 Fe2 S4 C131 98.13(13) . . . . ? 
S3 Fe2 S4 C131 -165.3(3) . . . . ? 
Fe1 S1 C11 C12 85.8(3) . . . . ? 
Fe1 S1 C11 C16 -89.3(2) . . . . ? 
C16 C11 C12 C13 3.8(4) . . . . ? 
S1 C11 C12 C13 -171.6(2) . . . . ? 
C16 C11 C12 C21 -177.1(3) . . . . ? 
S1 C11 C12 C21 7.5(4) . . . . ? 
C11 C12 C13 C14 -1.5(5) . . . . ? 
C21 C12 C13 C14 179.4(3) . . . . ? 
C12 C13 C14 C15 -0.5(5) . . . . ? 
C12 C13 C14 C31 -179.6(3) . . . . ? 
C13 C14 C15 C16 0.2(5) . . . . ? 
C31 C14 C15 C16 179.2(3) . . . . ? 
C14 C15 C16 C11 2.2(5) . . . . ? 
C14 C15 C16 C41 -179.7(3) . . . . ? 
C12 C11 C16 C15 -4.1(4) . . . . ? 
S1 C11 C16 C15 171.2(2) . . . . ? 
C12 C11 C16 C41 177.9(3) . . . . ? 
S1 C11 C16 C41 -6.7(4) . . . . ? 
C13 C12 C21 C26 -127.8(3) . . . . ? 
C11 C12 C21 C26 53.1(4) . . . . ? 
C13 C12 C21 C22 49.4(4) . . . . ? 
C11 C12 C21 C22 -129.7(3) . . . . ? 
C26 C21 C22 C23 -0.8(5) . . . . ? 
C12 C21 C22 C23 -178.0(3) . . . . ? 
C21 C22 C23 C24 -0.1(5) . . . . ? 
C22 C23 C24 C25 1.2(5) . . . . ? 
C23 C24 C25 C26 -1.2(5) . . . . ? 
C22 C21 C26 C25 0.7(5) . . . . ? 
C12 C21 C26 C25 177.9(3) . . . . ? 
C24 C25 C26 C21 0.3(5) . . . . ? 
C15 C14 C31 C36 144.9(4) . . . . ? 
C13 C14 C31 C36 -36.2(5) . . . . ? 
C15 C14 C31 C32 -35.2(5) . . . . ? 
C13 C14 C31 C32 143.8(4) . . . . ? 
C36 C31 C32 C33 -0.4(7) . . . . ? 
C14 C31 C32 C33 179.6(4) . . . . ? 
C31 C32 C33 C34 1.3(8) . . . . ? 
C32 C33 C34 C35 -2.6(10) . . . . ? 
C33 C34 C35 C36 3.0(10) . . . . ? 
C32 C31 C36 C35 0.8(7) . . . . ? 
C14 C31 C36 C35 -179.2(5) . . . . ? 
C34 C35 C36 C31 -2.1(9) . . . . ? 
C15 C16 C41 C42 123.0(3) . . . . ? 
C11 C16 C41 C42 -59.0(4) . . . . ? 
C15 C16 C41 C46 -54.2(4) . . . . ? 
C11 C16 C41 C46 123.8(3) . . . . ? 
C46 C41 C42 C43 0.7(4) . . . . ? 
C16 C41 C42 C43 -176.6(3) . . . . ? 
C41 C42 C43 C44 -0.6(4) . . . . ? 
C42 C43 C44 C45 -0.2(5) . . . . ? 
C43 C44 C45 C46 0.9(5) . . . . ? 
C44 C45 C46 C41 -0.8(5) . . . . ? 
C42 C41 C46 C45 0.0(4) . . . . ? 
C16 C41 C46 C45 177.3(3) . . . . ? 
Fe1 S2 C51 C52 -97.8(2) . . . . ? 
Fe1 S2 C51 C56 81.3(3) . . . . ? 
C56 C51 C52 C53 -0.7(4) . . . . ? 
S2 C51 C52 C53 178.4(2) . . . . ? 
C56 C51 C52 C61 -176.3(3) . . . . ? 
S2 C51 C52 C61 2.9(4) . . . . ? 
C51 C52 C53 C54 0.6(5) . . . . ? 
C61 C52 C53 C54 176.4(3) . . . . ? 
C52 C53 C54 C55 0.1(5) . . . . ? 
C52 C53 C54 C71 -177.6(3) . . . . ? 
C53 C54 C55 C56 -0.8(5) . . . . ? 
C71 C54 C55 C56 177.0(3) . . . . ? 
C54 C55 C56 C51 0.6(5) . . . . ? 
C54 C55 C56 C81 -175.0(3) . . . . ? 
C52 C51 C56 C55 0.1(4) . . . . ? 
S2 C51 C56 C55 -179.0(2) . . . . ? 
C52 C51 C56 C81 175.5(3) . . . . ? 
S2 C51 C56 C81 -3.6(4) . . . . ? 
C53 C52 C61 C66 -56.6(4) . . . . ? 
C51 C52 C61 C66 119.1(4) . . . . ? 
C53 C52 C61 C62 121.9(3) . . . . ? 
C51 C52 C61 C62 -62.4(4) . . . . ? 
C66 C61 C62 C63 -0.5(5) . . . . ? 
C52 C61 C62 C63 -179.0(3) . . . . ? 
C61 C62 C63 C64 -0.1(6) . . . . ? 
C62 C63 C64 C65 0.1(6) . . . . ? 
C63 C64 C65 C66 0.4(6) . . . . ? 
C62 C61 C66 C65 1.0(5) . . . . ? 
C52 C61 C66 C65 179.5(3) . . . . ? 
C64 C65 C66 C61 -1.0(6) . . . . ? 
C55 C54 C71 C72 -137.6(4) . . . . ? 
C53 C54 C71 C72 40.0(5) . . . . ? 
C55 C54 C71 C76 38.3(5) . . . . ? 
C53 C54 C71 C76 -144.1(4) . . . . ? 
C76 C71 C72 C73 0.5(7) . . . . ? 
C54 C71 C72 C73 176.6(4) . . . . ? 
C71 C72 C73 C74 0.7(8) . . . . ? 
C72 C73 C74 C75 -1.9(8) . . . . ? 
C73 C74 C75 C76 2.0(8) . . . . ? 
C72 C71 C76 C75 -0.4(6) . . . . ? 
C54 C71 C76 C75 -176.4(4) . . . . ? 
C74 C75 C76 C71 -0.9(7) . . . . ? 
C55 C56 C81 C86 -127.1(3) . . . . ? 
C51 C56 C81 C86 57.4(5) . . . . ? 
C55 C56 C81 C82 50.7(4) . . . . ? 
C51 C56 C81 C82 -124.8(3) . . . . ? 
C86 C81 C82 C83 -1.3(5) . . . . ? 
C56 C81 C82 C83 -179.3(3) . . . . ? 
C81 C82 C83 C84 1.0(6) . . . . ? 
C82 C83 C84 C85 -0.4(6) . . . . ? 
C83 C84 C85 C86 0.1(6) . . . . ? 
C82 C81 C86 C85 1.1(5) . . . . ? 
C56 C81 C86 C85 178.9(3) . . . . ? 
C84 C85 C86 C81 -0.5(5) . . . . ? 
Fe2 S3 C91 C92 -93.9(2) . . . . ? 
Fe2 S3 C91 C96 84.3(2) . . . . ? 
C96 C91 C92 C93 2.4(4) . . . . ? 
S3 C91 C92 C93 -179.3(2) . . . . ? 
C96 C91 C92 C101 -175.8(3) . . . . ? 
S3 C91 C92 C101 2.4(4) . . . . ? 
C91 C92 C93 C94 0.8(5) . . . . ? 
C101 C92 C93 C94 179.0(3) . . . . ? 
C92 C93 C94 C95 -2.9(5) . . . . ? 
C92 C93 C94 C111 175.5(3) . . . . ? 
C93 C94 C95 C96 1.8(5) . . . . ? 
C111 C94 C95 C96 -176.6(3) . . . . ? 
C94 C95 C96 C91 1.3(5) . . . . ? 
C94 C95 C96 C121 -177.5(3) . . . . ? 
C92 C91 C96 C95 -3.4(4) . . . . ? 
S3 C91 C96 C95 178.3(2) . . . . ? 
C92 C91 C96 C121 175.4(3) . . . . ? 
S3 C91 C96 C121 -2.9(4) . . . . ? 
C93 C92 C101 C106 126.0(3) . . . . ? 
C91 C92 C101 C106 -55.8(4) . . . . ? 
C93 C92 C101 C102 -54.4(4) . . . . ? 
C91 C92 C101 C102 123.9(3) . . . . ? 
C106 C101 C102 C103 2.1(5) . . . . ? 
C92 C101 C102 C103 -177.6(3) . . . . ? 
C101 C102 C103 C104 0.3(6) . . . . ? 
C102 C103 C104 C105 -2.1(6) . . . . ? 
C103 C104 C105 C106 1.4(6) . . . . ? 
C102 C101 C106 C105 -2.8(5) . . . . ? 
C92 C101 C106 C105 176.8(3) . . . . ? 
C104 C105 C106 C101 1.1(5) . . . . ? 
C95 C94 C111 C116 -141.7(4) . . . . ? 
C93 C94 C111 C116 40.1(6) . . . . ? 
C95 C94 C111 C112 38.7(5) . . . . ? 
C93 C94 C111 C112 -139.6(4) . . . . ? 
C116 C111 C112 C113 1.7(6) . . . . ? 
C94 C111 C112 C113 -178.6(4) . . . . ? 
C111 C112 C113 C114 -0.4(7) . . . . ? 
C112 C113 C114 C115 -0.1(8) . . . . ? 
C113 C114 C115 C116 -0.7(9) . . . . ? 
C112 C111 C116 C115 -2.5(7) . . . . ? 
C94 C111 C116 C115 177.8(5) . . . . ? 
C114 C115 C116 C111 2.1(9) . . . . ? 
C95 C96 C121 C126 51.0(4) . . . . ? 
C91 C96 C121 C126 -127.8(3) . . . . ? 
C95 C96 C121 C122 -125.9(3) . . . . ? 
C91 C96 C121 C122 55.3(4) . . . . ? 
C126 C121 C122 C123 1.3(4) . . . . ? 
C96 C121 C122 C123 178.3(3) . . . . ? 
C121 C122 C123 C124 -0.6(5) . . . . ? 
C122 C123 C124 C125 -0.3(5) . . . . ? 
C123 C124 C125 C126 0.3(6) . . . . ? 
C122 C121 C126 C125 -1.3(4) . . . . ? 
C96 C121 C126 C125 -178.3(3) . . . . ? 
C124 C125 C126 C121 0.5(5) . . . . ? 
Fe2 S4 C131 C136 -88.5(2) . . . . ? 
Fe2 S4 C131 C132 89.2(2) . . . . ? 
C136 C131 C132 C133 2.1(4) . . . . ? 
S4 C131 C132 C133 -175.7(3) . . . . ? 
C136 C131 C132 C141 -177.7(3) . . . . ? 
S4 C131 C132 C141 4.5(4) . . . . ? 
C131 C132 C133 C134 -0.4(5) . . . . ? 
C141 C132 C133 C134 179.4(3) . . . . ? 
C132 C133 C134 C135 -0.9(5) . . . . ? 
C132 C133 C134 C151 177.9(4) . . . . ? 
C133 C134 C135 C136 0.5(5) . . . . ? 
C151 C134 C135 C136 -178.3(3) . . . . ? 
C134 C135 C136 C131 1.2(5) . . . . ? 
C134 C135 C136 C171 179.8(3) . . . . ? 
C132 C131 C136 C135 -2.5(4) . . . . ? 
S4 C131 C136 C135 175.3(2) . . . . ? 
C132 C131 C136 C171 179.1(3) . . . . ? 
S4 C131 C136 C171 -3.1(4) . . . . ? 
C133 C132 C141 C146 61.6(4) . . . . ? 
C131 C132 C141 C146 -118.6(3) . . . . ? 
C133 C132 C141 C142 -113.5(3) . . . . ? 
C131 C132 C141 C142 66.3(4) . . . . ? 
C146 C141 C142 C143 -1.3(4) . . . . ? 
C132 C141 C142 C143 173.9(3) . . . . ? 
C141 C142 C143 C144 0.9(5) . . . . ? 
C142 C143 C144 C145 0.2(5) . . . . ? 
C143 C144 C145 C146 -1.0(5) . . . . ? 
C142 C141 C146 C145 0.6(4) . . . . ? 
C132 C141 C146 C145 -174.7(3) . . . . ? 
C144 C145 C146 C141 0.6(5) . . . . ? 
C133 C134 C151 C152 -154.2(4) . . . . ? 
C135 C134 C151 C152 24.5(6) . . . . ? 
C133 C134 C151 C56* 137.7(5) . . . . ? 
C135 C134 C151 C56* -43.5(6) . . . . ? 
C133 C134 C151 C52* -54.7(5) . . . . ? 
C135 C134 C151 C52* 124.1(4) . . . . ? 
C133 C134 C151 C156 30.2(6) . . . . ? 
C135 C134 C151 C156 -151.0(4) . . . . ? 
C56* C151 C152 C153 -70.6(6) . . . . ? 
C52* C151 C152 C153 66.4(4) . . . . ? 
C156 C151 C152 C153 -0.1(3) . . . . ? 
C134 C151 C152 C153 -175.9(5) . . . . ? 
C151 C152 C153 C154 0.8(3) . . . . ? 
C152 C153 C154 C155 -2.1(7) . . . . ? 
C153 C154 C155 C156 2.8(9) . . . . ? 
C154 C155 C156 C151 -2.1(8) . . . . ? 
C152 C151 C156 C155 0.7(6) . . . . ? 
C56* C151 C156 C155 51.7(7) . . . . ? 
C52* C151 C156 C155 -70.5(7) . . . . ? 
C134 C151 C156 C155 176.9(5) . . . . ? 
C152 C151 C52* C53* -41.8(4) . . . . ? 
C56* C151 C52* C53* -1.3(3) . . . . ? 
C156 C151 C52* C53* 76.5(4) . . . . ? 
C134 C151 C52* C53* -169.0(4) . . . . ? 
C151 C52* C53* C54* -0.1(3) . . . . ? 
C52* C53* C54* C55* -0.4(7) . . . . ? 
C53* C54* C55* C56* 2.2(8) . . . . ? 
C152 C151 C56* C55* 54.3(7) . . . . ? 
C52* C151 C56* C55* 3.3(6) . . . . ? 
C156 C151 C56* C55* -65.8(6) . . . . ? 
C134 C151 C56* C55* 170.6(5) . . . . ? 
C54* C55* C56* C151 -3.5(7) . . . . ? 
C135 C136 C171 C176 119.0(3) . . . . ? 
C131 C136 C171 C176 -62.5(4) . . . . ? 
C135 C136 C171 C172 -58.7(4) . . . . ? 
C131 C136 C171 C172 119.8(3) . . . . ? 
C176 C171 C172 C173 0.7(5) . . . . ? 
C136 C171 C172 C173 178.5(3) . . . . ? 
C171 C172 C173 C174 -0.5(5) . . . . ? 
C172 C173 C174 C175 -0.1(5) . . . . ? 
C173 C174 C175 C176 0.5(5) . . . . ? 
C174 C175 C176 C171 -0.3(5) . . . . ? 
C172 C171 C176 C175 -0.3(5) . . . . ? 
C136 C171 C176 C175 -178.0(3) . . . . ? 
C4S O1S C1S C2S -19.6 . . . . ? 
O1S C1S C2S C3S 1.6 . . . . ? 
C1S C2S C3S C4S 16.1 . . . . ? 
C1S O1S C4S C3S 32.5 . . . . ? 
C2S C3S C4S O1S -30.0 . . . . ? 
C7S O2S C6S C7S -43.8 . . . 2_556 ? 
C6S O2S C7S C6S 64.0 . . . 2_556 ? 
C7S C6S C7S O2S 143.3 2_556 . . . ? 
C7S C6S C7S C6S 0.0 2_556 . . 2_556 ? 
O2S C6S C7S C6S -143.3 . . . 2_556 ? 
 
 
data_5a 
 
_audit_creation_method            SHELXL-97 
_chemical_name_systematic 
; 
'bis(N-methylphenyl-N'-phenyl-o-semidino)
2,4,6-triphenylbenzenethiolatoiron(III)'
; 
_chemical_name_common             'ortho-semidine complex (5a)' 
_chemical_melting_point           ? 
_chemical_formula_moiety           
'[(Fe 3+) (C13 H12 N2 1-)2 (C24 H17 S 1-)], (C6 H6)'
_chemical_formula_structural      'Fe(N2 C13 H12)2(S C24 H17), (C6 H6)'
_chemical_formula_sum 
 'C56 H47 Fe N4 S' 
_chemical_formula_weight          863.89 
_chemical_compound_source         'Chemical Synthesis, S.C. Lee Lab' 
 
loop_ 
 _atom_type_symbol 
 _atom_type_description 
 _atom_type_scat_dispersion_real 
 _atom_type_scat_dispersion_imag 
 _atom_type_scat_source 
 'C'  'C'   0.0033   0.0016 
 'International Tables Vol C Tables 4.2.6.8 and 6.1.1.4' 
 'H'  'H'   0.0000   0.0000 
 'International Tables Vol C Tables 4.2.6.8 and 6.1.1.4' 
 'Fe'  'Fe'   0.3463   0.8444 
 'International Tables Vol C Tables 4.2.6.8 and 6.1.1.4' 
 'N'  'N'   0.0061   0.0033 
 'International Tables Vol C Tables 4.2.6.8 and 6.1.1.4' 
 'S'  'S'   0.1246   0.1234 
 'International Tables Vol C Tables 4.2.6.8 and 6.1.1.4' 
 
_symmetry_cell_setting            monoclinic 
_symmetry_space_group_name_H-M    'P2(1)/c' 
 
loop_ 
 _symmetry_equiv_pos_as_xyz 
 'x, y, z' 
 '-x, y+1/2, -z+1/2' 
 '-x, -y, -z' 
 'x, -y-1/2, z-1/2' 
 
_cell_length_a                    11.363(2) 
_cell_length_b                    19.154(4) 
_cell_length_c                    21.950(4) 
_cell_angle_alpha                 90.00 
_cell_angle_beta                  112.67(3) 
_cell_angle_gamma                 90.00 
_cell_volume                      4408.3(15) 
_cell_formula_units_Z             4 
_cell_measurement_temperature     200(2) 
_cell_measurement_reflns_used     18063 
_cell_measurement_theta_min       1.46 
_cell_measurement_theta_max       25.01 
 
_exptl_crystal_description        'Block' 
_exptl_crystal_colour             'Dark Purple' 
_exptl_crystal_size_max           0.30 
_exptl_crystal_size_mid           0.22 
_exptl_crystal_size_min           0.11 
_exptl_crystal_density_meas       ? 
_exptl_crystal_density_diffrn     1.302 
_exptl_crystal_density_method     'not measured' 
_exptl_crystal_F_000              1812 
_exptl_absorpt_coefficient_mu     0.433 
_exptl_absorpt_correction_type    'none' 
_exptl_absorpt_correction_T_min   ? 
_exptl_absorpt_correction_T_max   ? 
_exptl_absorpt_process_details    ? 
 
_exptl_special_details 
; 
 ? 
; 
 
_diffrn_ambient_temperature       200(2) 
_diffrn_radiation_wavelength      0.71073 
_diffrn_radiation_type            MoK\a 
_diffrn_radiation_source          'fine-focus sealed tube' 
_diffrn_radiation_monochromator   graphite 
_diffrn_measurement_device_type   'Nonius KappaCCD' 
_diffrn_measurement_method        '\w scans' 
_diffrn_detector_area_resol_mean  ? 
_diffrn_standards_number          0 
_diffrn_standards_interval_count  ? 
_diffrn_standards_interval_time   ? 
_diffrn_standards_decay_%         ? 
_diffrn_reflns_number             18063 
_diffrn_reflns_av_R_equivalents   0.0400 
_diffrn_reflns_av_sigmaI/netI     0.0490 
_diffrn_reflns_limit_h_min        0 
_diffrn_reflns_limit_h_max        13 
_diffrn_reflns_limit_k_min        -22 
_diffrn_reflns_limit_k_max        0 
_diffrn_reflns_limit_l_min        -26 
_diffrn_reflns_limit_l_max        23 
_diffrn_reflns_theta_min          1.46 
_diffrn_reflns_theta_max          25.01 
_diffrn_measured_fraction_theta_max    0.999 
_diffrn_reflns_theta_full              25.01 
_diffrn_measured_fraction_theta_full   0.999 
_refine_diff_density_max    0.956 
_refine_diff_density_min   -0.574 
_refine_diff_density_rms    0.092 _reflns_number_total              7776 
_reflns_number_gt                 6184 
_reflns_threshold_expression      >2sigma(I) 
 
_computing_data_collection        'NONIUS COLLECT'
_computing_cell_refinement        'DENZO-SMN'
_computing_data_reduction         'DENZO-SMN, Platon, Siemens SHELXTL'
_computing_structure_solution     'Siemens SHELXTL'
_computing_structure_refinement   'Siemens SHELXTL'
_computing_molecular_graphics     'Siemens SHELXTL'
_computing_publication_material   'CIFTAB, Siemens SHELXTL' 
 
_refine_special_details 
; 
 Refinement of F^2^ against ALL reflections.  The weighted R-factor wR and 
 goodness of fit S are based on F^2^, conventional R-factors R are based 
 on F, with F set to zero for negative F^2^. The threshold expression of 
 F^2^ > 2sigma(F^2^) is used only for calculating R-factors(gt) etc. and is 
 not relevant to the choice of reflections for refinement.  R-factors based 
 on F^2^ are statistically about twice as large as those based on F, and R- 
 factors based on ALL data will be even larger. 
; 
 
_refine_ls_structure_factor_coef  Fsqd  
_refine_ls_matrix_type            full 
_refine_ls_weighting_scheme       calc  
_refine_ls_weighting_details 
 'calc w=1/[\s^2^(Fo^2^)+(0.0783P)^2^+4.2608P] where P=(Fo^2^+2Fc^2^)/3' 
_atom_sites_solution_primary      direct 
_atom_sites_solution_secondary    difmap 
_atom_sites_solution_hydrogens    geom 
_refine_ls_hydrogen_treatment     constr 
_refine_ls_extinction_method      none 
_refine_ls_extinction_coef        ? 
_refine_ls_number_reflns          7776 
_refine_ls_number_parameters      561 
_refine_ls_number_restraints      3 
_refine_ls_R_factor_all           0.0719 
_refine_ls_R_factor_gt            0.0530 
_refine_ls_wR_factor_ref          0.1541 
_refine_ls_wR_factor_gt           0.1385 
_refine_ls_goodness_of_fit_ref    1.038 
_refine_ls_restrained_S_all       1.040 
_refine_ls_shift/su_max           0.023 
_refine_ls_shift/su_mean          0.005 
 
loop_ 
 _atom_site_label 
 _atom_site_type_symbol 
 _atom_site_fract_x 
 _atom_site_fract_y 
 _atom_site_fract_z 
 _atom_site_U_iso_or_equiv 
 _atom_site_adp_type 
 _atom_site_occupancy 
 _atom_site_symmetry_multiplicity 
 _atom_site_calc_flag 
 _atom_site_refinement_flags 
 _atom_site_disorder_assembly 
 _atom_site_disorder_group 
Fe1 Fe 0.31396(4) 0.12223(2) 0.38717(2) 0.02966(14) Uani 1 1 d . . . 
N1 N 0.4231(2) 0.18582(12) 0.44963(12) 0.0315(5) Uani 1 1 d . . . 
N2 N 0.2100(2) 0.05440(13) 0.32728(12) 0.0324(5) Uani 1 1 d . . . 
N3 N 0.4711(2) 0.07191(12) 0.40847(12) 0.0315(5) Uani 1 1 d . . . 
N4 N 0.1853(2) 0.11353(12) 0.42353(12) 0.0317(5) Uani 1 1 d . . . 
S1 S 0.24992(7) 0.19606(4) 0.29960(4) 0.0366(2) Uani 1 1 d . . . 
C1S C 0.8360(5) 0.0924(3) 0.0298(3) 0.0928(16) Uani 1 1 d D . . 
H1SA H 0.8153 0.0792 -0.0149 0.111 Uiso 1 1 calc R . . 
C2S C 0.9524(6) 0.1024(4) 0.0690(3) 0.117(2) Uani 1 1 d D . . 
H2SA H 1.0198 0.0927 0.0547 0.140 Uiso 1 1 calc R . . 
C3S C 0.7433(6) 0.1010(3) 0.0537(3) 0.0955(17) Uani 1 1 d D . . 
H3SA H 0.6570 0.0923 0.0257 0.115 Uiso 1 1 calc R . . 
C4S C 0.8877(6) 0.1396(3) 0.1612(3) 0.0952(17) Uani 1 1 d D . . 
H4SA H 0.9044 0.1572 0.2042 0.114 Uiso 1 1 calc R . . 
C5S C 0.9808(7) 0.1289(3) 0.1357(4) 0.118(2) Uani 1 1 d D . . 
H5SA H 1.0669 0.1393 0.1628 0.142 Uiso 1 1 calc R . . 
C6S C 0.7719(8) 0.1221(4) 0.1179(4) 0.133(3) Uani 1 1 d D . . 
H6SA H 0.7035 0.1245 0.1326 0.159 Uiso 1 1 calc R . . 
C11 C 0.3318(3) 0.27709(15) 0.31772(14) 0.0327(7) Uani 1 1 d . . . 
C12 C 0.2699(3) 0.33783(16) 0.32783(15) 0.0351(7) Uani 1 1 d . . . 
C13 C 0.3374(3) 0.40031(16) 0.34649(15) 0.0359(7) Uani 1 1 d . . . 
H13A H 0.2941 0.4408 0.3520 0.043 Uiso 1 1 calc R . . 
C14 C 0.4664(3) 0.40536(16) 0.35738(14) 0.0335(7) Uani 1 1 d . . . 
C15 C 0.5246(3) 0.34629(15) 0.34523(14) 0.0329(7) Uani 1 1 d . . . 
H15A H 0.6119 0.3489 0.3513 0.039 Uiso 1 1 calc R . . 
C16 C 0.4603(3) 0.28313(15) 0.32451(14) 0.0314(6) Uani 1 1 d . . . 
C21 C 0.5483(3) 0.17030(16) 0.47314(14) 0.0332(7) Uani 1 1 d . . . 
C22 C 0.5760(3) 0.10464(16) 0.45081(14) 0.0324(7) Uani 1 1 d . . . 
C23 C 0.7036(3) 0.07919(18) 0.47593(16) 0.0400(7) Uani 1 1 d . . . 
H26A H 0.7227 0.0349 0.4626 0.048 Uiso 1 1 calc R . . 
C24 C 0.7986(3) 0.11943(19) 0.51963(17) 0.0471(9) Uani 1 1 d . . . 
H24A H 0.8838 0.1025 0.5366 0.057 Uiso 1 1 calc R . . 
C25 C 0.7720(3) 0.1855(2) 0.53985(18) 0.0482(9) Uani 1 1 d . . . 
H25A H 0.8399 0.2127 0.5694 0.058 Uiso 1 1 calc R . . 
C26 C 0.6502(3) 0.21099(18) 0.51764(16) 0.0409(8) Uani 1 1 d . . . 
H26B H 0.6337 0.2555 0.5318 0.049 Uiso 1 1 calc R . . 
C27 C 0.3868(3) 0.25201(15) 0.47068(16) 0.0374(7) Uani 1 1 d . . . 
H27A H 0.4087 0.2509 0.5184 0.056 Uiso 1 1 calc R . . 
H27B H 0.2947 0.2591 0.4477 0.056 Uiso 1 1 calc R . . 
H27C H 0.4325 0.2904 0.4600 0.056 Uiso 1 1 calc R . . 
C31 C 0.1066(3) 0.03275(15) 0.33797(15) 0.0340(7) Uani 1 1 d . . . 
C32 C 0.0944(3) 0.06530(15) 0.39358(15) 0.0317(6) Uani 1 1 d . . . 
C33 C -0.0067(3) 0.04457(16) 0.41289(16) 0.0382(7) Uani 1 1 d . . . 
H33A H -0.0153 0.0649 0.4504 0.046 Uiso 1 1 calc R . . 
C34 C -0.0910(3) -0.00505(17) 0.37661(18) 0.0443(8) Uani 1 1 d . . . 
H34A H -0.1583 -0.0191 0.3895 0.053 Uiso 1 1 calc R . . 
C35 C -0.0806(3) -0.03577(18) 0.32068(19) 0.0480(8) Uani 1 1 d . . . 
H35A H -0.1413 -0.0698 0.2962 0.058 Uiso 1 1 calc R . . 
C36 C 0.0154(3) -0.01743(17) 0.30100(17) 0.0410(7) Uani 1 1 d . . . 
H36A H 0.0211 -0.0381 0.2629 0.049 Uiso 1 1 calc R . . 
C37 C 0.2266(3) 0.02899(17) 0.26833(15) 0.0383(7) Uani 1 1 d . . . 
H37A H 0.2408 -0.0216 0.2718 0.057 Uiso 1 1 calc R . . 
H37B H 0.3003 0.0521 0.2644 0.057 Uiso 1 1 calc R . . 
H37C H 0.1499 0.0394 0.2292 0.057 Uiso 1 1 calc R . . 
C41 C 0.4840(3) 0.00583(15) 0.38155(15) 0.0324(6) Uani 1 1 d . . . 
C42 C 0.4243(3) -0.05270(16) 0.39374(15) 0.0365(7) Uani 1 1 d . . . 
H42A H 0.3831 -0.0501 0.4240 0.044 Uiso 1 1 calc R . . 
C43 C 0.4250(3) -0.11509(17) 0.36145(17) 0.0439(8) Uani 1 1 d . . . 
H43A H 0.3833 -0.1550 0.3693 0.053 Uiso 1 1 calc R . . 
C44 C 0.4864(3) -0.11934(18) 0.31776(17) 0.0454(8) Uani 1 1 d . . . 
H44A H 0.4857 -0.1618 0.2953 0.054 Uiso 1 1 calc R . . 
C45 C 0.5483(3) -0.06170(18) 0.30719(16) 0.0415(8) Uani 1 1 d . . . 
H45A H 0.5918 -0.0649 0.2780 0.050 Uiso 1 1 calc R . . 
C46 C 0.5478(3) 0.00091(17) 0.33869(15) 0.0370(7) Uani 1 1 d . . . 
H46A H 0.5908 0.0404 0.3311 0.044 Uiso 1 1 calc R . . 
C51 C 0.1667(3) 0.15420(15) 0.47367(15) 0.0319(6) Uani 1 1 d . . . 
C52 C 0.2370(3) 0.14228(17) 0.54022(16) 0.0388(7) Uani 1 1 d . . . 
H52A H 0.3008 0.1071 0.5534 0.047 Uiso 1 1 calc R . . 
C53 C 0.2142(3) 0.18171(18) 0.58750(17) 0.0468(8) Uani 1 1 d . . . 
H53A H 0.2619 0.1731 0.6330 0.056 Uiso 1 1 calc R . . 
C54 C 0.1224(3) 0.23347(19) 0.56867(18) 0.0487(9) Uani 1 1 d . . . 
H54A H 0.1066 0.2601 0.6012 0.058 Uiso 1 1 calc R . . 
C55 C 0.0536(3) 0.24640(18) 0.50253(18) 0.0470(8) Uani 1 1 d . . . 
H55A H -0.0093 0.2821 0.4896 0.056 Uiso 1 1 calc R . . 
C56 C 0.0759(3) 0.20763(17) 0.45501(17) 0.0392(7) Uani 1 1 d . . . 
H56A H 0.0295 0.2173 0.4096 0.047 Uiso 1 1 calc R . . 
C121 C 0.1326(3) 0.33856(17) 0.32046(18) 0.0435(8) Uani 1 1 d . . . 
C122 C 0.1002(4) 0.3712(2) 0.3681(2) 0.0597(11) Uani 1 1 d . . . 
H12E H 0.1647 0.3914 0.4058 0.072 Uiso 1 1 calc R . . 
C123 C -0.0283(5) 0.3744(3) 0.3609(3) 0.0777(15) Uani 1 1 d . . . 
H12D H -0.0503 0.3969 0.3936 0.093 Uiso 1 1 calc R . . 
C124 C -0.1213(4) 0.3454(3) 0.3071(3) 0.0862(18) Uani 1 1 d . . . 
H12B H -0.2077 0.3472 0.3028 0.103 Uiso 1 1 calc R . . 
C125 C -0.0904(4) 0.3134(2) 0.2589(3) 0.0760(15) Uani 1 1 d . . . 
H12A H -0.1556 0.2934 0.2214 0.091 Uiso 1 1 calc R . . 
C126 C 0.0361(3) 0.31049(18) 0.2650(2) 0.0550(10) Uani 1 1 d . . . 
H12C H 0.0567 0.2893 0.2313 0.066 Uiso 1 1 calc R . . 
C141 C 0.5397(3) 0.47155(16) 0.37995(15) 0.0367(7) Uani 1 1 d . . . 
C142 C 0.5159(3) 0.51492(17) 0.42425(17) 0.0462(8) Uani 1 1 d . . . 
H14E H 0.4488 0.5038 0.4383 0.055 Uiso 1 1 calc R . . 
C143 C 0.5888(4) 0.57480(19) 0.44870(19) 0.0552(10) Uani 1 1 d . . . 
H14D H 0.5717 0.6035 0.4796 0.066 Uiso 1 1 calc R . . 
C144 C 0.6848(4) 0.5925(2) 0.42857(19) 0.0555(10) Uani 1 1 d . . . 
H14B H 0.7349 0.6330 0.4456 0.067 Uiso 1 1 calc R . . 
C145 C 0.7079(4) 0.5506(2) 0.38309(19) 0.0538(9) Uani 1 1 d . . . 
H14C H 0.7732 0.5630 0.3681 0.065 Uiso 1 1 calc R . . 
C146 C 0.6370(3) 0.49076(18) 0.35918(17) 0.0430(8) Uani 1 1 d . . . 
H14A H 0.6546 0.4623 0.3282 0.052 Uiso 1 1 calc R . . 
C161 C 0.5346(3) 0.22650(15) 0.30840(15) 0.0340(7) Uani 1 1 d . . . 
C162 C 0.6587(3) 0.21186(16) 0.35167(16) 0.0369(7) Uani 1 1 d . . . 
H16E H 0.6918 0.2334 0.3939 0.044 Uiso 1 1 calc R . . 
C163 C 0.7348(3) 0.16622(18) 0.33392(19) 0.0474(8) Uani 1 1 d . . . 
H16C H 0.8190 0.1564 0.3642 0.057 Uiso 1 1 calc R . . 
C164 C 0.6888(4) 0.13494(18) 0.2724(2) 0.0508(9) Uani 1 1 d . . . 
H16B H 0.7416 0.1043 0.2601 0.061 Uiso 1 1 calc R . . 
C165 C 0.5658(4) 0.14843(18) 0.22909(19) 0.0499(9) Uani 1 1 d . . . 
H16A H 0.5335 0.1269 0.1869 0.060 Uiso 1 1 calc R . . 
C166 C 0.4883(3) 0.19375(17) 0.24711(16) 0.0405(7) Uani 1 1 d . . . 
H16D H 0.4033 0.2023 0.2172 0.049 Uiso 1 1 calc R . . 
 
loop_ 
 _atom_site_aniso_label 
 _atom_site_aniso_U_11 
 _atom_site_aniso_U_22 
 _atom_site_aniso_U_33 
 _atom_site_aniso_U_23 
 _atom_site_aniso_U_13 
 _atom_site_aniso_U_12 
Fe1 0.0294(2) 0.0261(2) 0.0353(3) -0.00240(17) 0.01439(18) -0.00198(16) 
N1 0.0343(13) 0.0273(13) 0.0355(13) -0.0017(10) 0.0163(11) -0.0019(10) 
N2 0.0321(12) 0.0293(13) 0.0356(13) 0.0007(11) 0.0128(11) 0.0002(10) 
N3 0.0330(12) 0.0298(13) 0.0340(13) -0.0013(10) 0.0154(11) -0.0011(10) 
N4 0.0317(12) 0.0290(13) 0.0362(14) -0.0018(11) 0.0150(11) -0.0005(10) 
S1 0.0342(4) 0.0311(4) 0.0409(4) 0.0028(3) 0.0104(3) -0.0032(3) 
C1S 0.076(3) 0.114(5) 0.080(3) -0.005(3) 0.020(3) -0.011(3) 
C2S 0.075(4) 0.170(7) 0.100(5) 0.032(5) 0.028(3) 0.022(4) 
C3S 0.095(4) 0.109(4) 0.090(4) -0.015(3) 0.044(3) -0.031(3) 
C4S 0.082(4) 0.101(4) 0.109(5) 0.021(3) 0.043(4) -0.004(3) 
C5S 0.103(5) 0.104(5) 0.110(5) 0.037(4) -0.001(4) -0.016(4) 
C6S 0.135(6) 0.173(7) 0.117(5) -0.039(5) 0.078(5) -0.067(5) 
C11 0.0337(15) 0.0292(16) 0.0332(16) 0.0040(12) 0.0109(13) 0.0005(12) 
C12 0.0338(15) 0.0315(17) 0.0404(17) 0.0063(14) 0.0147(13) 0.0019(13) 
C13 0.0436(17) 0.0302(16) 0.0369(17) 0.0045(13) 0.0189(14) 0.0078(14) 
C14 0.0408(16) 0.0298(16) 0.0313(15) 0.0008(13) 0.0155(13) -0.0019(13) 
C15 0.0331(15) 0.0315(17) 0.0348(16) 0.0009(13) 0.0139(13) 0.0001(13) 
C16 0.0354(15) 0.0292(16) 0.0299(15) 0.0011(12) 0.0131(12) 0.0010(12) 
C21 0.0338(15) 0.0339(17) 0.0337(16) -0.0010(13) 0.0150(13) -0.0039(13) 
C22 0.0311(15) 0.0352(17) 0.0334(16) 0.0003(13) 0.0154(13) -0.0010(12) 
C23 0.0358(16) 0.047(2) 0.0388(17) -0.0015(15) 0.0158(14) 0.0033(14) 
C24 0.0330(16) 0.064(2) 0.0434(19) -0.0025(17) 0.0140(15) 0.0015(15) 
C25 0.0372(17) 0.058(2) 0.048(2) -0.0117(17) 0.0152(15) -0.0089(16) 
C26 0.0410(17) 0.0412(19) 0.0425(18) -0.0074(15) 0.0182(15) -0.0079(14) 
C27 0.0441(17) 0.0270(16) 0.0455(18) -0.0038(14) 0.0219(15) -0.0014(13) 
C31 0.0308(15) 0.0283(16) 0.0427(17) 0.0003(13) 0.0137(13) 0.0011(12) 
C32 0.0301(14) 0.0264(15) 0.0385(16) 0.0013(13) 0.0131(13) 0.0026(12) 
C33 0.0333(15) 0.0352(17) 0.0495(19) 0.0005(15) 0.0199(14) 0.0011(13) 
C34 0.0347(16) 0.0393(19) 0.063(2) -0.0023(16) 0.0232(16) -0.0052(14) 
C35 0.0371(17) 0.043(2) 0.062(2) -0.0104(17) 0.0171(16) -0.0090(15) 
C36 0.0372(16) 0.0379(18) 0.0479(19) -0.0062(15) 0.0162(15) -0.0044(14) 
C37 0.0362(16) 0.0397(18) 0.0391(17) -0.0051(14) 0.0146(14) -0.0008(13) 
C41 0.0335(15) 0.0292(16) 0.0341(16) -0.0008(13) 0.0128(13) 0.0015(12) 
C42 0.0405(16) 0.0333(17) 0.0375(17) 0.0042(14) 0.0171(14) 0.0015(13) 
C43 0.0479(19) 0.0332(18) 0.047(2) 0.0025(15) 0.0144(16) -0.0015(14) 
C44 0.0503(19) 0.0373(19) 0.0420(19) -0.0057(15) 0.0106(16) 0.0058(15) 
C45 0.0402(17) 0.051(2) 0.0348(17) -0.0046(15) 0.0156(14) 0.0093(15) 
C46 0.0371(16) 0.0383(18) 0.0375(17) 0.0007(14) 0.0166(14) -0.0011(13) 
C51 0.0298(14) 0.0281(16) 0.0421(17) -0.0031(13) 0.0188(13) -0.0033(12) 
C52 0.0385(16) 0.0349(17) 0.0440(18) -0.0008(14) 0.0171(14) 0.0039(14) 
C53 0.0513(19) 0.049(2) 0.0425(19) -0.0020(16) 0.0202(16) 0.0034(16) 
C54 0.051(2) 0.050(2) 0.054(2) -0.0138(17) 0.0306(18) -0.0003(16) 
C55 0.0417(18) 0.0393(19) 0.064(2) -0.0079(17) 0.0244(17) 0.0069(15) 
C56 0.0369(16) 0.0376(18) 0.0448(19) 0.0017(15) 0.0177(14) 0.0046(14) 
C121 0.0374(17) 0.0331(18) 0.064(2) 0.0158(16) 0.0237(16) 0.0085(14) 
C122 0.056(2) 0.059(3) 0.078(3) 0.020(2) 0.042(2) 0.0211(19) 
C123 0.071(3) 0.079(3) 0.107(4) 0.042(3) 0.060(3) 0.035(3) 
C124 0.045(2) 0.069(3) 0.157(5) 0.051(3) 0.053(3) 0.019(2) 
C125 0.035(2) 0.046(2) 0.136(4) 0.021(3) 0.022(2) 0.0042(17) 
C126 0.0376(18) 0.0341(19) 0.088(3) 0.0125(19) 0.0184(19) 0.0034(15) 
C141 0.0462(17) 0.0298(16) 0.0333(16) 0.0017(13) 0.0143(14) 0.0015(13) 
C142 0.061(2) 0.0359(19) 0.049(2) -0.0018(15) 0.0286(17) -0.0049(16) 
C143 0.081(3) 0.039(2) 0.051(2) -0.0136(17) 0.030(2) -0.0063(18) 
C144 0.069(2) 0.042(2) 0.055(2) -0.0106(18) 0.0229(19) -0.0210(18) 
C145 0.055(2) 0.051(2) 0.058(2) -0.0083(18) 0.0251(18) -0.0168(18) 
C146 0.0468(18) 0.0405(19) 0.0438(19) -0.0067(15) 0.0199(15) -0.0062(15) 
C161 0.0365(16) 0.0277(16) 0.0425(17) 0.0035(13) 0.0204(14) -0.0025(12) 
C162 0.0371(16) 0.0326(17) 0.0440(18) 0.0006(14) 0.0189(14) -0.0011(13) 
C163 0.0388(17) 0.042(2) 0.067(2) 0.0072(18) 0.0267(17) 0.0045(15) 
C164 0.059(2) 0.039(2) 0.073(3) 0.0012(18) 0.046(2) 0.0025(16) 
C165 0.068(2) 0.0398(19) 0.053(2) -0.0086(17) 0.0348(19) -0.0034(17) 
C166 0.0450(17) 0.0351(18) 0.0422(18) -0.0024(14) 0.0177(15) -0.0014(14) 
 
_geom_special_details 
; 
 All esds (except the esd in the dihedral angle between two l.s. planes) 
 are estimated using the full covariance matrix.  The cell esds are taken 
 into account individually in the estimation of esds in distances, angles 
 and torsion angles; correlations between esds in cell parameters are only 
 used when they are defined by crystal symmetry.  An approximate (isotropic) 
 treatment of cell esds is used for estimating esds involving l.s. planes. 
; 
 
loop_ 
 _geom_bond_atom_site_label_1 
 _geom_bond_atom_site_label_2 
 _geom_bond_distance 
 _geom_bond_site_symmetry_2 
 _geom_bond_publ_flag 
Fe1 N1 1.895(2) . ? 
Fe1 N2 1.901(2) . ? 
Fe1 N3 1.922(2) . ? 
Fe1 N4 1.924(2) . ? 
Fe1 S1 2.2684(10) . ? 
N1 C21 1.346(4) . ? 
N1 C27 1.463(4) . ? 
N2 C31 1.349(4) . ? 
N2 C37 1.461(4) . ? 
N3 C22 1.350(4) . ? 
N3 C41 1.428(4) . ? 
N4 C32 1.352(4) . ? 
N4 C51 1.429(4) . ? 
S1 C11 1.774(3) . ? 
C1S C2S 1.285(8) . ? 
C1S C3S 1.356(7) . ? 
C2S C5S 1.463(9) . ? 
C3S C6S 1.380(8) . ? 
C4S C6S 1.335(9) . ? 
C4S C5S 1.389(9) . ? 
C11 C16 1.414(4) . ? 
C11 C12 1.421(4) . ? 
C12 C13 1.395(4) . ? 
C12 C121 1.505(4) . ? 
C13 C14 1.395(4) . ? 
C14 C15 1.387(4) . ? 
C14 C141 1.492(4) . ? 
C15 C16 1.396(4) . ? 
C16 C161 1.498(4) . ? 
C21 C26 1.425(4) . ? 
C21 C22 1.428(4) . ? 
C22 C23 1.424(4) . ? 
C23 C24 1.371(5) . ? 
C24 C25 1.412(5) . ? 
C25 C26 1.368(5) . ? 
C31 C36 1.417(4) . ? 
C31 C32 1.425(4) . ? 
C32 C33 1.425(4) . ? 
C33 C34 1.367(4) . ? 
C34 C35 1.407(5) . ? 
C35 C36 1.365(5) . ? 
C41 C42 1.389(4) . ? 
C41 C46 1.395(4) . ? 
C42 C43 1.391(5) . ? 
C43 C44 1.389(5) . ? 
C44 C45 1.376(5) . ? 
C45 C46 1.385(5) . ? 
C51 C52 1.387(4) . ? 
C51 C56 1.398(4) . ? 
C52 C53 1.386(5) . ? 
C53 C54 1.382(5) . ? 
C54 C55 1.380(5) . ? 
C55 C56 1.381(5) . ? 
C121 C122 1.385(5) . ? 
C121 C126 1.395(5) . ? 
C122 C123 1.408(6) . ? 
C123 C124 1.363(8) . ? 
C124 C125 1.380(8) . ? 
C125 C126 1.392(5) . ? 
C141 C142 1.382(4) . ? 
C141 C146 1.398(4) . ? 
C142 C143 1.396(5) . ? 
C143 C144 1.368(5) . ? 
C144 C145 1.383(5) . ? 
C145 C146 1.383(5) . ? 
C161 C166 1.391(4) . ? 
C161 C162 1.392(4) . ? 
C162 C163 1.387(4) . ? 
C163 C164 1.383(5) . ? 
C164 C165 1.378(5) . ? 
C165 C166 1.397(5) . ? 
 
loop_ 
 _geom_angle_atom_site_label_1 
 _geom_angle_atom_site_label_2 
 _geom_angle_atom_site_label_3 
 _geom_angle 
 _geom_angle_site_symmetry_1 
 _geom_angle_site_symmetry_3 
 _geom_angle_publ_flag 
N1 Fe1 N2 176.88(10) . . ? 
N1 Fe1 N3 81.87(10) . . ? 
N2 Fe1 N3 95.56(10) . . ? 
N1 Fe1 N4 98.38(10) . . ? 
N2 Fe1 N4 81.87(10) . . ? 
N3 Fe1 N4 129.73(10) . . ? 
N1 Fe1 S1 96.84(8) . . ? 
N2 Fe1 S1 85.94(8) . . ? 
N3 Fe1 S1 118.90(8) . . ? 
N4 Fe1 S1 111.02(8) . . ? 
C21 N1 C27 117.1(2) . . ? 
C21 N1 Fe1 115.8(2) . . ? 
C27 N1 Fe1 126.86(19) . . ? 
C31 N2 C37 118.0(2) . . ? 
C31 N2 Fe1 116.1(2) . . ? 
C37 N2 Fe1 125.60(19) . . ? 
C22 N3 C41 119.5(2) . . ? 
C22 N3 Fe1 115.18(19) . . ? 
C41 N3 Fe1 125.29(19) . . ? 
C32 N4 C51 115.8(2) . . ? 
C32 N4 Fe1 114.68(19) . . ? 
C51 N4 Fe1 129.32(19) . . ? 
C11 S1 Fe1 112.71(10) . . ? 
C2S C1S C3S 118.5(6) . . ? 
C1S C2S C5S 119.6(6) . . ? 
C1S C3S C6S 121.3(6) . . ? 
C6S C4S C5S 111.8(6) . . ? 
C4S C5S C2S 123.1(6) . . ? 
C4S C6S C3S 125.4(6) . . ? 
C16 C11 C12 118.0(3) . . ? 
C16 C11 S1 121.8(2) . . ? 
C12 C11 S1 120.2(2) . . ? 
C13 C12 C11 119.9(3) . . ? 
C13 C12 C121 117.0(3) . . ? 
C11 C12 C121 123.1(3) . . ? 
C14 C13 C12 122.2(3) . . ? 
C15 C14 C13 117.2(3) . . ? 
C15 C14 C141 120.7(3) . . ? 
C13 C14 C141 122.0(3) . . ? 
C14 C15 C16 122.8(3) . . ? 
C15 C16 C11 119.6(3) . . ? 
C15 C16 C161 115.7(2) . . ? 
C11 C16 C161 124.6(3) . . ? 
N1 C21 C26 127.0(3) . . ? 
N1 C21 C22 113.8(3) . . ? 
C26 C21 C22 119.2(3) . . ? 
N3 C22 C23 127.2(3) . . ? 
N3 C22 C21 113.1(2) . . ? 
C23 C22 C21 119.7(3) . . ? 
C24 C23 C22 119.2(3) . . ? 
C23 C24 C25 121.2(3) . . ? 
C26 C25 C24 121.2(3) . . ? 
C25 C26 C21 119.5(3) . . ? 
N2 C31 C36 127.1(3) . . ? 
N2 C31 C32 113.2(3) . . ? 
C36 C31 C32 119.7(3) . . ? 
N4 C32 C31 114.0(2) . . ? 
N4 C32 C33 126.7(3) . . ? 
C31 C32 C33 119.3(3) . . ? 
C34 C33 C32 119.0(3) . . ? 
C33 C34 C35 121.6(3) . . ? 
C36 C35 C34 121.0(3) . . ? 
C35 C36 C31 119.4(3) . . ? 
C42 C41 C46 119.7(3) . . ? 
C42 C41 N3 120.0(3) . . ? 
C46 C41 N3 120.1(3) . . ? 
C41 C42 C43 119.7(3) . . ? 
C44 C43 C42 120.4(3) . . ? 
C45 C44 C43 119.7(3) . . ? 
C44 C45 C46 120.7(3) . . ? 
C45 C46 C41 119.9(3) . . ? 
C52 C51 C56 119.3(3) . . ? 
C52 C51 N4 121.7(3) . . ? 
C56 C51 N4 119.0(3) . . ? 
C53 C52 C51 120.1(3) . . ? 
C54 C53 C52 120.3(3) . . ? 
C55 C54 C53 120.0(3) . . ? 
C54 C55 C56 120.3(3) . . ? 
C55 C56 C51 120.1(3) . . ? 
C122 C121 C126 119.0(3) . . ? 
C122 C121 C12 119.3(3) . . ? 
C126 C121 C12 121.6(3) . . ? 
C121 C122 C123 120.0(5) . . ? 
C124 C123 C122 120.3(5) . . ? 
C123 C124 C125 120.2(4) . . ? 
C124 C125 C126 120.2(5) . . ? 
C125 C126 C121 120.3(4) . . ? 
C142 C141 C146 117.7(3) . . ? 
C142 C141 C14 120.6(3) . . ? 
C146 C141 C14 121.7(3) . . ? 
C141 C142 C143 121.1(3) . . ? 
C144 C143 C142 120.6(3) . . ? 
C143 C144 C145 119.1(3) . . ? 
C144 C145 C146 120.7(3) . . ? 
C145 C146 C141 120.9(3) . . ? 
C166 C161 C162 118.3(3) . . ? 
C166 C161 C16 121.2(3) . . ? 
C162 C161 C16 120.0(3) . . ? 
C163 C162 C161 120.9(3) . . ? 
C164 C163 C162 120.4(3) . . ? 
C165 C164 C163 119.6(3) . . ? 
C164 C165 C166 120.2(3) . . ? 
C161 C166 C165 120.6(3) . . ? 
 
loop_ 
 _geom_torsion_atom_site_label_1 
 _geom_torsion_atom_site_label_2 
 _geom_torsion_atom_site_label_3 
 _geom_torsion_atom_site_label_4 
 _geom_torsion 
 _geom_torsion_site_symmetry_1 
 _geom_torsion_site_symmetry_2 
 _geom_torsion_site_symmetry_3 
 _geom_torsion_site_symmetry_4 
 _geom_torsion_publ_flag 
N2 Fe1 N1 C21 39(2) . . . . ? 
N3 Fe1 N1 C21 4.8(2) . . . . ? 
N4 Fe1 N1 C21 133.9(2) . . . . ? 
S1 Fe1 N1 C21 -113.6(2) . . . . ? 
N2 Fe1 N1 C27 -145.7(18) . . . . ? 
N3 Fe1 N1 C27 179.6(3) . . . . ? 
N4 Fe1 N1 C27 -51.2(2) . . . . ? 
S1 Fe1 N1 C27 61.3(2) . . . . ? 
N1 Fe1 N2 C31 93.6(19) . . . . ? 
N3 Fe1 N2 C31 128.0(2) . . . . ? 
N4 Fe1 N2 C31 -1.4(2) . . . . ? 
S1 Fe1 N2 C31 -113.3(2) . . . . ? 
N1 Fe1 N2 C37 -92.1(19) . . . . ? 
N3 Fe1 N2 C37 -57.6(2) . . . . ? 
N4 Fe1 N2 C37 173.0(2) . . . . ? 
S1 Fe1 N2 C37 61.0(2) . . . . ? 
N1 Fe1 N3 C22 -3.5(2) . . . . ? 
N2 Fe1 N3 C22 178.3(2) . . . . ? 
N4 Fe1 N3 C22 -97.7(2) . . . . ? 
S1 Fe1 N3 C22 89.9(2) . . . . ? 
N1 Fe1 N3 C41 178.8(2) . . . . ? 
N2 Fe1 N3 C41 0.6(2) . . . . ? 
N4 Fe1 N3 C41 84.6(3) . . . . ? 
S1 Fe1 N3 C41 -87.9(2) . . . . ? 
N1 Fe1 N4 C32 -174.1(2) . . . . ? 
N2 Fe1 N4 C32 2.7(2) . . . . ? 
N3 Fe1 N4 C32 -87.8(2) . . . . ? 
S1 Fe1 N4 C32 85.2(2) . . . . ? 
N1 Fe1 N4 C51 11.4(3) . . . . ? 
N2 Fe1 N4 C51 -171.7(3) . . . . ? 
N3 Fe1 N4 C51 97.8(3) . . . . ? 
S1 Fe1 N4 C51 -89.3(2) . . . . ? 
N1 Fe1 S1 C11 5.92(13) . . . . ? 
N2 Fe1 S1 C11 -172.66(13) . . . . ? 
N3 Fe1 S1 C11 -78.54(14) . . . . ? 
N4 Fe1 S1 C11 107.65(13) . . . . ? 
C3S C1S C2S C5S -5.7(7) . . . . ? 
C2S C1S C3S C6S 2.0(7) . . . . ? 
C6S C4S C5S C2S 0.7(9) . . . . ? 
C1S C2S C5S C4S 4.6(9) . . . . ? 
C5S C4S C6S C3S -4.7(11) . . . . ? 
C1S C3S C6S C4S 3.7(11) . . . . ? 
Fe1 S1 C11 C16 73.5(3) . . . . ? 
Fe1 S1 C11 C12 -104.6(2) . . . . ? 
C16 C11 C12 C13 -2.5(4) . . . . ? 
S1 C11 C12 C13 175.6(2) . . . . ? 
C16 C11 C12 C121 178.5(3) . . . . ? 
S1 C11 C12 C121 -3.3(4) . . . . ? 
C11 C12 C13 C14 -1.6(5) . . . . ? 
C121 C12 C13 C14 177.4(3) . . . . ? 
C12 C13 C14 C15 3.6(4) . . . . ? 
C12 C13 C14 C141 -177.5(3) . . . . ? 
C13 C14 C15 C16 -1.5(4) . . . . ? 
C141 C14 C15 C16 179.5(3) . . . . ? 
C14 C15 C16 C11 -2.5(4) . . . . ? 
C14 C15 C16 C161 175.2(3) . . . . ? 
C12 C11 C16 C15 4.5(4) . . . . ? 
S1 C11 C16 C15 -173.6(2) . . . . ? 
C12 C11 C16 C161 -173.0(3) . . . . ? 
S1 C11 C16 C161 8.9(4) . . . . ? 
C27 N1 C21 C26 1.2(4) . . . . ? 
Fe1 N1 C21 C26 176.6(2) . . . . ? 
C27 N1 C21 C22 179.5(2) . . . . ? 
Fe1 N1 C21 C22 -5.1(3) . . . . ? 
C41 N3 C22 C23 -3.4(5) . . . . ? 
Fe1 N3 C22 C23 178.7(2) . . . . ? 
C41 N3 C22 C21 179.6(2) . . . . ? 
Fe1 N3 C22 C21 1.7(3) . . . . ? 
N1 C21 C22 N3 2.2(4) . . . . ? 
C26 C21 C22 N3 -179.4(3) . . . . ? 
N1 C21 C22 C23 -175.1(3) . . . . ? 
C26 C21 C22 C23 3.3(4) . . . . ? 
N3 C22 C23 C24 -179.0(3) . . . . ? 
C21 C22 C23 C24 -2.2(5) . . . . ? 
C22 C23 C24 C25 -0.2(5) . . . . ? 
C23 C24 C25 C26 1.4(5) . . . . ? 
C24 C25 C26 C21 -0.2(5) . . . . ? 
N1 C21 C26 C25 176.0(3) . . . . ? 
C22 C21 C26 C25 -2.1(5) . . . . ? 
C37 N2 C31 C36 5.8(5) . . . . ? 
Fe1 N2 C31 C36 -179.4(3) . . . . ? 
C37 N2 C31 C32 -175.0(3) . . . . ? 
Fe1 N2 C31 C32 -0.2(3) . . . . ? 
C51 N4 C32 C31 171.7(2) . . . . ? 
Fe1 N4 C32 C31 -3.6(3) . . . . ? 
C51 N4 C32 C33 -9.4(4) . . . . ? 
Fe1 N4 C32 C33 175.4(2) . . . . ? 
N2 C31 C32 N4 2.5(4) . . . . ? 
C36 C31 C32 N4 -178.3(3) . . . . ? 
N2 C31 C32 C33 -176.6(3) . . . . ? 
C36 C31 C32 C33 2.7(4) . . . . ? 
N4 C32 C33 C34 179.7(3) . . . . ? 
C31 C32 C33 C34 -1.4(4) . . . . ? 
C32 C33 C34 C35 -0.3(5) . . . . ? 
C33 C34 C35 C36 0.6(5) . . . . ? 
C34 C35 C36 C31 0.7(5) . . . . ? 
N2 C31 C36 C35 176.8(3) . . . . ? 
C32 C31 C36 C35 -2.4(5) . . . . ? 
C22 N3 C41 C42 118.8(3) . . . . ? 
Fe1 N3 C41 C42 -63.6(3) . . . . ? 
C22 N3 C41 C46 -66.4(4) . . . . ? 
Fe1 N3 C41 C46 111.2(3) . . . . ? 
C46 C41 C42 C43 -2.1(4) . . . . ? 
N3 C41 C42 C43 172.7(3) . . . . ? 
C41 C42 C43 C44 0.8(5) . . . . ? 
C42 C43 C44 C45 0.9(5) . . . . ? 
C43 C44 C45 C46 -1.3(5) . . . . ? 
C44 C45 C46 C41 0.0(5) . . . . ? 
C42 C41 C46 C45 1.7(4) . . . . ? 
N3 C41 C46 C45 -173.1(3) . . . . ? 
C32 N4 C51 C52 104.6(3) . . . . ? 
Fe1 N4 C51 C52 -81.0(3) . . . . ? 
C32 N4 C51 C56 -75.9(3) . . . . ? 
Fe1 N4 C51 C56 98.6(3) . . . . ? 
C56 C51 C52 C53 2.0(5) . . . . ? 
N4 C51 C52 C53 -178.5(3) . . . . ? 
C51 C52 C53 C54 -0.6(5) . . . . ? 
C52 C53 C54 C55 -0.5(5) . . . . ? 
C53 C54 C55 C56 0.2(5) . . . . ? 
C54 C55 C56 C51 1.2(5) . . . . ? 
C52 C51 C56 C55 -2.2(5) . . . . ? 
N4 C51 C56 C55 178.2(3) . . . . ? 
C13 C12 C121 C122 -44.5(4) . . . . ? 
C11 C12 C121 C122 134.5(3) . . . . ? 
C13 C12 C121 C126 132.0(3) . . . . ? 
C11 C12 C121 C126 -49.0(5) . . . . ? 
C126 C121 C122 C123 1.3(5) . . . . ? 
C12 C121 C122 C123 177.9(3) . . . . ? 
C121 C122 C123 C124 0.1(6) . . . . ? 
C122 C123 C124 C125 -0.8(7) . . . . ? 
C123 C124 C125 C126 0.2(7) . . . . ? 
C124 C125 C126 C121 1.2(6) . . . . ? 
C122 C121 C126 C125 -2.0(5) . . . . ? 
C12 C121 C126 C125 -178.4(3) . . . . ? 
C15 C14 C141 C142 -144.5(3) . . . . ? 
C13 C14 C141 C142 36.7(4) . . . . ? 
C15 C14 C141 C146 33.3(4) . . . . ? 
C13 C14 C141 C146 -145.6(3) . . . . ? 
C146 C141 C142 C143 -1.7(5) . . . . ? 
C14 C141 C142 C143 176.2(3) . . . . ? 
C141 C142 C143 C144 0.9(6) . . . . ? 
C142 C143 C144 C145 0.6(6) . . . . ? 
C143 C144 C145 C146 -1.3(6) . . . . ? 
C144 C145 C146 C141 0.5(6) . . . . ? 
C142 C141 C146 C145 1.0(5) . . . . ? 
C14 C141 C146 C145 -176.9(3) . . . . ? 
C15 C16 C161 C166 -124.5(3) . . . . ? 
C11 C16 C161 C166 53.1(4) . . . . ? 
C15 C16 C161 C162 47.3(4) . . . . ? 
C11 C16 C161 C162 -135.1(3) . . . . ? 
C166 C161 C162 C163 0.5(5) . . . . ? 
C16 C161 C162 C163 -171.5(3) . . . . ? 
C161 C162 C163 C164 0.7(5) . . . . ? 
C162 C163 C164 C165 -1.1(5) . . . . ? 
C163 C164 C165 C166 0.4(5) . . . . ? 
C162 C161 C166 C165 -1.3(5) . . . . ? 
C16 C161 C166 C165 170.6(3) . . . . ? 
C164 C165 C166 C161 0.9(5) . . . . ? 
 
 
data_5b 
 
_audit_creation_method            SHELXL-97 
_chemical_name_systematic 
; 
 ? 
; 
_chemical_name_common             'tolyl ortho-semidine complex (5b)' 
_chemical_melting_point           ? 
_chemical_formula_moiety           
'[(Fe 3+) (C15 H16 N2 1-)2 (C24 H17 S 1-)], C4H10O' 
_chemical_formula_structural      'Fe(N2 C15 H16)2(S C24 H17) C4H10O' 
_chemical_formula_sum             'C58 H59 Fe N4 O S' 
_chemical_formula_weight          916.00 
_chemical_compound_source         'Synthesis, S. C. Lee lab'
 
loop_ 
 _atom_type_symbol 
 _atom_type_description 
 _atom_type_scat_dispersion_real 
 _atom_type_scat_dispersion_imag 
 _atom_type_scat_source 
 'C'  'C'   0.0033   0.0016 
 'International Tables Vol C Tables 4.2.6.8 and 6.1.1.4' 
 'H'  'H'   0.0000   0.0000 
 'International Tables Vol C Tables 4.2.6.8 and 6.1.1.4' 
 'N'  'N'   0.0061   0.0033 
 'International Tables Vol C Tables 4.2.6.8 and 6.1.1.4' 
 'S'  'S'   0.1246   0.1234 
 'International Tables Vol C Tables 4.2.6.8 and 6.1.1.4' 
 'Fe'  'Fe'   0.3463   0.8444 
 'International Tables Vol C Tables 4.2.6.8 and 6.1.1.4' 
 'O'  'O'   0.0106   0.0060 
 'International Tables Vol C Tables 4.2.6.8 and 6.1.1.4' 
 
_symmetry_cell_setting            'monoclinic' 
_symmetry_space_group_name_H-M    'P2(1)/n' 
 
loop_ 
 _symmetry_equiv_pos_as_xyz 
 'x, y, z' 
 '-x+1/2, y+1/2, -z+1/2' 
 '-x, -y, -z' 
 'x-1/2, -y-1/2, z-1/2' 
 
_cell_length_a                    12.006(2) 
_cell_length_b                    20.159(4) 
_cell_length_c                    20.486(4) 
_cell_angle_alpha                 90.00 
_cell_angle_beta                  96.24(3) 
_cell_angle_gamma                 90.00 
_cell_volume                      4929.2(17) 
_cell_formula_units_Z             4 
_cell_measurement_temperature     200(2) 
_cell_measurement_reflns_used     16676 
_cell_measurement_theta_min       1.42 
_cell_measurement_theta_max       22.46 
 
_exptl_crystal_description        'plate' 
_exptl_crystal_colour             'dark blue/black' 
_exptl_crystal_size_max           0.38 
_exptl_crystal_size_mid           0.20 
_exptl_crystal_size_min           0.20 
_exptl_crystal_density_meas       ? 
_exptl_crystal_density_diffrn     1.234 
_exptl_crystal_density_method     'not measured' 
_exptl_crystal_F_000              1940 
_exptl_absorpt_coefficient_mu     0.392 
_exptl_absorpt_correction_type    'none' 
_exptl_absorpt_correction_T_min   ? 
_exptl_absorpt_correction_T_max   ? 
_exptl_absorpt_process_details    ? 
 
_exptl_special_details 
; 
Dark Black/purple crystal mounted on a glass fiber with Apiezon N.
Collected to 50 degrees in 3 scan sets.  Scaled to 45 degrees.  
HIGH MOSAICITY, giving problems for final R factors.
; 
 
_diffrn_ambient_temperature       200(2) 
_diffrn_radiation_wavelength      0.71073 
_diffrn_radiation_type            MoK\a 
_diffrn_radiation_source          'fine-focus sealed tube' 
_diffrn_radiation_monochromator   graphite 
_diffrn_measurement_device_type   'Nonius KappaCCD' 
_diffrn_measurement_method        '\w scans' 
_diffrn_detector_area_resol_mean  ? 
_diffrn_standards_number          0 
_diffrn_standards_interval_count  ? 
_diffrn_standards_interval_time   ? 
_diffrn_standards_decay_%         ? 
_diffrn_reflns_number             16676 
_diffrn_reflns_av_R_equivalents   0.068 
_diffrn_reflns_av_sigmaI/netI     0.0792 
_diffrn_reflns_limit_h_min        0 
_diffrn_reflns_limit_h_max        12 
_diffrn_reflns_limit_k_min        0 
_diffrn_reflns_limit_k_max        21 
_diffrn_reflns_limit_l_min        -21 
_diffrn_reflns_limit_l_max        21 
_diffrn_reflns_theta_min          1.88 
_diffrn_reflns_theta_max          22.46 
_diffrn_measured_fraction_theta_max    0.994 
_diffrn_reflns_theta_full              22.46 
_diffrn_measured_fraction_theta_full   0.994 
_refine_diff_density_max    0.383 
_refine_diff_density_min   -0.293 
_refine_diff_density_rms    0.051
_reflns_number_total              6375 
_reflns_number_gt                 5338 
_reflns_threshold_expression      >2sigma(I) 
 
_computing_data_collection        'NONIUS COLLECT'
_computing_cell_refinement        'DENZO-SMN'
_computing_data_reduction         'DENZO-SMN, Platon, Siemens SHELXTL'
_computing_structure_solution     'Siemens SHELXTL'
_computing_structure_refinement   'Siemens SHELXTL'
_computing_molecular_graphics     'Siemens SHELXTL'
_computing_publication_material   'CIFTAB, Siemens SHELXTL' 
 
_refine_special_details 
; 
 Refinement of F^2^ against ALL reflections.  The weighted R-factor wR and 
 goodness of fit S are based on F^2^, conventional R-factors R are based 
 on F, with F set to zero for negative F^2^. The threshold expression of 
 F^2^ > 2sigma(F^2^) is used only for calculating R-factors(gt) etc. and is 
 not relevant to the choice of reflections for refinement.  R-factors based 
 on F^2^ are statistically about twice as large as those based on F, and R- 
 factors based on ALL data will be even larger. 
; 
 
_refine_ls_structure_factor_coef  Fsqd  
_refine_ls_matrix_type            full 
_refine_ls_weighting_scheme       calc  
_refine_ls_weighting_details 
 'calc w=1/[\s^2^(Fo^2^)+(0.0000P)^2^+6.6460P] where P=(Fo^2^+2Fc^2^)/3' 
_atom_sites_solution_primary      direct 
_atom_sites_solution_secondary    difmap 
_atom_sites_solution_hydrogens    geom 
_refine_ls_hydrogen_treatment     constr 
_refine_ls_extinction_method      none 
_refine_ls_extinction_coef        ? 
_refine_ls_number_reflns          6375 
_refine_ls_number_parameters      591 
_refine_ls_number_restraints      0 
_refine_ls_R_factor_all           0.1008 
_refine_ls_R_factor_gt            0.0785 
_refine_ls_wR_factor_ref          0.1349 
_refine_ls_wR_factor_gt           0.1273 
_refine_ls_goodness_of_fit_ref    1.205 
_refine_ls_restrained_S_all       1.205 
_refine_ls_shift/su_max           0.000 
_refine_ls_shift/su_mean          0.000 
 
loop_ 
 _atom_site_label 
 _atom_site_type_symbol 
 _atom_site_fract_x 
 _atom_site_fract_y 
 _atom_site_fract_z 
 _atom_site_U_iso_or_equiv 
 _atom_site_adp_type 
 _atom_site_occupancy 
 _atom_site_symmetry_multiplicity 
 _atom_site_calc_flag 
 _atom_site_refinement_flags 
 _atom_site_disorder_assembly 
 _atom_site_disorder_group 
Fe1 Fe 0.42282(5) 0.85150(3) 0.12177(3) 0.0297(2) Uani 1 1 d . . . 
N1 N 0.4681(3) 0.79327(17) 0.05676(16) 0.0312(9) Uani 1 1 d . . . 
N2 N 0.3844(3) 0.91426(18) 0.18468(16) 0.0319(9) Uani 1 1 d . . . 
N3 N 0.5449(3) 0.90261(17) 0.09662(16) 0.0298(9) Uani 1 1 d . . . 
N4 N 0.2681(3) 0.86318(17) 0.08888(16) 0.0314(9) Uani 1 1 d . . . 
S1 S 0.43929(10) 0.77671(6) 0.20405(5) 0.0363(3) Uani 1 1 d . . . 
O1S O 0.7341(5) 0.6303(3) -0.1042(3) 0.127(2) Uani 1 1 d . . . 
C1S C 0.6412(7) 0.6309(4) -0.1530(4) 0.112(3) Uani 1 1 d . . . 
H1SA H 0.5715 0.6403 -0.1329 0.134 Uiso 1 1 calc R . . 
H1SB H 0.6332 0.5872 -0.1751 0.134 Uiso 1 1 calc R . . 
C2S C 0.7383(9) 0.5810(4) -0.0596(5) 0.145(4) Uani 1 1 d . . . 
H2SA H 0.7260 0.5381 -0.0828 0.174 Uiso 1 1 calc R . . 
H2SB H 0.6770 0.5871 -0.0315 0.174 Uiso 1 1 calc R . . 
C3S C 0.6607(6) 0.6823(4) -0.2002(3) 0.100(2) Uani 1 1 d . . . 
H3SA H 0.5974 0.6839 -0.2346 0.150 Uiso 1 1 calc R . . 
H3SB H 0.7296 0.6724 -0.2199 0.150 Uiso 1 1 calc R . . 
H3SC H 0.6683 0.7253 -0.1778 0.150 Uiso 1 1 calc R . . 
C4S C 0.8456(9) 0.5787(6) -0.0179(5) 0.190(6) Uani 1 1 d . . . 
H4SA H 0.8442 0.5423 0.0138 0.284 Uiso 1 1 calc R . . 
H4SB H 0.8577 0.6208 0.0057 0.284 Uiso 1 1 calc R . . 
H4SC H 0.9065 0.5713 -0.0453 0.284 Uiso 1 1 calc R . . 
C11 C 0.5086(4) 0.7027(2) 0.18367(19) 0.0324(12) Uani 1 1 d . . . 
C12 C 0.4457(4) 0.6437(2) 0.1731(2) 0.0338(11) Uani 1 1 d . . . 
C13 C 0.4981(4) 0.5861(2) 0.1544(2) 0.0381(12) Uani 1 1 d . . . 
H13A H 0.4545 0.5469 0.1475 0.046 Uiso 1 1 calc R . . 
C14 C 0.6111(4) 0.5834(2) 0.1453(2) 0.0349(12) Uani 1 1 d . . . 
C15 C 0.6724(4) 0.6419(2) 0.1578(2) 0.0365(12) Uani 1 1 d . . . 
H15A H 0.7502 0.6414 0.1530 0.044 Uiso 1 1 calc R . . 
C16 C 0.6245(4) 0.7013(2) 0.17708(19) 0.0319(11) Uani 1 1 d . . . 
C21 C 0.5636(4) 0.8090(2) 0.0329(2) 0.0291(11) Uani 1 1 d . . . 
C22 C 0.6225(4) 0.7719(2) -0.0113(2) 0.0376(12) Uani 1 1 d . . . 
H22A H 0.5976 0.7288 -0.0246 0.045 Uiso 1 1 calc R . . 
C23 C 0.7152(4) 0.7985(2) -0.0344(2) 0.0414(13) Uani 1 1 d . . . 
H23A H 0.7547 0.7727 -0.0632 0.050 Uiso 1 1 calc R . . 
C24 C 0.7545(4) 0.8630(2) -0.0171(2) 0.0378(12) Uani 1 1 d . . . 
C25 C 0.7001(4) 0.8993(2) 0.0257(2) 0.0344(12) Uani 1 1 d . . . 
H25A H 0.7257 0.9428 0.0375 0.041 Uiso 1 1 calc R . . 
C26 C 0.6060(4) 0.8731(2) 0.0529(2) 0.0284(11) Uani 1 1 d . . . 
C27 C 0.4141(4) 0.7311(2) 0.0346(2) 0.0401(12) Uani 1 1 d . . . 
H27A H 0.3931 0.7329 -0.0129 0.060 Uiso 1 1 calc R . . 
H27B H 0.3468 0.7244 0.0569 0.060 Uiso 1 1 calc R . . 
H27C H 0.4661 0.6942 0.0450 0.060 Uiso 1 1 calc R . . 
C31 C 0.2785(4) 0.9364(2) 0.1774(2) 0.0333(11) Uani 1 1 d . . . 
C32 C 0.2302(4) 0.9846(2) 0.2163(2) 0.0410(13) Uani 1 1 d . . . 
H32A H 0.2721 1.0029 0.2540 0.049 Uiso 1 1 calc R . . 
C33 C 0.1221(4) 1.0041(2) 0.1985(2) 0.0437(13) Uani 1 1 d . . . 
H33A H 0.0898 1.0364 0.2245 0.052 Uiso 1 1 calc R . . 
C34 C 0.0568(4) 0.9782(2) 0.1430(2) 0.0404(12) Uani 1 1 d . . . 
C35 C 0.1009(4) 0.9302(2) 0.1063(2) 0.0354(12) Uani 1 1 d . . . 
H35A H 0.0561 0.9113 0.0699 0.042 Uiso 1 1 calc R . . 
C36 C 0.2119(4) 0.9085(2) 0.1218(2) 0.0311(11) Uani 1 1 d . . . 
C37 C 0.4583(4) 0.9358(3) 0.2422(2) 0.0477(14) Uani 1 1 d . . . 
H37A H 0.4663 0.9842 0.2414 0.072 Uiso 1 1 calc R . . 
H37B H 0.5320 0.9151 0.2416 0.072 Uiso 1 1 calc R . . 
H37C H 0.4260 0.9226 0.2822 0.072 Uiso 1 1 calc R . . 
C41 C 0.5681(4) 0.9702(2) 0.1152(2) 0.0282(11) Uani 1 1 d . . . 
C42 C 0.6601(4) 0.9888(2) 0.1574(2) 0.0364(12) Uani 1 1 d . . . 
H42A H 0.7140 0.9565 0.1733 0.044 Uiso 1 1 calc R . . 
C43 C 0.6743(4) 1.0544(2) 0.1768(2) 0.0374(12) Uani 1 1 d . . . 
H43A H 0.7385 1.0664 0.2055 0.045 Uiso 1 1 calc R . . 
C44 C 0.5977(4) 1.1027(2) 0.1554(2) 0.0348(12) Uani 1 1 d . . . 
C45 C 0.5054(4) 1.0836(2) 0.1129(2) 0.0383(12) Uani 1 1 d . . . 
H45A H 0.4516 1.1159 0.0971 0.046 Uiso 1 1 calc R . . 
C46 C 0.4903(4) 1.0185(2) 0.0932(2) 0.0370(12) Uani 1 1 d . . . 
H46A H 0.4261 1.0066 0.0644 0.044 Uiso 1 1 calc R . . 
C51 C 0.2030(4) 0.8276(2) 0.0376(2) 0.0295(11) Uani 1 1 d . . . 
C52 C 0.1327(4) 0.7776(2) 0.0535(2) 0.0386(12) Uani 1 1 d . . . 
H52A H 0.1287 0.7666 0.0983 0.046 Uiso 1 1 calc R . . 
C53 C 0.0674(4) 0.7432(2) 0.0047(2) 0.0414(13) Uani 1 1 d . . . 
H53A H 0.0195 0.7087 0.0163 0.050 Uiso 1 1 calc R . . 
C54 C 0.0714(4) 0.7586(3) -0.0605(2) 0.0412(13) Uani 1 1 d . . . 
C55 C 0.1440(4) 0.8084(3) -0.0759(2) 0.0423(13) Uani 1 1 d . . . 
H55A H 0.1482 0.8192 -0.1207 0.051 Uiso 1 1 calc R . . 
C56 C 0.2101(4) 0.8426(2) -0.0278(2) 0.0385(12) Uani 1 1 d . . . 
H56A H 0.2600 0.8761 -0.0394 0.046 Uiso 1 1 calc R . . 
C121 C 0.3227(4) 0.6393(2) 0.1786(2) 0.0401(12) Uani 1 1 d . . . 
C122 C 0.2765(4) 0.6580(3) 0.2352(3) 0.0534(15) Uani 1 1 d . . . 
H12A H 0.3233 0.6763 0.2711 0.064 Uiso 1 1 calc R . . 
C123 C 0.1640(5) 0.6501(3) 0.2399(3) 0.0720(18) Uani 1 1 d . . . 
H12B H 0.1342 0.6631 0.2790 0.086 Uiso 1 1 calc R . . 
C124 C 0.0935(5) 0.6239(3) 0.1888(4) 0.078(2) Uani 1 1 d . . . 
H12C H 0.0158 0.6191 0.1926 0.094 Uiso 1 1 calc R . . 
C125 C 0.1369(5) 0.6049(3) 0.1327(4) 0.0712(18) Uani 1 1 d . . . 
H12D H 0.0892 0.5866 0.0973 0.085 Uiso 1 1 calc R . . 
C126 C 0.2511(5) 0.6125(3) 0.1274(3) 0.0521(14) Uani 1 1 d . . . 
H12E H 0.2805 0.5991 0.0882 0.063 Uiso 1 1 calc R . . 
C141 C 0.6637(4) 0.5228(2) 0.1219(2) 0.0364(12) Uani 1 1 d . . . 
C142 C 0.6027(4) 0.4808(2) 0.0772(2) 0.0458(13) Uani 1 1 d . . . 
H14A H 0.5262 0.4904 0.0637 0.055 Uiso 1 1 calc R . . 
C143 C 0.6513(5) 0.4256(3) 0.0520(2) 0.0567(15) Uani 1 1 d . . . 
H14B H 0.6080 0.3977 0.0216 0.068 Uiso 1 1 calc R . . 
C144 C 0.7614(5) 0.4109(3) 0.0705(3) 0.0594(16) Uani 1 1 d . . . 
H14C H 0.7948 0.3731 0.0530 0.071 Uiso 1 1 calc R . . 
C145 C 0.8241(5) 0.4516(3) 0.1153(2) 0.0551(15) Uani 1 1 d . . . 
H14D H 0.9005 0.4417 0.1287 0.066 Uiso 1 1 calc R . . 
C146 C 0.7749(4) 0.5065(2) 0.1402(2) 0.0440(13) Uani 1 1 d . . . 
H14E H 0.8184 0.5339 0.1709 0.053 Uiso 1 1 calc R . . 
C161 C 0.7038(4) 0.7583(2) 0.1894(2) 0.0342(12) Uani 1 1 d . . . 
C162 C 0.7090(4) 0.7959(2) 0.2468(2) 0.0408(13) Uani 1 1 d . . . 
H16A H 0.6550 0.7890 0.2768 0.049 Uiso 1 1 calc R . . 
C163 C 0.7922(4) 0.8431(3) 0.2607(3) 0.0481(14) Uani 1 1 d . . . 
H16B H 0.7955 0.8676 0.3004 0.058 Uiso 1 1 calc R . . 
C164 C 0.8694(4) 0.8547(3) 0.2176(3) 0.0542(15) Uani 1 1 d . . . 
H16C H 0.9262 0.8871 0.2274 0.065 Uiso 1 1 calc R . . 
C165 C 0.8645(4) 0.8191(3) 0.1599(3) 0.0479(14) Uani 1 1 d . . . 
H16D H 0.9171 0.8274 0.1294 0.057 Uiso 1 1 calc R . . 
C166 C 0.7829(4) 0.7712(2) 0.1465(2) 0.0398(12) Uani 1 1 d . . . 
H16E H 0.7809 0.7465 0.1070 0.048 Uiso 1 1 calc R . . 
C241 C 0.8524(4) 0.8905(3) -0.0481(2) 0.0542(15) Uani 1 1 d . . . 
H24A H 0.8799 0.8571 -0.0771 0.081 Uiso 1 1 calc R . . 
H24B H 0.9123 0.9023 -0.0137 0.081 Uiso 1 1 calc R . . 
H24C H 0.8288 0.9302 -0.0736 0.081 Uiso 1 1 calc R . . 
C341 C -0.0589(4) 1.0052(3) 0.1253(3) 0.0597(16) Uani 1 1 d . . . 
H34A H -0.1049 0.9719 0.1001 0.090 Uiso 1 1 calc R . . 
H34B H -0.0547 1.0454 0.0987 0.090 Uiso 1 1 calc R . . 
H34C H -0.0926 1.0160 0.1655 0.090 Uiso 1 1 calc R . . 
C441 C 0.6122(4) 1.1739(2) 0.1761(2) 0.0497(14) Uani 1 1 d . . . 
H44A H 0.6818 1.1788 0.2054 0.075 Uiso 1 1 calc R . . 
H44B H 0.5486 1.1876 0.1992 0.075 Uiso 1 1 calc R . . 
H44C H 0.6155 1.2019 0.1372 0.075 Uiso 1 1 calc R . . 
C541 C -0.0029(4) 0.7222(3) -0.1134(2) 0.0580(16) Uani 1 1 d . . . 
H54A H -0.0726 0.7090 -0.0962 0.087 Uiso 1 1 calc R . . 
H54B H 0.0361 0.6826 -0.1269 0.087 Uiso 1 1 calc R . . 
H54C H -0.0201 0.7515 -0.1514 0.087 Uiso 1 1 calc R . . 
 
loop_ 
 _atom_site_aniso_label 
 _atom_site_aniso_U_11 
 _atom_site_aniso_U_22 
 _atom_site_aniso_U_33 
 _atom_site_aniso_U_23 
 _atom_site_aniso_U_13 
 _atom_site_aniso_U_12 
Fe1 0.0288(4) 0.0249(4) 0.0355(4) -0.0032(3) 0.0039(3) 0.0015(3) 
N1 0.035(2) 0.021(2) 0.037(2) -0.0002(17) 0.0036(18) -0.0002(18) 
N2 0.029(2) 0.026(2) 0.040(2) -0.0073(18) 0.0013(18) -0.0015(18) 
N3 0.028(2) 0.023(2) 0.038(2) -0.0021(18) 0.0005(18) 0.0022(18) 
N4 0.032(2) 0.026(2) 0.037(2) -0.0026(18) 0.0027(18) 0.0026(18) 
S1 0.0400(8) 0.0332(8) 0.0370(7) 0.0015(6) 0.0108(5) 0.0080(6) 
O1S 0.152(5) 0.098(5) 0.126(5) 0.019(4) -0.009(4) -0.035(4) 
C1S 0.117(7) 0.130(8) 0.087(6) -0.030(5) 0.003(5) -0.031(6) 
C2S 0.195(11) 0.084(7) 0.160(9) 0.034(6) 0.036(8) -0.049(7) 
C3S 0.101(6) 0.108(7) 0.091(5) -0.004(5) 0.004(4) -0.024(5) 
C4S 0.175(11) 0.219(13) 0.161(9) 0.117(9) -0.044(8) -0.084(9) 
C11 0.042(3) 0.030(3) 0.025(2) 0.001(2) 0.004(2) 0.005(2) 
C12 0.035(3) 0.034(3) 0.034(3) 0.004(2) 0.007(2) 0.005(3) 
C13 0.040(3) 0.035(3) 0.039(3) 0.001(2) 0.003(2) -0.002(3) 
C14 0.041(3) 0.029(3) 0.035(3) 0.004(2) 0.003(2) 0.007(3) 
C15 0.033(3) 0.040(3) 0.037(3) 0.001(2) 0.005(2) 0.010(3) 
C16 0.033(3) 0.034(3) 0.029(2) 0.004(2) 0.005(2) 0.004(2) 
C21 0.031(3) 0.025(3) 0.031(2) -0.002(2) 0.002(2) 0.005(2) 
C22 0.044(3) 0.030(3) 0.039(3) -0.008(2) 0.004(2) 0.009(3) 
C23 0.042(3) 0.040(3) 0.044(3) -0.002(2) 0.013(2) 0.014(3) 
C24 0.034(3) 0.039(3) 0.041(3) 0.009(2) 0.006(2) 0.005(3) 
C25 0.031(3) 0.031(3) 0.041(3) -0.001(2) 0.001(2) 0.004(2) 
C26 0.027(3) 0.025(3) 0.034(3) 0.003(2) 0.002(2) 0.008(2) 
C27 0.046(3) 0.030(3) 0.045(3) -0.006(2) 0.006(2) -0.002(2) 
C31 0.034(3) 0.028(3) 0.038(3) 0.002(2) 0.006(2) -0.001(2) 
C32 0.043(3) 0.037(3) 0.044(3) -0.011(2) 0.009(2) 0.004(3) 
C33 0.042(3) 0.037(3) 0.055(3) -0.011(3) 0.018(3) 0.004(3) 
C34 0.029(3) 0.033(3) 0.061(3) -0.002(3) 0.011(2) 0.000(2) 
C35 0.025(3) 0.029(3) 0.053(3) -0.003(2) 0.005(2) 0.000(2) 
C36 0.033(3) 0.024(3) 0.037(3) -0.001(2) 0.005(2) 0.000(2) 
C37 0.048(3) 0.048(4) 0.046(3) -0.012(3) -0.002(3) 0.002(3) 
C41 0.026(3) 0.027(3) 0.032(2) -0.003(2) 0.004(2) -0.001(2) 
C42 0.028(3) 0.037(3) 0.044(3) 0.001(2) 0.003(2) 0.006(2) 
C43 0.026(3) 0.039(3) 0.046(3) -0.005(2) 0.000(2) -0.004(2) 
C44 0.038(3) 0.028(3) 0.040(3) -0.006(2) 0.013(2) -0.007(2) 
C45 0.041(3) 0.025(3) 0.046(3) 0.003(2) -0.002(2) 0.004(2) 
C46 0.037(3) 0.033(3) 0.039(3) 0.002(2) -0.006(2) -0.001(2) 
C51 0.027(3) 0.029(3) 0.032(3) -0.003(2) 0.002(2) 0.004(2) 
C52 0.044(3) 0.039(3) 0.033(3) 0.001(2) 0.004(2) -0.010(3) 
C53 0.036(3) 0.036(3) 0.053(3) -0.006(3) 0.006(2) -0.007(2) 
C54 0.038(3) 0.046(3) 0.039(3) -0.014(3) -0.001(2) 0.008(3) 
C55 0.034(3) 0.058(4) 0.035(3) -0.001(3) 0.003(2) 0.005(3) 
C56 0.034(3) 0.040(3) 0.043(3) 0.002(2) 0.008(2) -0.003(2) 
C121 0.041(3) 0.029(3) 0.052(3) 0.010(2) 0.012(3) 0.004(2) 
C122 0.050(4) 0.038(3) 0.077(4) 0.000(3) 0.031(3) -0.002(3) 
C123 0.057(4) 0.059(4) 0.108(5) -0.001(4) 0.047(4) -0.002(4) 
C124 0.038(4) 0.059(5) 0.142(7) 0.013(4) 0.031(4) 0.002(3) 
C125 0.048(4) 0.055(4) 0.108(5) 0.014(4) -0.003(4) -0.008(3) 
C126 0.049(4) 0.042(4) 0.065(4) 0.008(3) 0.005(3) -0.004(3) 
C141 0.044(3) 0.026(3) 0.039(3) 0.002(2) 0.009(2) 0.005(2) 
C142 0.046(3) 0.039(3) 0.051(3) -0.004(3) 0.000(3) 0.004(3) 
C143 0.070(4) 0.045(4) 0.054(3) -0.013(3) 0.005(3) 0.005(3) 
C144 0.082(5) 0.037(4) 0.060(4) -0.008(3) 0.009(3) 0.017(3) 
C145 0.055(4) 0.056(4) 0.055(3) -0.003(3) 0.010(3) 0.022(3) 
C146 0.047(3) 0.041(3) 0.043(3) -0.005(2) 0.002(3) 0.008(3) 
C161 0.031(3) 0.030(3) 0.041(3) 0.003(2) 0.001(2) 0.009(2) 
C162 0.036(3) 0.036(3) 0.050(3) 0.003(3) 0.004(2) 0.012(3) 
C163 0.048(4) 0.034(3) 0.060(3) -0.007(3) -0.006(3) 0.006(3) 
C164 0.034(3) 0.043(4) 0.083(4) 0.003(3) -0.009(3) -0.001(3) 
C165 0.037(3) 0.047(4) 0.059(4) 0.009(3) 0.002(3) 0.005(3) 
C166 0.038(3) 0.042(3) 0.038(3) 0.002(2) 0.000(2) 0.001(3) 
C241 0.050(4) 0.059(4) 0.055(3) 0.006(3) 0.015(3) 0.007(3) 
C341 0.034(3) 0.052(4) 0.095(4) -0.008(3) 0.014(3) 0.010(3) 
C441 0.051(4) 0.037(3) 0.062(3) -0.011(3) 0.013(3) -0.014(3) 
C541 0.047(3) 0.070(4) 0.055(3) -0.018(3) -0.002(3) 0.002(3) 
 
_geom_special_details 
; 
 All esds (except the esd in the dihedral angle between two l.s. planes) 
 are estimated using the full covariance matrix.  The cell esds are taken 
 into account individually in the estimation of esds in distances, angles 
 and torsion angles; correlations between esds in cell parameters are only 
 used when they are defined by crystal symmetry.  An approximate (isotropic) 
 treatment of cell esds is used for estimating esds involving l.s. planes. 
; 
 
loop_ 
 _geom_bond_atom_site_label_1 
 _geom_bond_atom_site_label_2 
 _geom_bond_distance 
 _geom_bond_site_symmetry_2 
 _geom_bond_publ_flag 
Fe1 N1 1.898(4) . ? 
Fe1 N2 1.899(3) . ? 
Fe1 N3 1.908(4) . ? 
Fe1 N4 1.920(4) . ? 
Fe1 S1 2.2543(13) . ? 
N1 C21 1.334(5) . ? 
N1 C27 1.461(5) . ? 
N2 C31 1.340(5) . ? 
N2 C37 1.462(5) . ? 
N3 C26 1.355(5) . ? 
N3 C41 1.434(5) . ? 
N4 C36 1.358(5) . ? 
N4 C51 1.432(5) . ? 
S1 C11 1.780(5) . ? 
O1S C2S 1.348(9) . ? 
O1S C1S 1.414(8) . ? 
C1S C3S 1.453(9) . ? 
C2S C4S 1.468(11) . ? 
C11 C12 1.413(6) . ? 
C11 C16 1.414(6) . ? 
C12 C13 1.394(6) . ? 
C12 C121 1.496(6) . ? 
C13 C14 1.391(6) . ? 
C14 C15 1.399(6) . ? 
C14 C141 1.479(6) . ? 
C15 C16 1.402(6) . ? 
C16 C161 1.497(6) . ? 
C21 C22 1.420(6) . ? 
C21 C26 1.431(6) . ? 
C22 C23 1.365(6) . ? 
C23 C24 1.416(6) . ? 
C24 C25 1.363(6) . ? 
C24 C241 1.500(7) . ? 
C25 C26 1.416(6) . ? 
C31 C32 1.419(6) . ? 
C31 C36 1.435(6) . ? 
C32 C33 1.366(6) . ? 
C33 C34 1.409(6) . ? 
C34 C35 1.368(6) . ? 
C34 C341 1.500(6) . ? 
C35 C36 1.406(6) . ? 
C41 C42 1.378(6) . ? 
C41 C46 1.390(6) . ? 
C42 C43 1.386(6) . ? 
C43 C44 1.377(6) . ? 
C44 C45 1.388(6) . ? 
C44 C441 1.502(6) . ? 
C45 C46 1.378(6) . ? 
C51 C52 1.377(6) . ? 
C51 C56 1.384(6) . ? 
C52 C53 1.388(6) . ? 
C53 C54 1.377(6) . ? 
C54 C55 1.388(7) . ? 
C54 C541 1.516(6) . ? 
C55 C56 1.381(6) . ? 
C121 C122 1.389(7) . ? 
C121 C126 1.392(7) . ? 
C122 C123 1.374(7) . ? 
C123 C124 1.377(8) . ? 
C124 C125 1.368(8) . ? 
C125 C126 1.396(7) . ? 
C141 C146 1.386(6) . ? 
C141 C142 1.395(6) . ? 
C142 C143 1.383(7) . ? 
C143 C144 1.368(7) . ? 
C144 C145 1.390(7) . ? 
C145 C146 1.377(7) . ? 
C161 C166 1.386(6) . ? 
C161 C162 1.394(6) . ? 
C162 C163 1.387(7) . ? 
C163 C164 1.368(7) . ? 
C164 C165 1.379(7) . ? 
C165 C166 1.382(6) . ? 
 
loop_ 
 _geom_angle_atom_site_label_1 
 _geom_angle_atom_site_label_2 
 _geom_angle_atom_site_label_3 
 _geom_angle 
 _geom_angle_site_symmetry_1 
 _geom_angle_site_symmetry_3 
 _geom_angle_publ_flag 
N1 Fe1 N2 175.99(16) . . ? 
N1 Fe1 N3 81.82(16) . . ? 
N2 Fe1 N3 94.24(15) . . ? 
N1 Fe1 N4 99.75(15) . . ? 
N2 Fe1 N4 81.91(15) . . ? 
N3 Fe1 N4 125.54(15) . . ? 
N1 Fe1 S1 95.88(11) . . ? 
N2 Fe1 S1 86.91(11) . . ? 
N3 Fe1 S1 123.75(11) . . ? 
N4 Fe1 S1 110.32(11) . . ? 
C21 N1 C27 117.5(4) . . ? 
C21 N1 Fe1 115.7(3) . . ? 
C27 N1 Fe1 126.7(3) . . ? 
C31 N2 C37 118.4(4) . . ? 
C31 N2 Fe1 116.4(3) . . ? 
C37 N2 Fe1 125.1(3) . . ? 
C26 N3 C41 119.3(4) . . ? 
C26 N3 Fe1 115.3(3) . . ? 
C41 N3 Fe1 125.0(3) . . ? 
C36 N4 C51 116.1(4) . . ? 
C36 N4 Fe1 115.0(3) . . ? 
C51 N4 Fe1 128.8(3) . . ? 
C11 S1 Fe1 112.98(14) . . ? 
C2S O1S C1S 117.0(7) . . ? 
O1S C1S C3S 107.7(7) . . ? 
O1S C2S C4S 112.6(8) . . ? 
C12 C11 C16 118.9(4) . . ? 
C12 C11 S1 119.1(4) . . ? 
C16 C11 S1 122.0(4) . . ? 
C13 C12 C11 119.6(4) . . ? 
C13 C12 C121 116.8(4) . . ? 
C11 C12 C121 123.6(4) . . ? 
C14 C13 C12 123.1(5) . . ? 
C13 C14 C15 116.3(4) . . ? 
C13 C14 C141 122.2(4) . . ? 
C15 C14 C141 121.5(4) . . ? 
C14 C15 C16 123.2(4) . . ? 
C15 C16 C11 118.8(4) . . ? 
C15 C16 C161 115.5(4) . . ? 
C11 C16 C161 125.6(4) . . ? 
N1 C21 C22 128.0(4) . . ? 
N1 C21 C26 113.8(4) . . ? 
C22 C21 C26 118.2(4) . . ? 
C23 C22 C21 119.7(5) . . ? 
C22 C23 C24 122.4(5) . . ? 
C25 C24 C23 119.0(5) . . ? 
C25 C24 C241 121.7(5) . . ? 
C23 C24 C241 119.3(5) . . ? 
C24 C25 C26 120.8(4) . . ? 
N3 C26 C25 127.5(4) . . ? 
N3 C26 C21 112.6(4) . . ? 
C25 C26 C21 119.9(4) . . ? 
N2 C31 C32 127.4(4) . . ? 
N2 C31 C36 113.4(4) . . ? 
C32 C31 C36 119.2(4) . . ? 
C33 C32 C31 118.8(4) . . ? 
C32 C33 C34 122.5(5) . . ? 
C35 C34 C33 119.5(4) . . ? 
C35 C34 C341 121.8(4) . . ? 
C33 C34 C341 118.7(5) . . ? 
C34 C35 C36 120.6(4) . . ? 
N4 C36 C35 127.4(4) . . ? 
N4 C36 C31 113.2(4) . . ? 
C35 C36 C31 119.4(4) . . ? 
C42 C41 C46 118.5(4) . . ? 
C42 C41 N3 123.0(4) . . ? 
C46 C41 N3 118.4(4) . . ? 
C41 C42 C43 120.2(4) . . ? 
C44 C43 C42 121.8(4) . . ? 
C43 C44 C45 117.5(4) . . ? 
C43 C44 C441 122.3(4) . . ? 
C45 C44 C441 120.2(4) . . ? 
C46 C45 C44 121.3(4) . . ? 
C45 C46 C41 120.6(4) . . ? 
C52 C51 C56 119.5(4) . . ? 
C52 C51 N4 119.5(4) . . ? 
C56 C51 N4 121.0(4) . . ? 
C51 C52 C53 120.5(4) . . ? 
C54 C53 C52 120.7(5) . . ? 
C53 C54 C55 118.1(4) . . ? 
C53 C54 C541 120.3(5) . . ? 
C55 C54 C541 121.5(4) . . ? 
C56 C55 C54 121.7(4) . . ? 
C55 C56 C51 119.4(5) . . ? 
C122 C121 C126 117.7(5) . . ? 
C122 C121 C12 122.2(5) . . ? 
C126 C121 C12 120.0(5) . . ? 
C123 C122 C121 120.7(6) . . ? 
C122 C123 C124 121.3(6) . . ? 
C125 C124 C123 119.1(6) . . ? 
C124 C125 C126 120.2(6) . . ? 
C121 C126 C125 121.0(6) . . ? 
C146 C141 C142 117.1(4) . . ? 
C146 C141 C14 122.7(4) . . ? 
C142 C141 C14 120.1(4) . . ? 
C143 C142 C141 121.4(5) . . ? 
C144 C143 C142 120.3(5) . . ? 
C143 C144 C145 119.5(5) . . ? 
C146 C145 C144 119.7(5) . . ? 
C145 C146 C141 122.0(5) . . ? 
C166 C161 C162 117.5(4) . . ? 
C166 C161 C16 120.3(4) . . ? 
C162 C161 C16 121.9(4) . . ? 
C163 C162 C161 120.7(5) . . ? 
C164 C163 C162 120.6(5) . . ? 
C163 C164 C165 119.7(5) . . ? 
C164 C165 C166 119.8(5) . . ? 
C165 C166 C161 121.7(5) . . ? 
 
loop_ 
 _geom_torsion_atom_site_label_1 
 _geom_torsion_atom_site_label_2 
 _geom_torsion_atom_site_label_3 
 _geom_torsion_atom_site_label_4 
 _geom_torsion 
 _geom_torsion_site_symmetry_1 
 _geom_torsion_site_symmetry_2 
 _geom_torsion_site_symmetry_3 
 _geom_torsion_site_symmetry_4 
 _geom_torsion_publ_flag 
N2 Fe1 N1 C21 19(2) . . . . ? 
N3 Fe1 N1 C21 8.2(3) . . . . ? 
N4 Fe1 N1 C21 133.1(3) . . . . ? 
S1 Fe1 N1 C21 -115.1(3) . . . . ? 
N2 Fe1 N1 C27 -166(2) . . . . ? 
N3 Fe1 N1 C27 -177.0(4) . . . . ? 
N4 Fe1 N1 C27 -52.2(4) . . . . ? 
S1 Fe1 N1 C27 59.6(3) . . . . ? 
N1 Fe1 N2 C31 114(2) . . . . ? 
N3 Fe1 N2 C31 124.4(3) . . . . ? 
N4 Fe1 N2 C31 -1.0(3) . . . . ? 
S1 Fe1 N2 C31 -112.0(3) . . . . ? 
N1 Fe1 N2 C37 -71(2) . . . . ? 
N3 Fe1 N2 C37 -60.5(4) . . . . ? 
N4 Fe1 N2 C37 174.2(4) . . . . ? 
S1 Fe1 N2 C37 63.1(4) . . . . ? 
N1 Fe1 N3 C26 -5.2(3) . . . . ? 
N2 Fe1 N3 C26 175.5(3) . . . . ? 
N4 Fe1 N3 C26 -101.4(3) . . . . ? 
S1 Fe1 N3 C26 86.4(3) . . . . ? 
N1 Fe1 N3 C41 168.3(3) . . . . ? 
N2 Fe1 N3 C41 -11.0(3) . . . . ? 
N4 Fe1 N3 C41 72.1(4) . . . . ? 
S1 Fe1 N3 C41 -100.1(3) . . . . ? 
N1 Fe1 N4 C36 -174.0(3) . . . . ? 
N2 Fe1 N4 C36 2.3(3) . . . . ? 
N3 Fe1 N4 C36 -87.2(3) . . . . ? 
S1 Fe1 N4 C36 85.9(3) . . . . ? 
N1 Fe1 N4 C51 10.6(4) . . . . ? 
N2 Fe1 N4 C51 -173.1(4) . . . . ? 
N3 Fe1 N4 C51 97.5(4) . . . . ? 
S1 Fe1 N4 C51 -89.5(4) . . . . ? 
N1 Fe1 S1 C11 10.8(2) . . . . ? 
N2 Fe1 S1 C11 -166.3(2) . . . . ? 
N3 Fe1 S1 C11 -73.3(2) . . . . ? 
N4 Fe1 S1 C11 113.5(2) . . . . ? 
C2S O1S C1S C3S -172.8(8) . . . . ? 
C1S O1S C2S C4S 171.0(9) . . . . ? 
Fe1 S1 C11 C12 -108.6(3) . . . . ? 
Fe1 S1 C11 C16 70.8(4) . . . . ? 
C16 C11 C12 C13 -2.2(6) . . . . ? 
S1 C11 C12 C13 177.2(3) . . . . ? 
C16 C11 C12 C121 -179.9(4) . . . . ? 
S1 C11 C12 C121 -0.5(6) . . . . ? 
C11 C12 C13 C14 0.0(7) . . . . ? 
C121 C12 C13 C14 177.9(4) . . . . ? 
C12 C13 C14 C15 1.7(6) . . . . ? 
C12 C13 C14 C141 -176.6(4) . . . . ? 
C13 C14 C15 C16 -1.4(6) . . . . ? 
C141 C14 C15 C16 177.0(4) . . . . ? 
C14 C15 C16 C11 -0.7(6) . . . . ? 
C14 C15 C16 C161 178.9(4) . . . . ? 
C12 C11 C16 C15 2.5(6) . . . . ? 
S1 C11 C16 C15 -176.9(3) . . . . ? 
C12 C11 C16 C161 -177.1(4) . . . . ? 
S1 C11 C16 C161 3.5(6) . . . . ? 
C27 N1 C21 C22 -1.4(6) . . . . ? 
Fe1 N1 C21 C22 173.8(3) . . . . ? 
C27 N1 C21 C26 175.2(3) . . . . ? 
Fe1 N1 C21 C26 -9.6(5) . . . . ? 
N1 C21 C22 C23 174.9(4) . . . . ? 
C26 C21 C22 C23 -1.6(6) . . . . ? 
C21 C22 C23 C24 -1.3(7) . . . . ? 
C22 C23 C24 C25 2.0(7) . . . . ? 
C22 C23 C24 C241 -175.9(4) . . . . ? 
C23 C24 C25 C26 0.2(6) . . . . ? 
C241 C24 C25 C26 178.2(4) . . . . ? 
C41 N3 C26 C25 5.8(6) . . . . ? 
Fe1 N3 C26 C25 179.8(3) . . . . ? 
C41 N3 C26 C21 -172.4(3) . . . . ? 
Fe1 N3 C26 C21 1.6(4) . . . . ? 
C24 C25 C26 N3 178.8(4) . . . . ? 
C24 C25 C26 C21 -3.1(6) . . . . ? 
N1 C21 C26 N3 5.1(5) . . . . ? 
C22 C21 C26 N3 -177.9(4) . . . . ? 
N1 C21 C26 C25 -173.2(4) . . . . ? 
C22 C21 C26 C25 3.7(6) . . . . ? 
C37 N2 C31 C32 6.7(7) . . . . ? 
Fe1 N2 C31 C32 -177.9(4) . . . . ? 
C37 N2 C31 C36 -175.9(4) . . . . ? 
Fe1 N2 C31 C36 -0.4(5) . . . . ? 
N2 C31 C32 C33 175.7(5) . . . . ? 
C36 C31 C32 C33 -1.7(7) . . . . ? 
C31 C32 C33 C34 0.1(7) . . . . ? 
C32 C33 C34 C35 2.0(8) . . . . ? 
C32 C33 C34 C341 -176.8(5) . . . . ? 
C33 C34 C35 C36 -2.5(7) . . . . ? 
C341 C34 C35 C36 176.3(4) . . . . ? 
C51 N4 C36 C35 -8.5(7) . . . . ? 
Fe1 N4 C36 C35 175.6(4) . . . . ? 
C51 N4 C36 C31 172.9(4) . . . . ? 
Fe1 N4 C36 C31 -3.1(5) . . . . ? 
C34 C35 C36 N4 -177.6(5) . . . . ? 
C34 C35 C36 C31 0.9(7) . . . . ? 
N2 C31 C36 N4 2.3(6) . . . . ? 
C32 C31 C36 N4 179.9(4) . . . . ? 
N2 C31 C36 C35 -176.5(4) . . . . ? 
C32 C31 C36 C35 1.2(6) . . . . ? 
C26 N3 C41 C42 -75.2(5) . . . . ? 
Fe1 N3 C41 C42 111.5(4) . . . . ? 
C26 N3 C41 C46 109.3(5) . . . . ? 
Fe1 N3 C41 C46 -64.0(5) . . . . ? 
C46 C41 C42 C43 -0.5(7) . . . . ? 
N3 C41 C42 C43 -176.0(4) . . . . ? 
C41 C42 C43 C44 0.6(7) . . . . ? 
C42 C43 C44 C45 -0.6(7) . . . . ? 
C42 C43 C44 C441 179.9(4) . . . . ? 
C43 C44 C45 C46 0.6(7) . . . . ? 
C441 C44 C45 C46 -180.0(4) . . . . ? 
C44 C45 C46 C41 -0.5(7) . . . . ? 
C42 C41 C46 C45 0.4(7) . . . . ? 
N3 C41 C46 C45 176.1(4) . . . . ? 
C36 N4 C51 C52 -75.7(5) . . . . ? 
Fe1 N4 C51 C52 99.6(5) . . . . ? 
C36 N4 C51 C56 104.6(5) . . . . ? 
Fe1 N4 C51 C56 -80.1(5) . . . . ? 
C56 C51 C52 C53 -1.3(7) . . . . ? 
N4 C51 C52 C53 179.0(4) . . . . ? 
C51 C52 C53 C54 -0.3(7) . . . . ? 
C52 C53 C54 C55 1.3(7) . . . . ? 
C52 C53 C54 C541 -178.0(5) . . . . ? 
C53 C54 C55 C56 -0.7(7) . . . . ? 
C541 C54 C55 C56 178.6(5) . . . . ? 
C54 C55 C56 C51 -0.9(7) . . . . ? 
C52 C51 C56 C55 1.9(7) . . . . ? 
N4 C51 C56 C55 -178.4(4) . . . . ? 
C13 C12 C121 C122 126.3(5) . . . . ? 
C11 C12 C121 C122 -55.9(6) . . . . ? 
C13 C12 C121 C126 -50.0(6) . . . . ? 
C11 C12 C121 C126 127.8(5) . . . . ? 
C126 C121 C122 C123 -0.2(8) . . . . ? 
C12 C121 C122 C123 -176.6(5) . . . . ? 
C121 C122 C123 C124 -0.2(9) . . . . ? 
C122 C123 C124 C125 0.5(10) . . . . ? 
C123 C124 C125 C126 -0.3(9) . . . . ? 
C122 C121 C126 C125 0.4(7) . . . . ? 
C12 C121 C126 C125 176.9(5) . . . . ? 
C124 C125 C126 C121 -0.1(9) . . . . ? 
C13 C14 C141 C146 -148.9(5) . . . . ? 
C15 C14 C141 C146 32.8(7) . . . . ? 
C13 C14 C141 C142 34.2(7) . . . . ? 
C15 C14 C141 C142 -144.1(5) . . . . ? 
C146 C141 C142 C143 -0.3(7) . . . . ? 
C14 C141 C142 C143 176.7(5) . . . . ? 
C141 C142 C143 C144 -0.1(8) . . . . ? 
C142 C143 C144 C145 0.4(8) . . . . ? 
C143 C144 C145 C146 -0.3(8) . . . . ? 
C144 C145 C146 C141 -0.1(8) . . . . ? 
C142 C141 C146 C145 0.4(7) . . . . ? 
C14 C141 C146 C145 -176.5(5) . . . . ? 
C15 C16 C161 C166 43.5(6) . . . . ? 
C11 C16 C161 C166 -136.9(5) . . . . ? 
C15 C16 C161 C162 -129.9(4) . . . . ? 
C11 C16 C161 C162 49.8(6) . . . . ? 
C166 C161 C162 C163 -1.4(6) . . . . ? 
C16 C161 C162 C163 172.0(4) . . . . ? 
C161 C162 C163 C164 1.3(7) . . . . ? 
C162 C163 C164 C165 0.0(7) . . . . ? 
C163 C164 C165 C166 -1.1(7) . . . . ? 
C164 C165 C166 C161 0.9(7) . . . . ? 
C162 C161 C166 C165 0.3(7) . . . . ? 
C16 C161 C166 C165 -173.3(4) . . . . ? 
 
 #===END

 
